# Supplementary material
Source: publisher figshare collection journal article supplement (https://frontiersin.figshare.com/ndownloader/files/15450314)

# NA1-Group1

Supplementary Figure 4. 114 phylogenetic trees of NA used for the adaptive evolution analyses. Human strains are marked in red. Branches which have significant signals of positive selection are marked with \*.

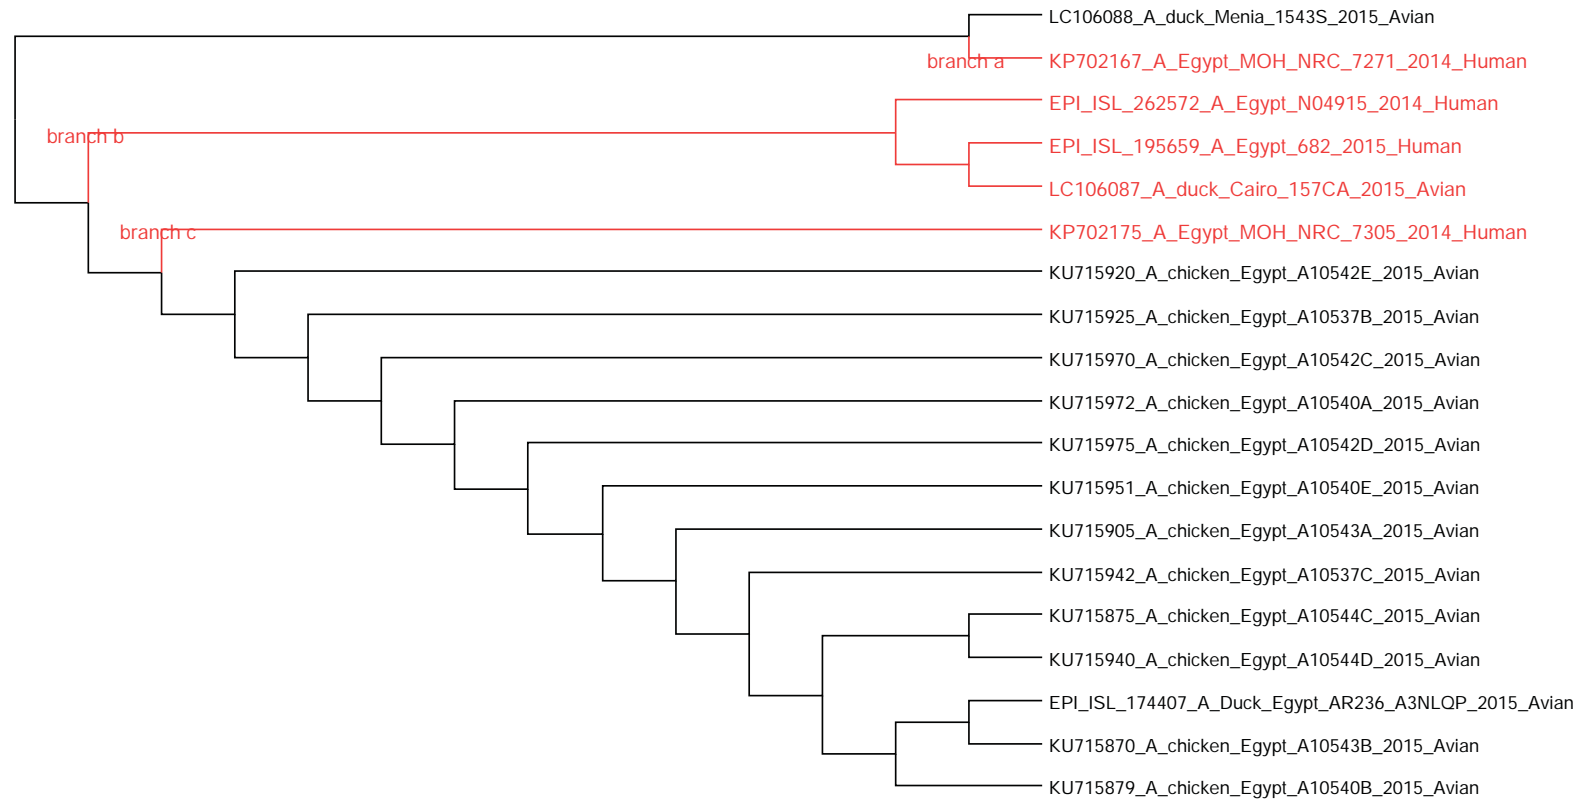

# NA1-Group2

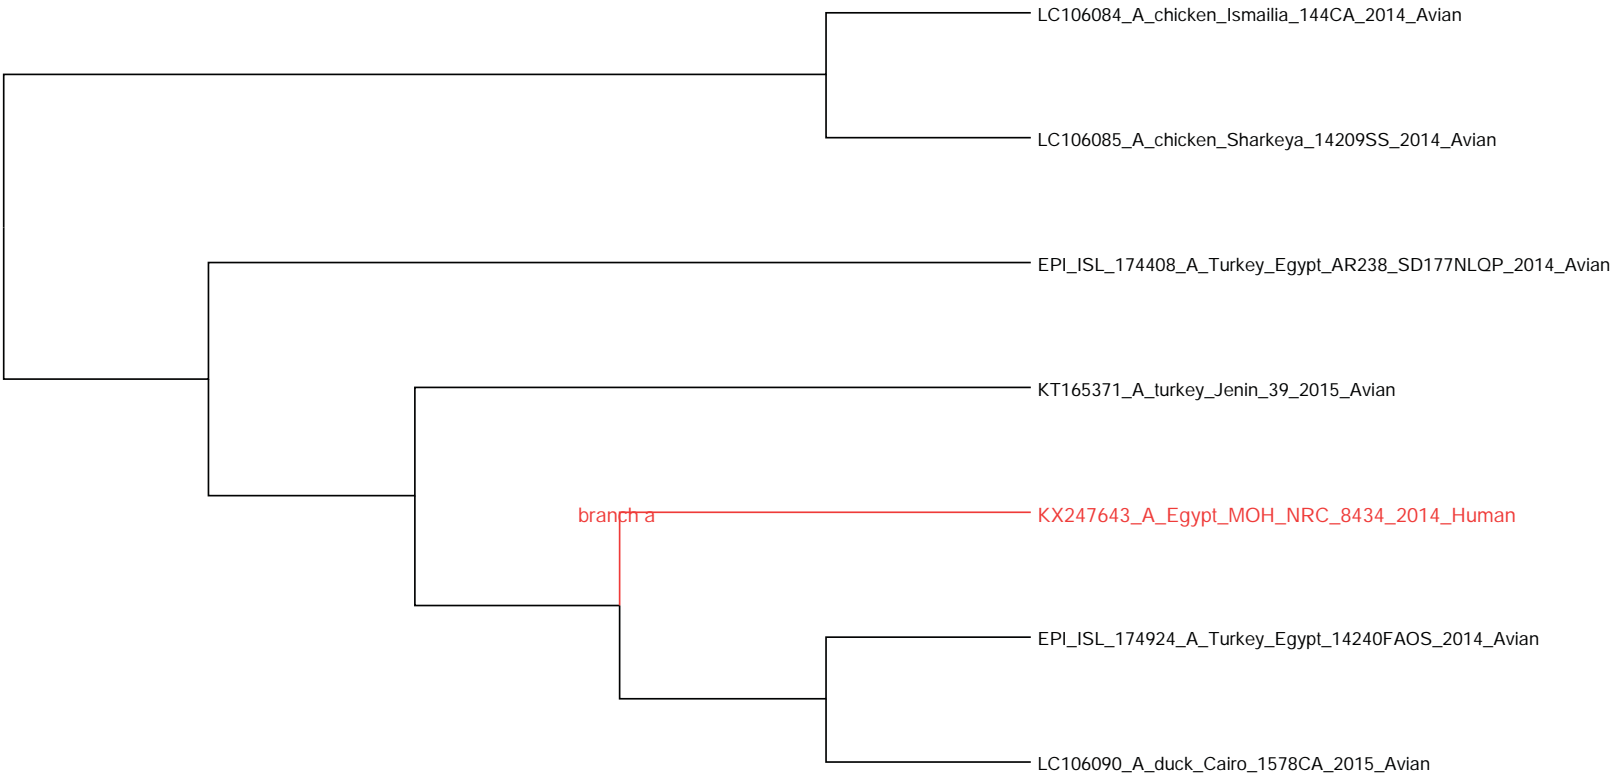

# NA1-Group3

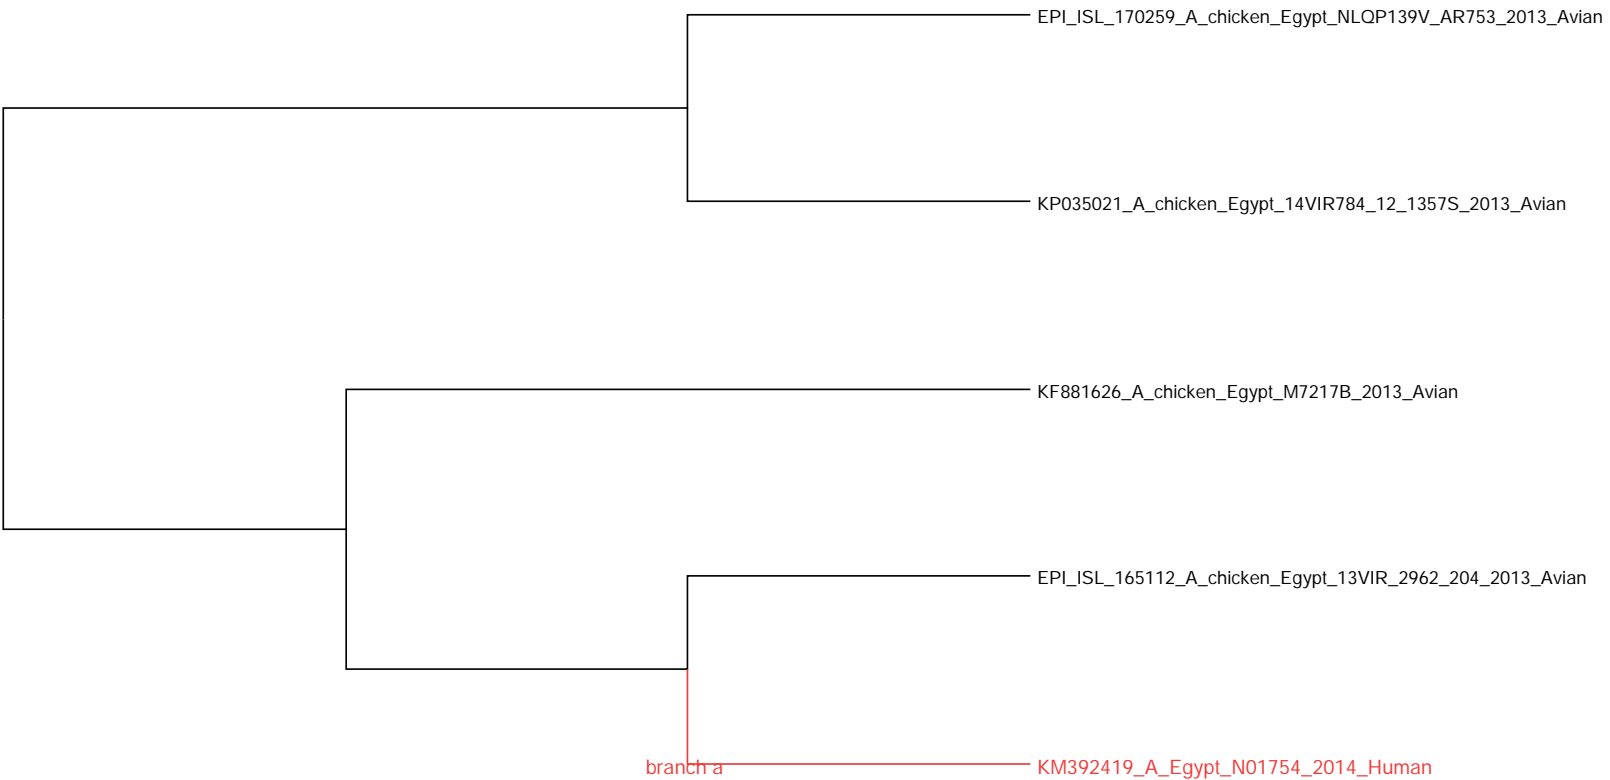

# NA1-Group4

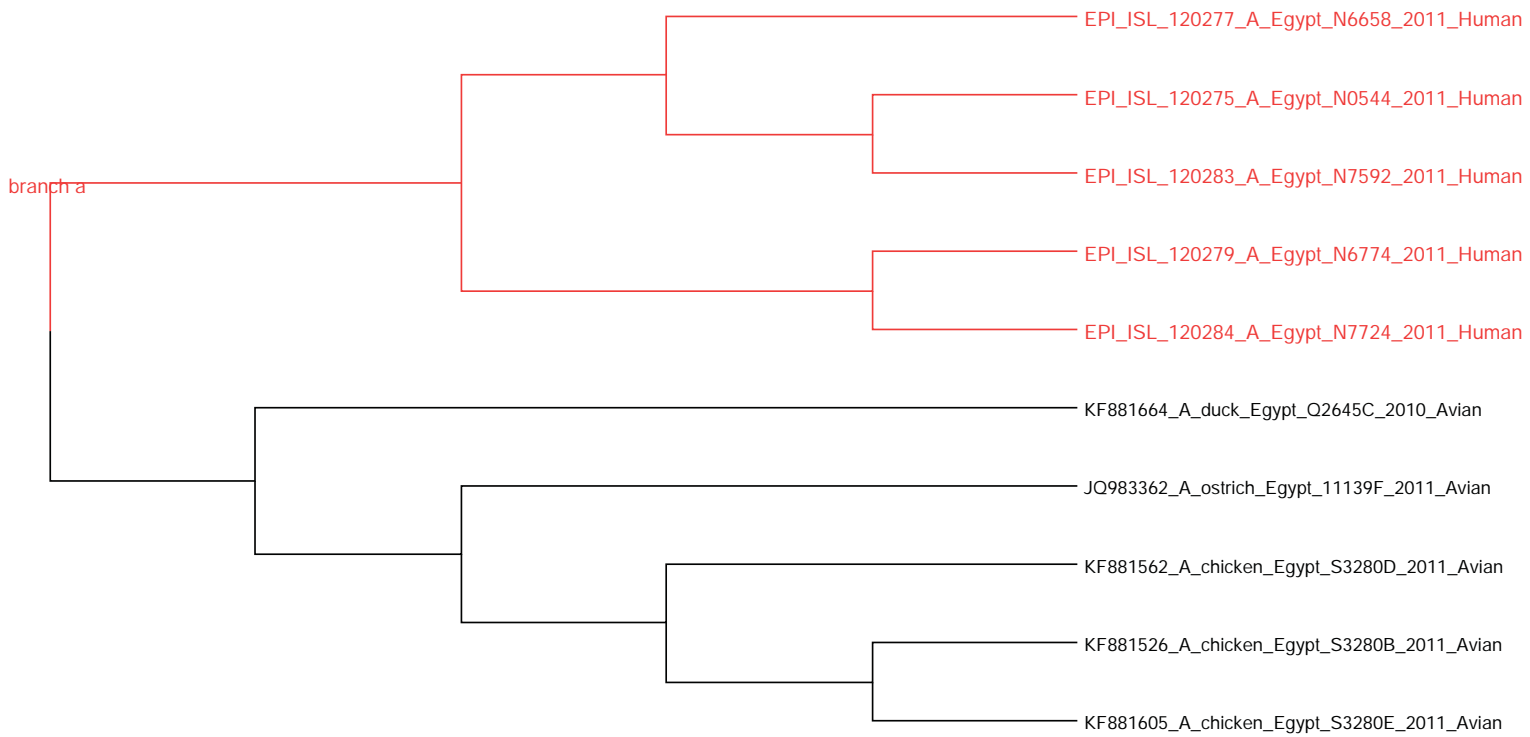

# NA1-Groups

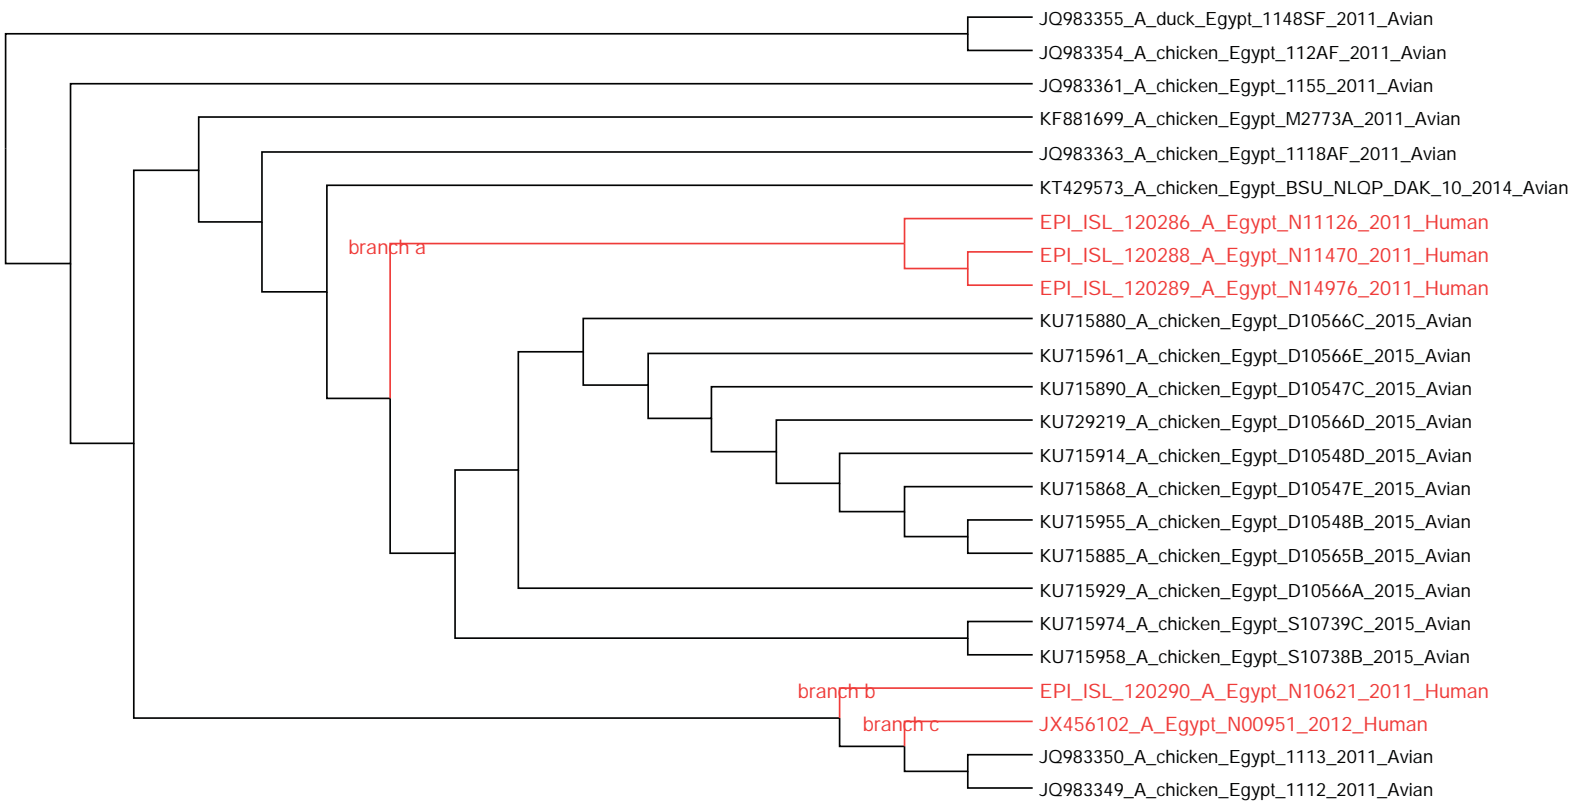

# NA1-Group6

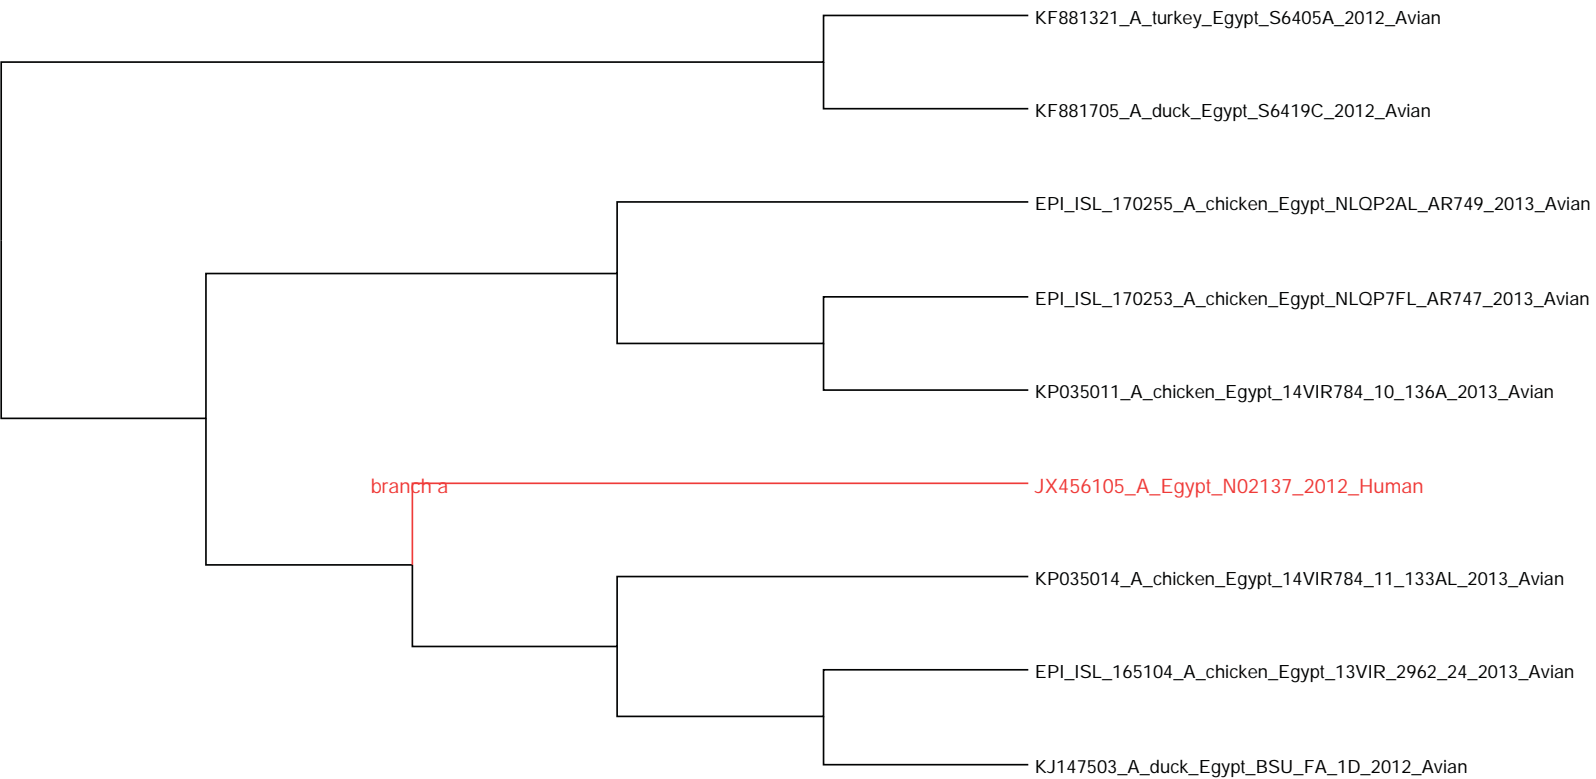

# NA1-Group7

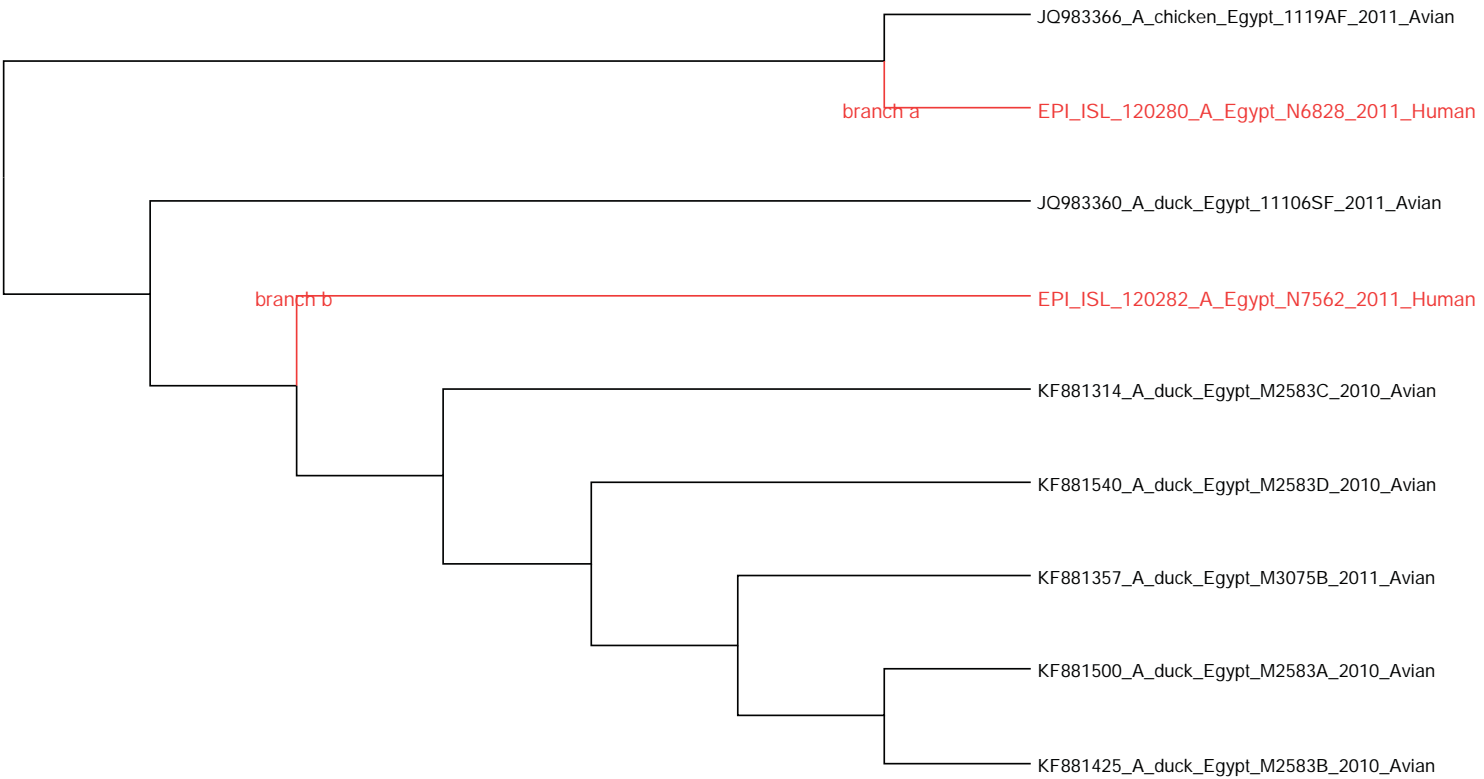

# NA1-Group8

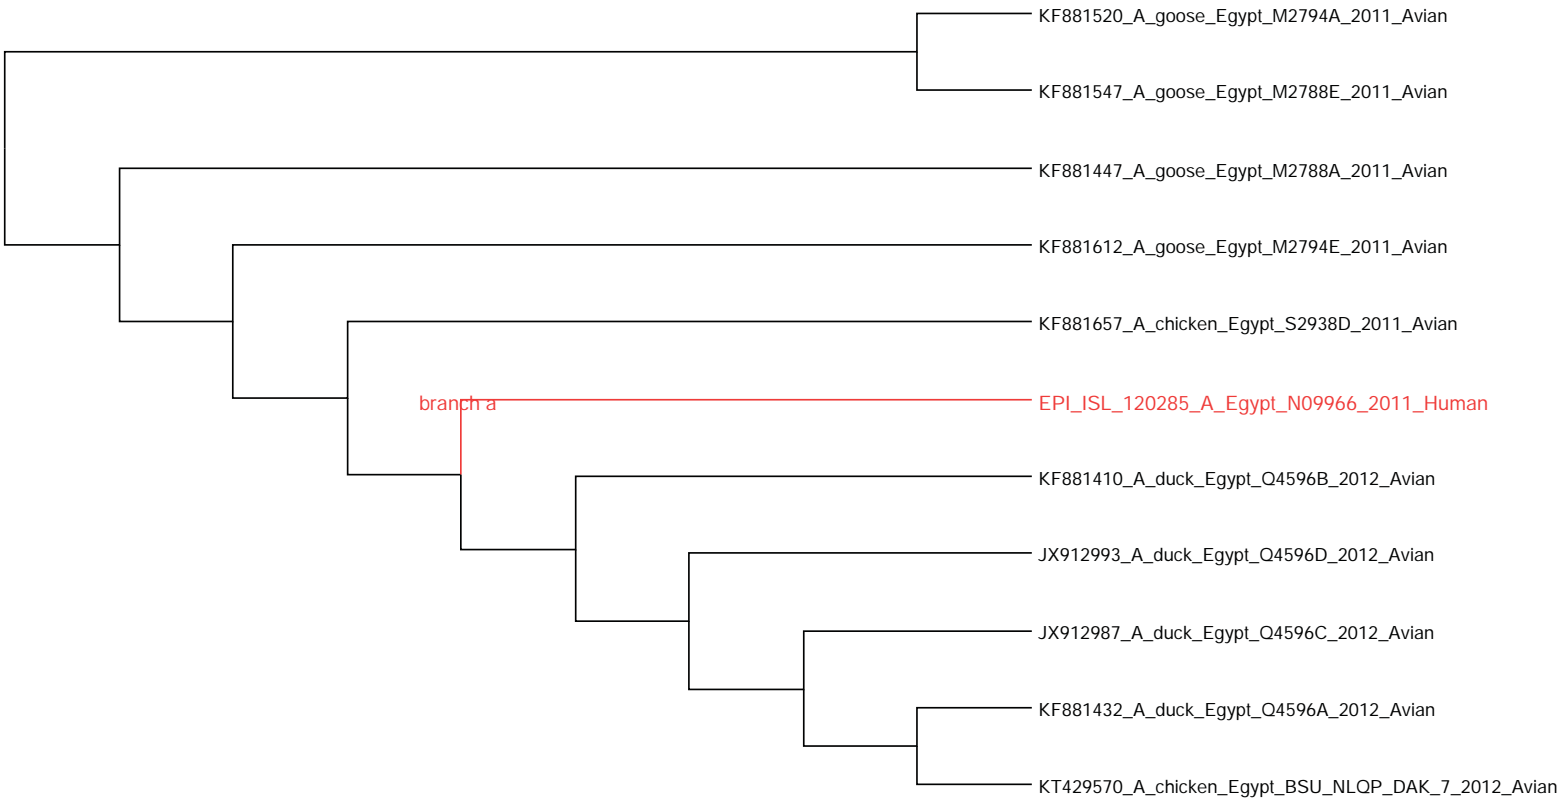



# NA1-Group9

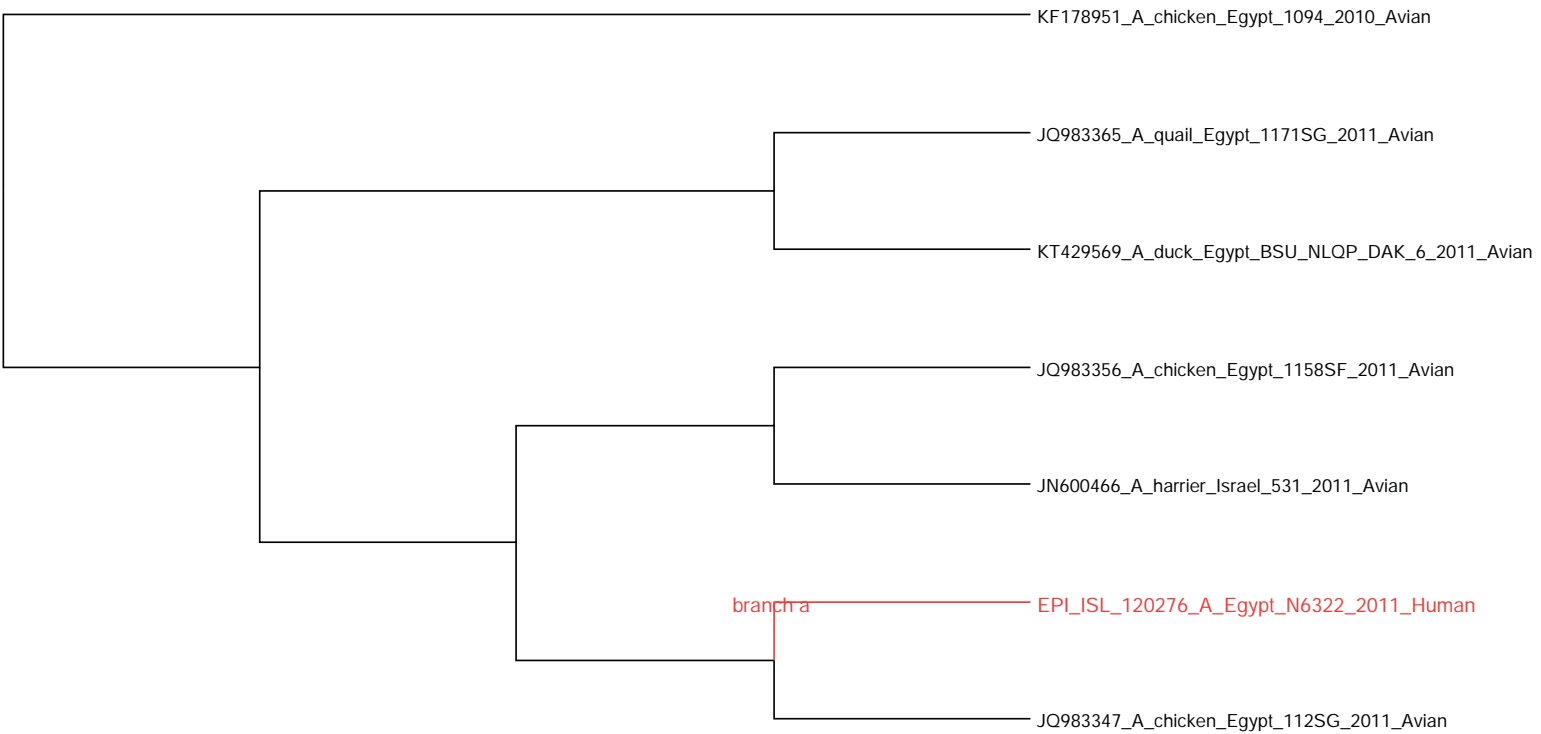

# NA1-Group10

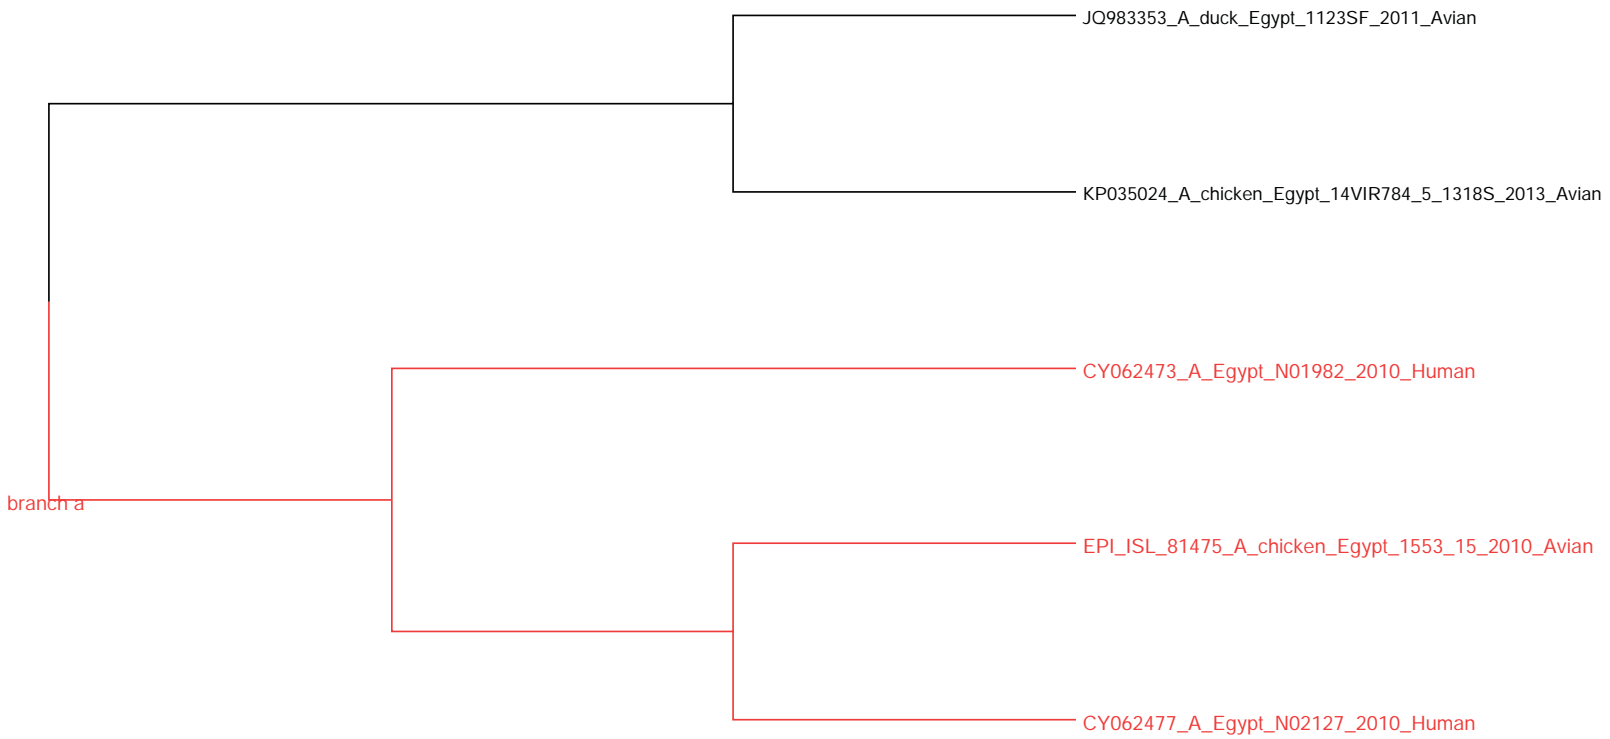

# NA1-Group1

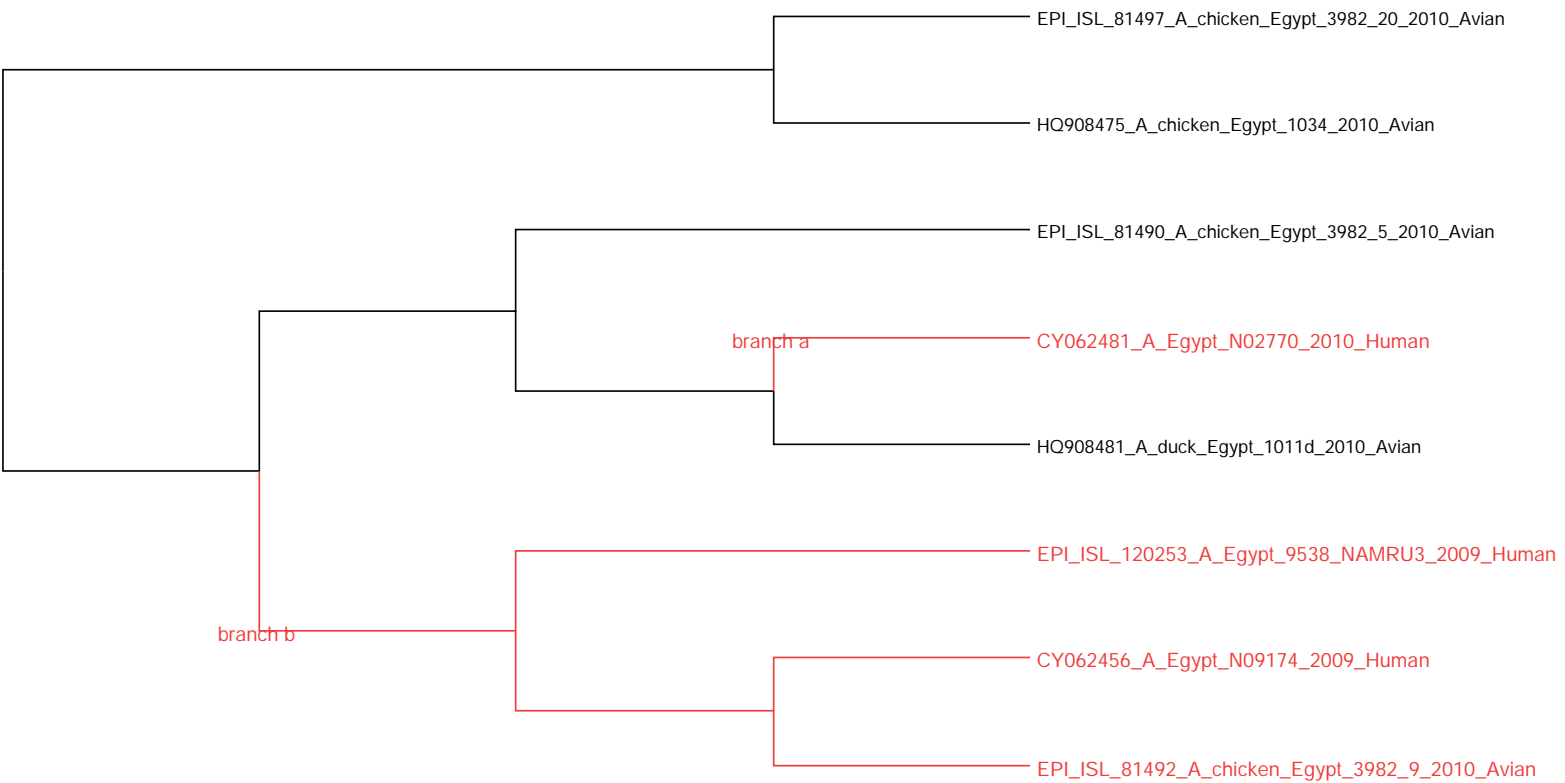

# NA1-Group12

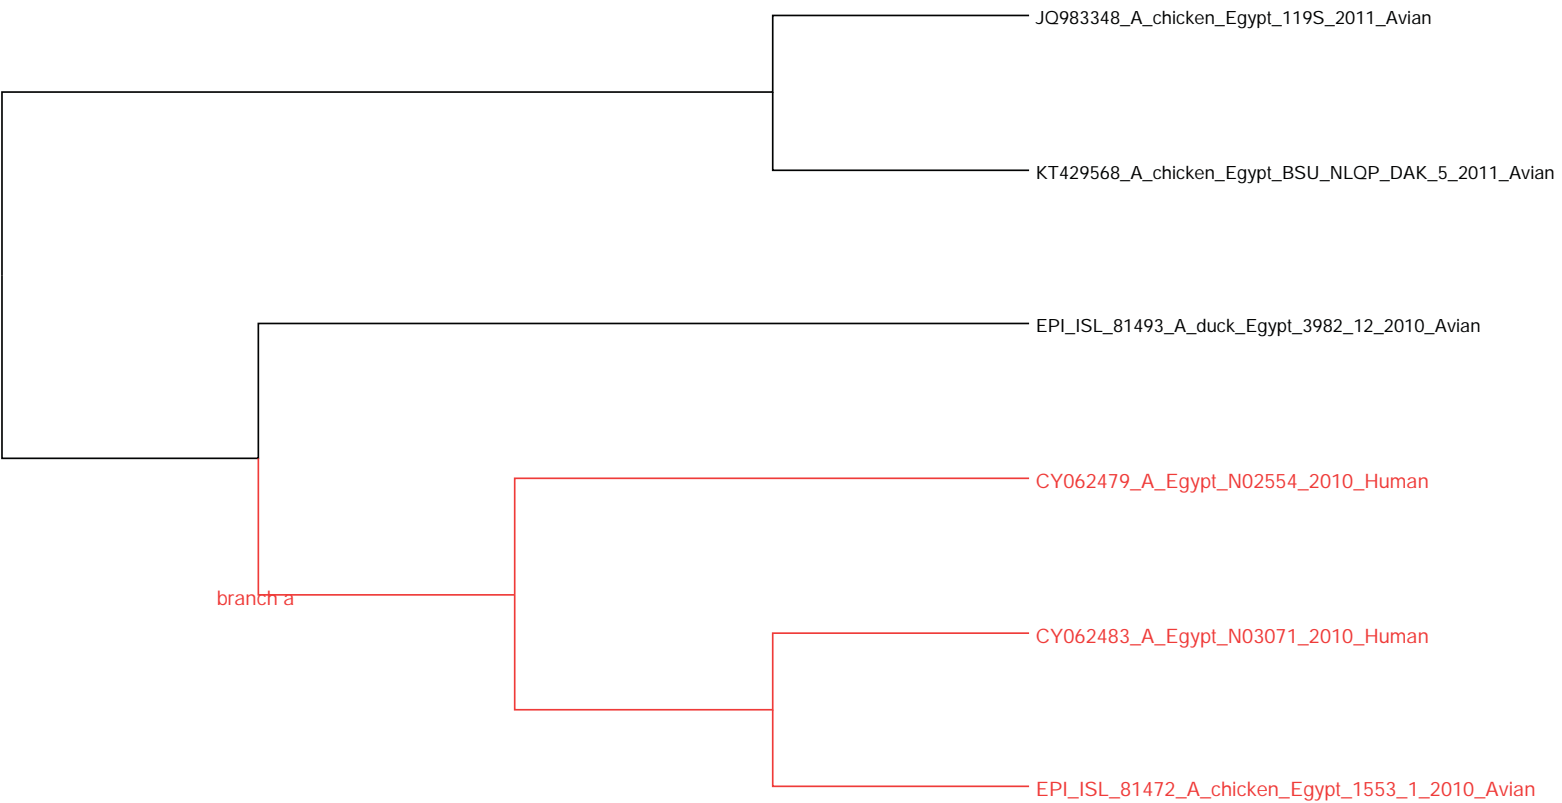

# NA1-Group13

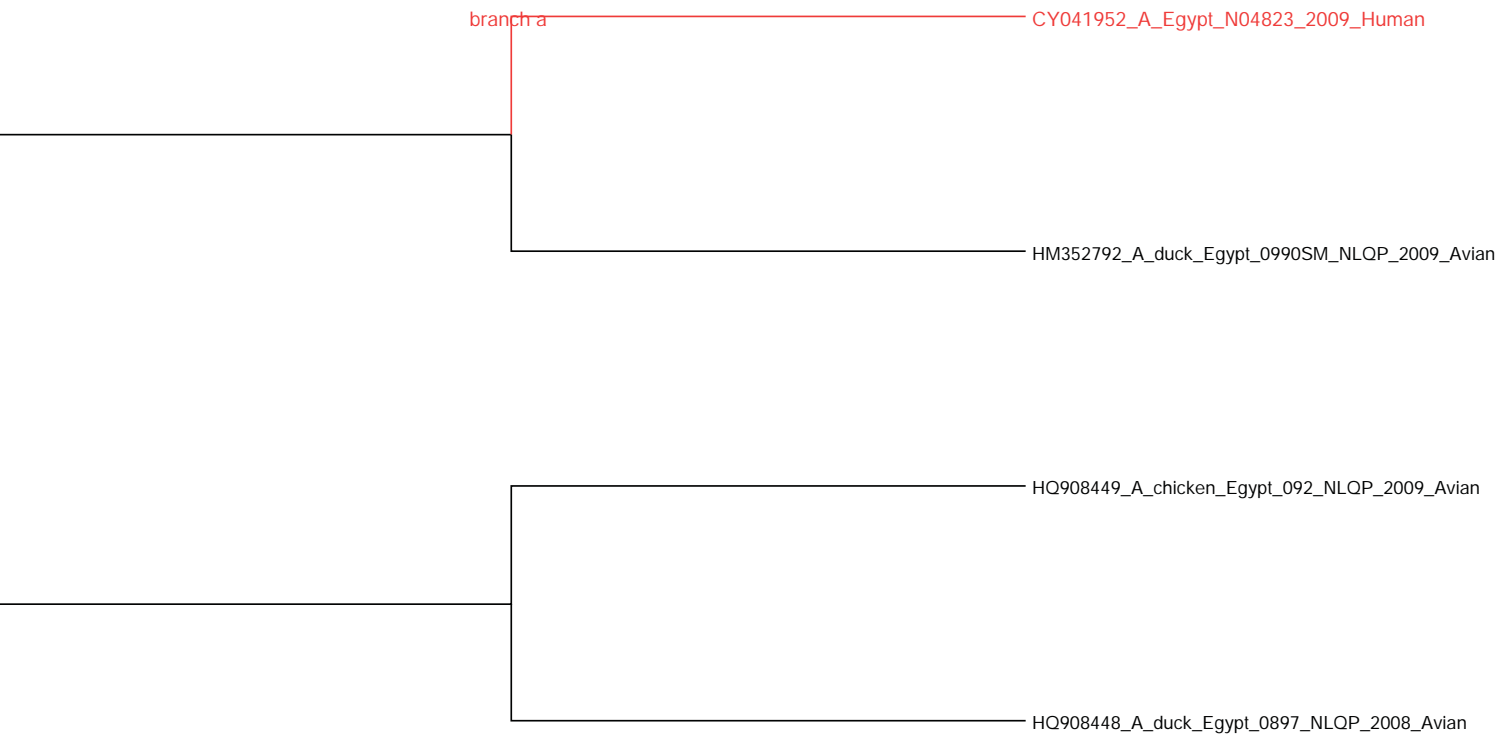

# NA1-Group14

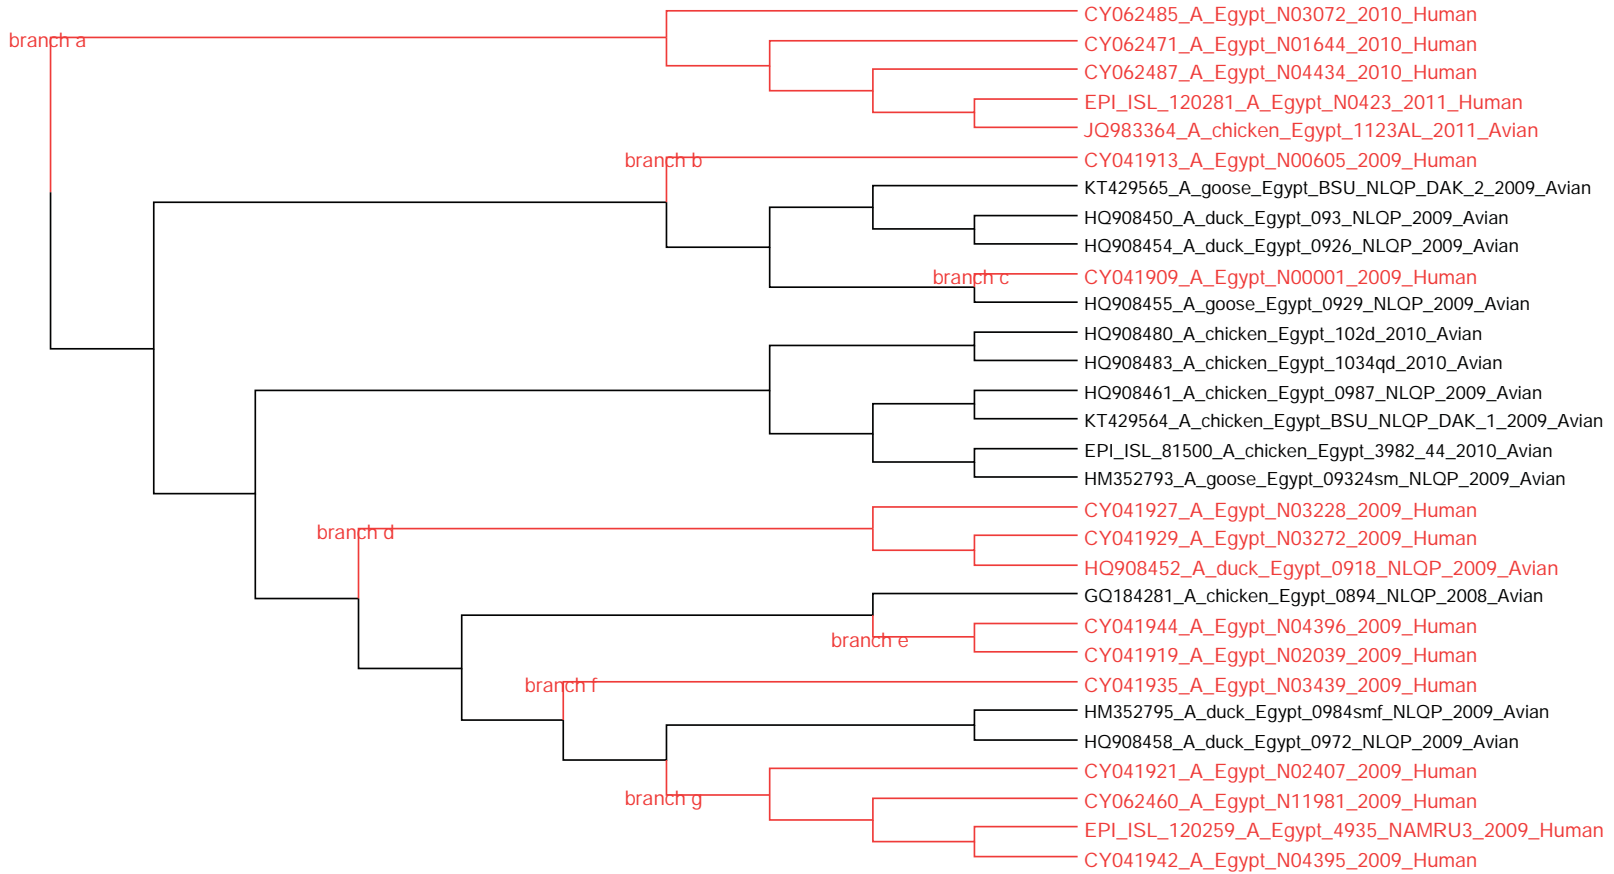

# NA1-Group15

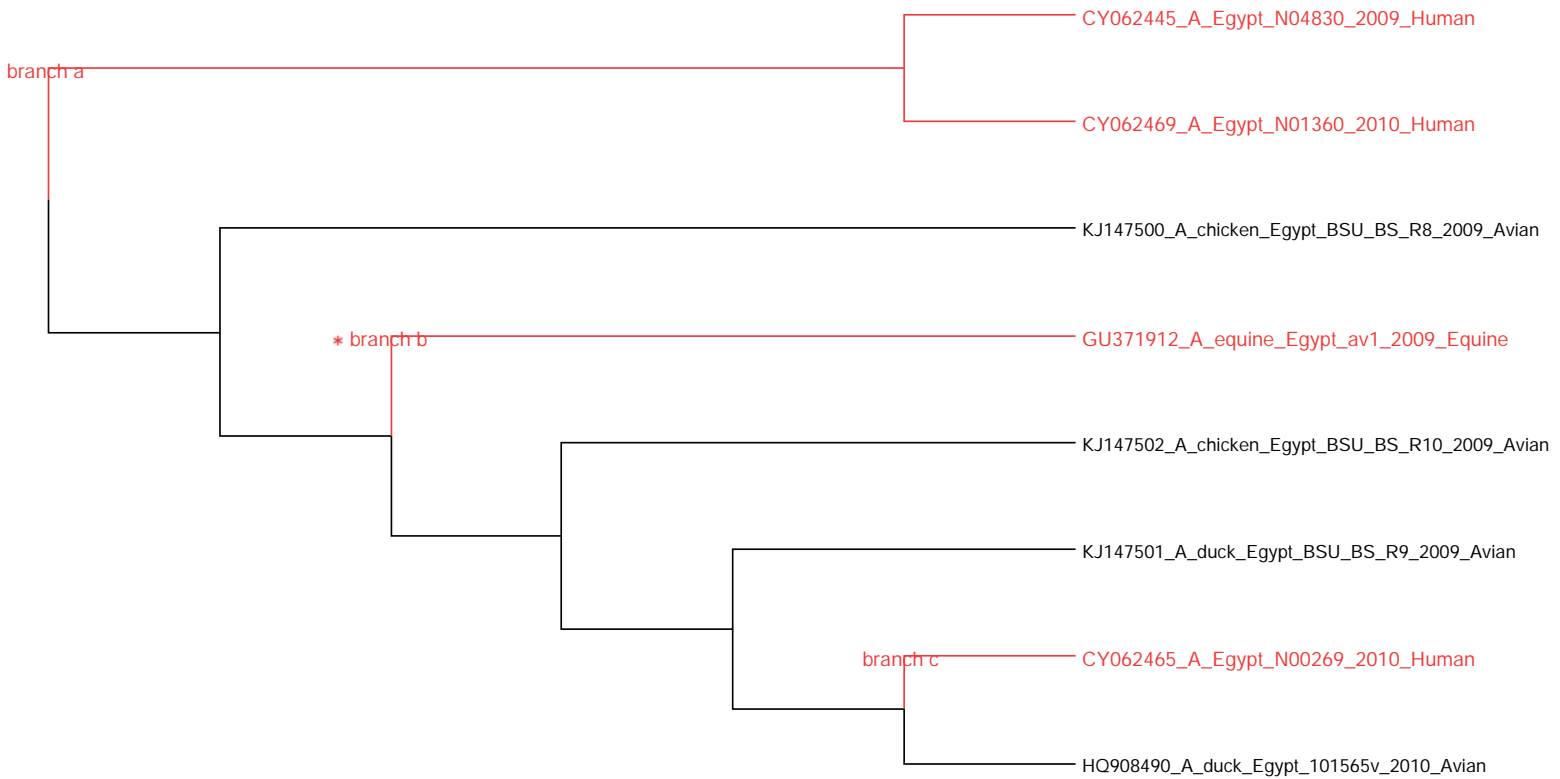

# NA1-Group16

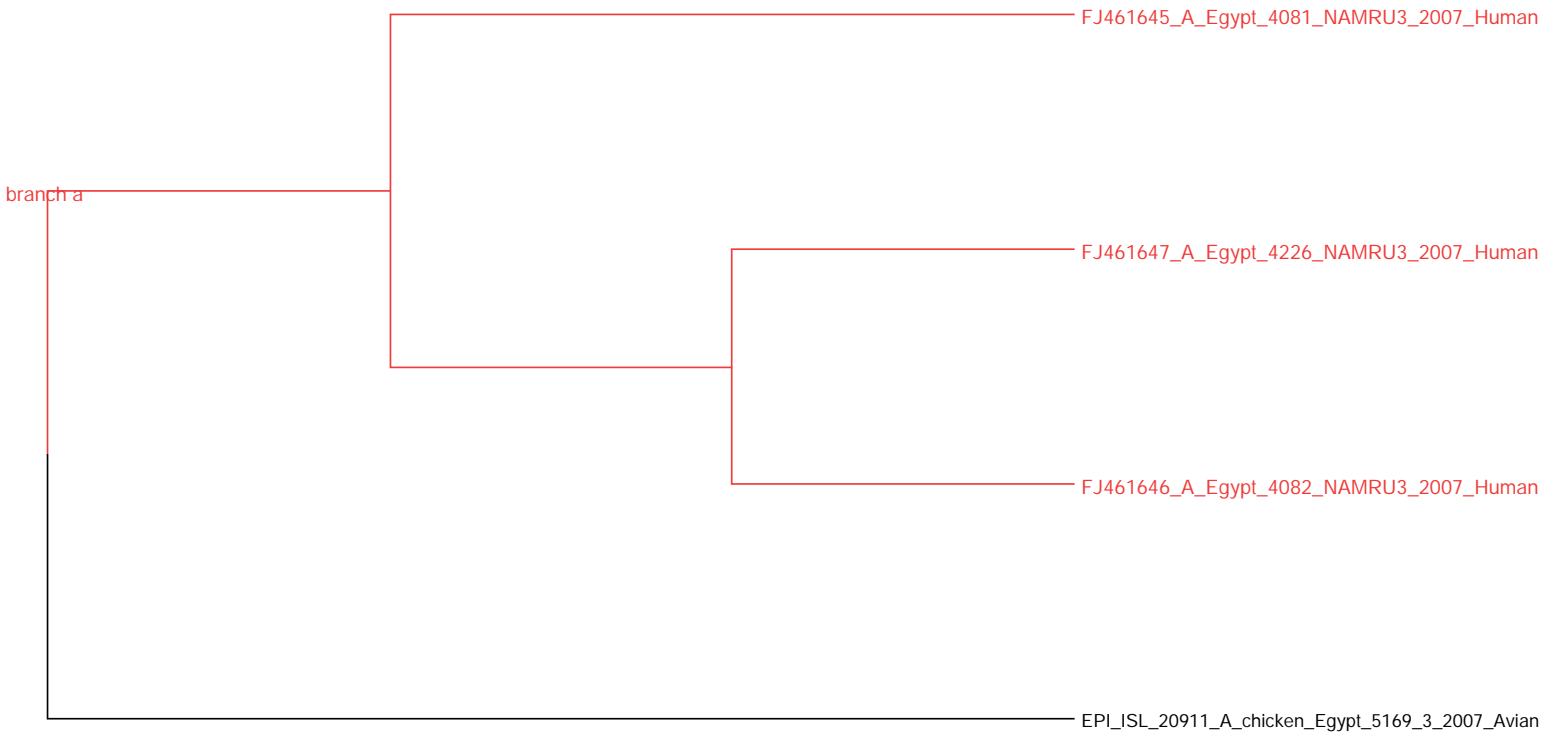



# NA1-Group17

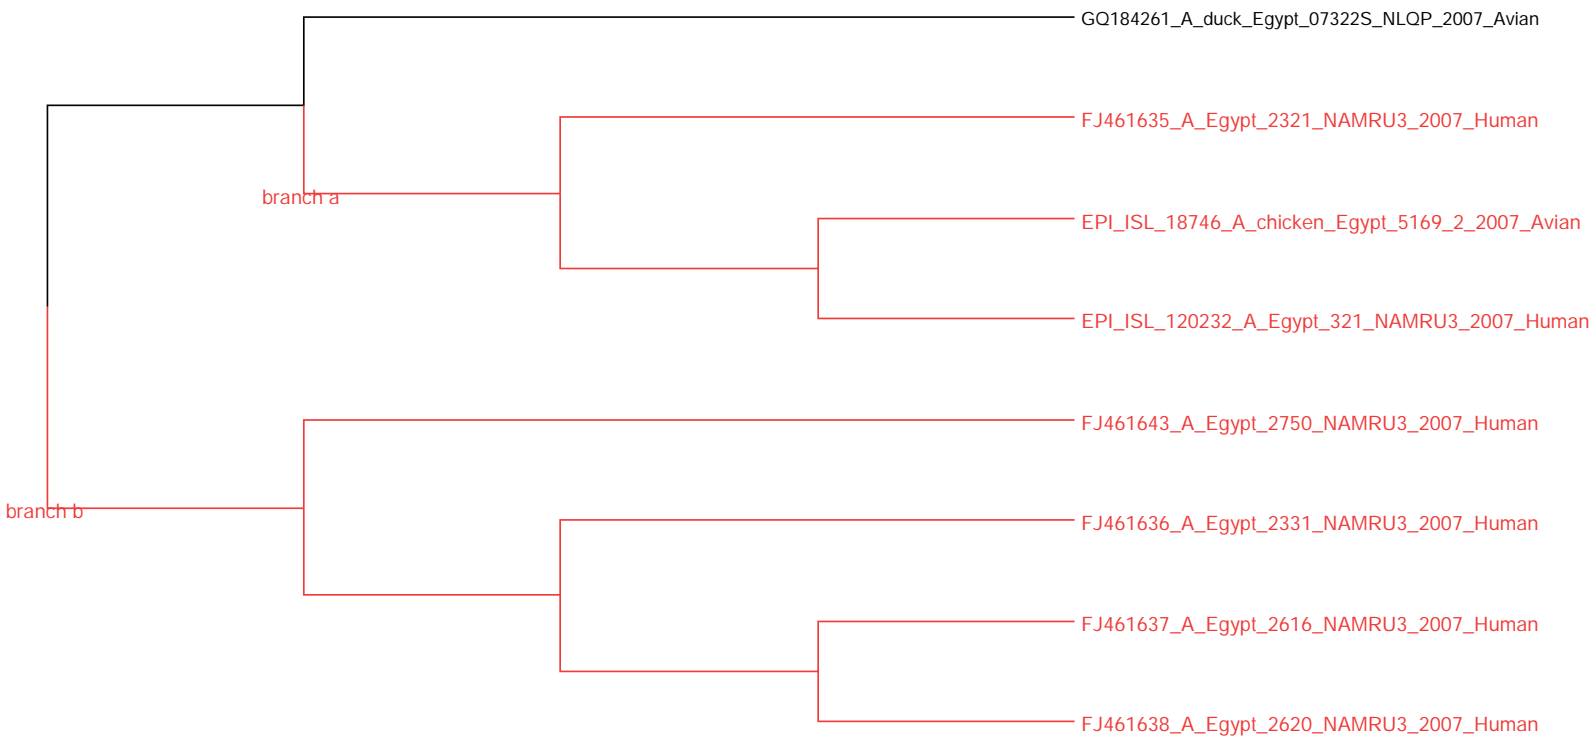

# NA1-Group18

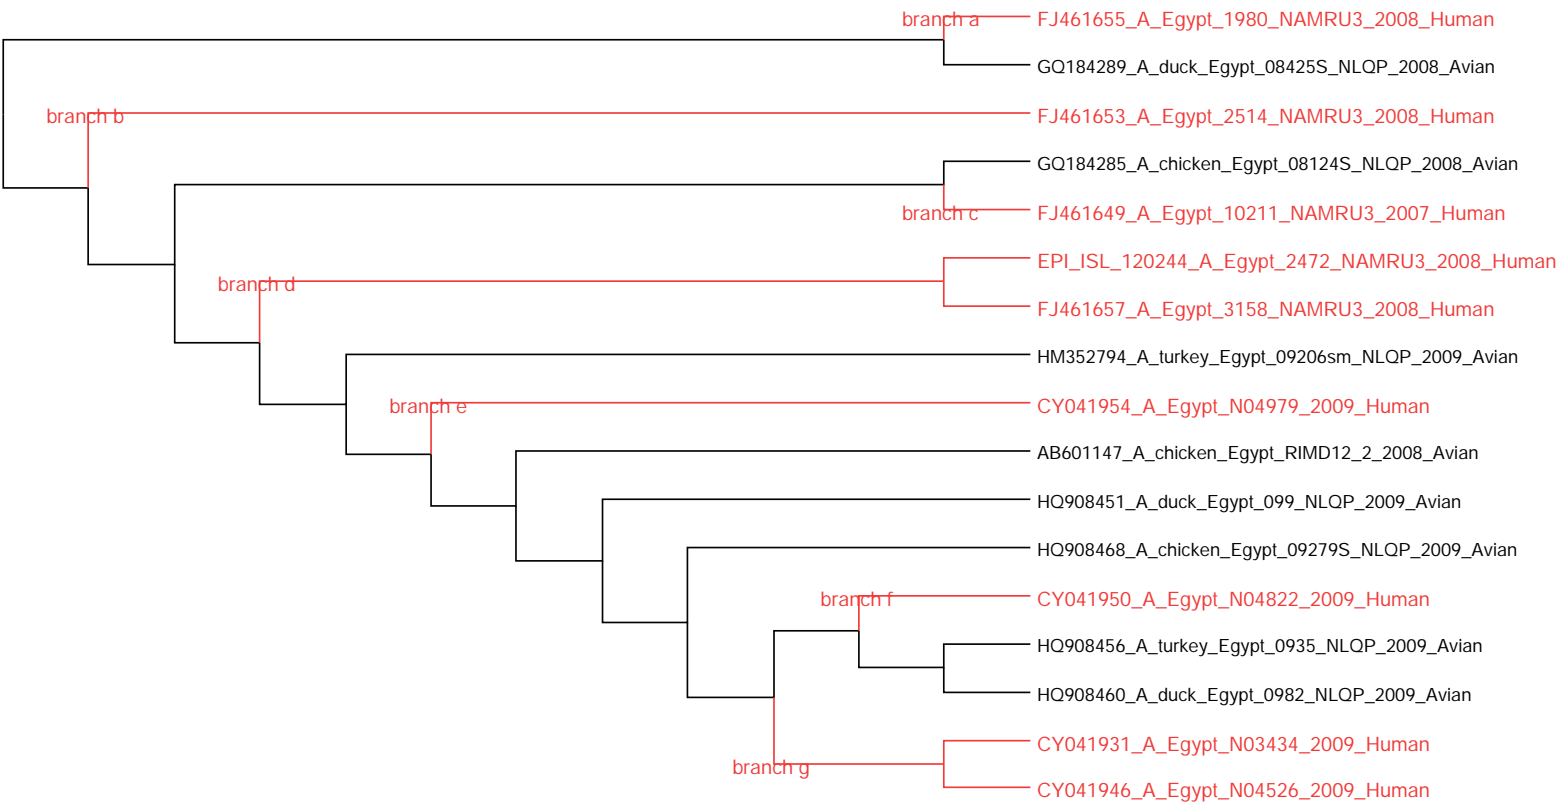

# NA1-Group19

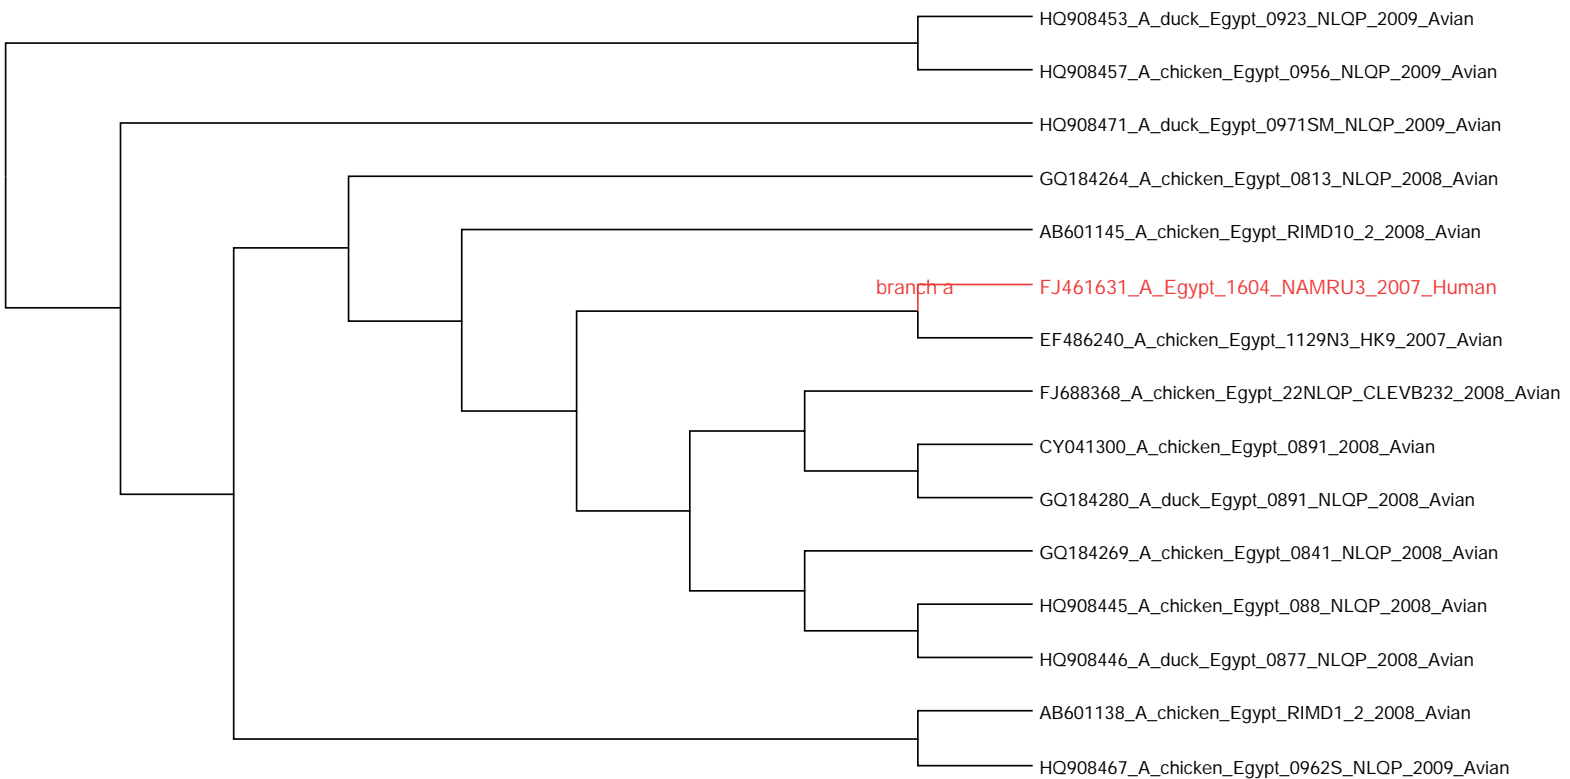

# NA1-Group20

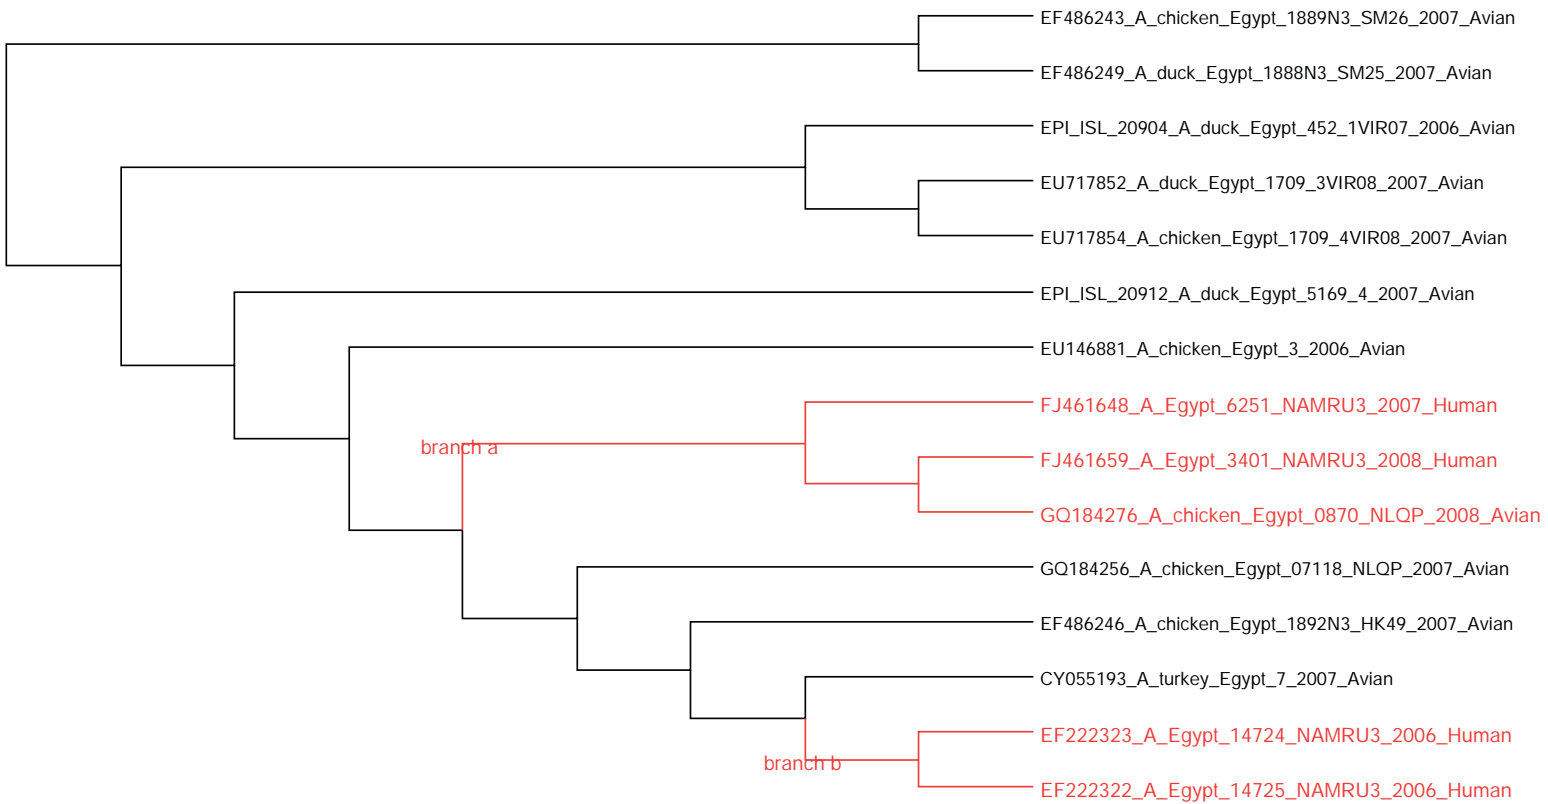

# NA1-Group21

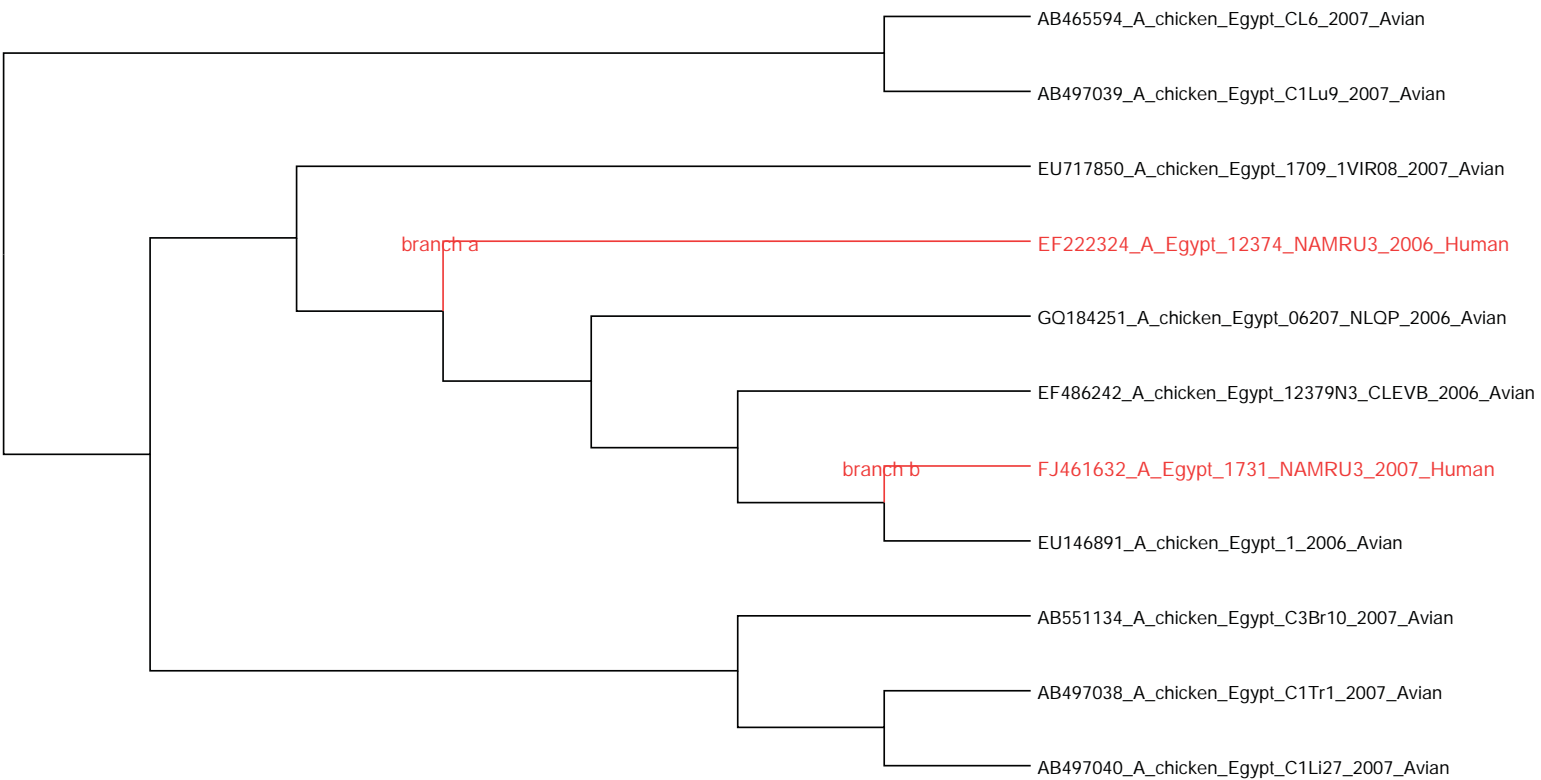

# NA1-Group22

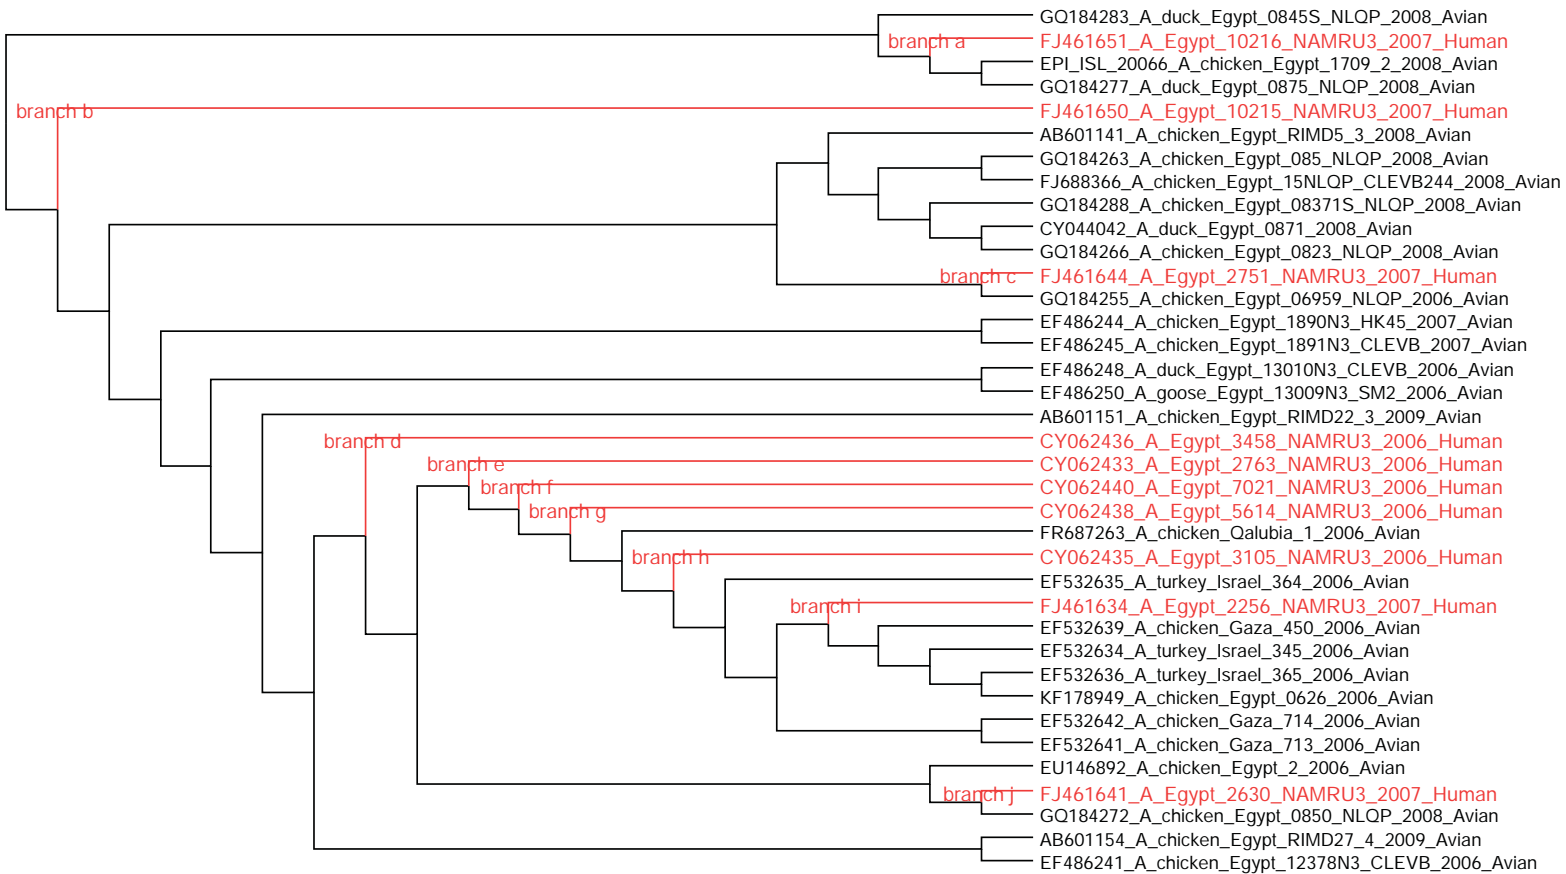

# NA1-Group23

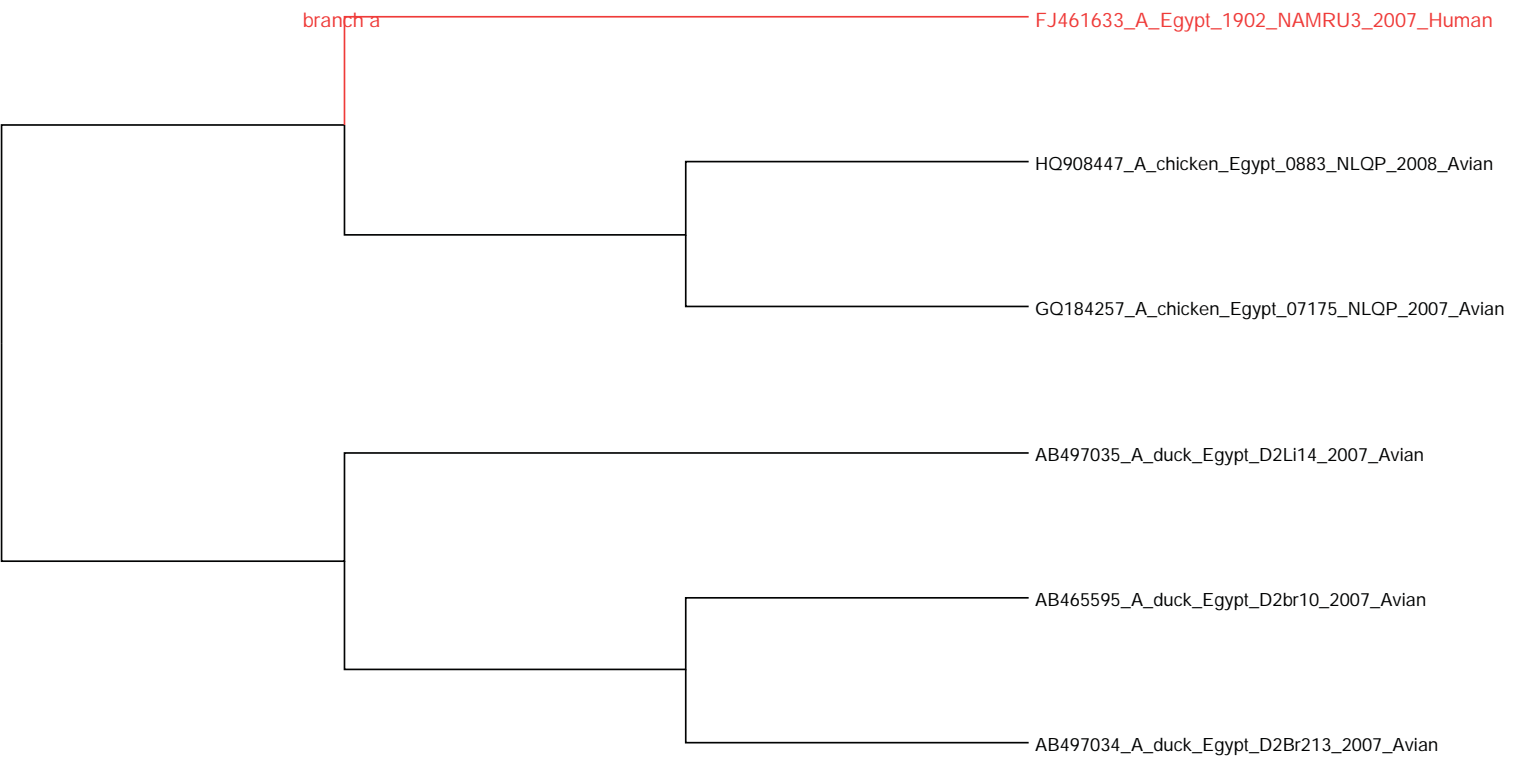

# NA1-Group24

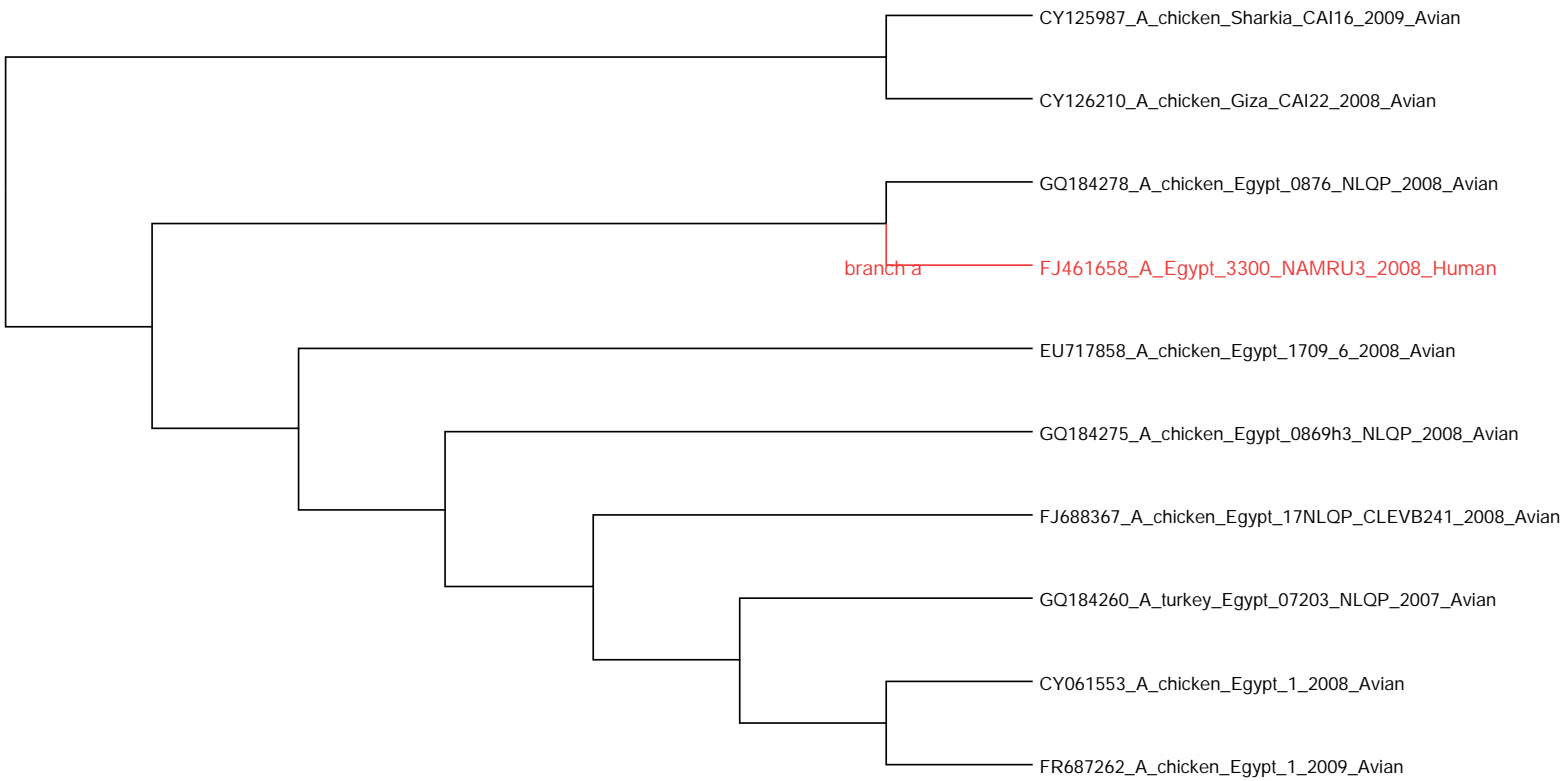



# NA1-Group25

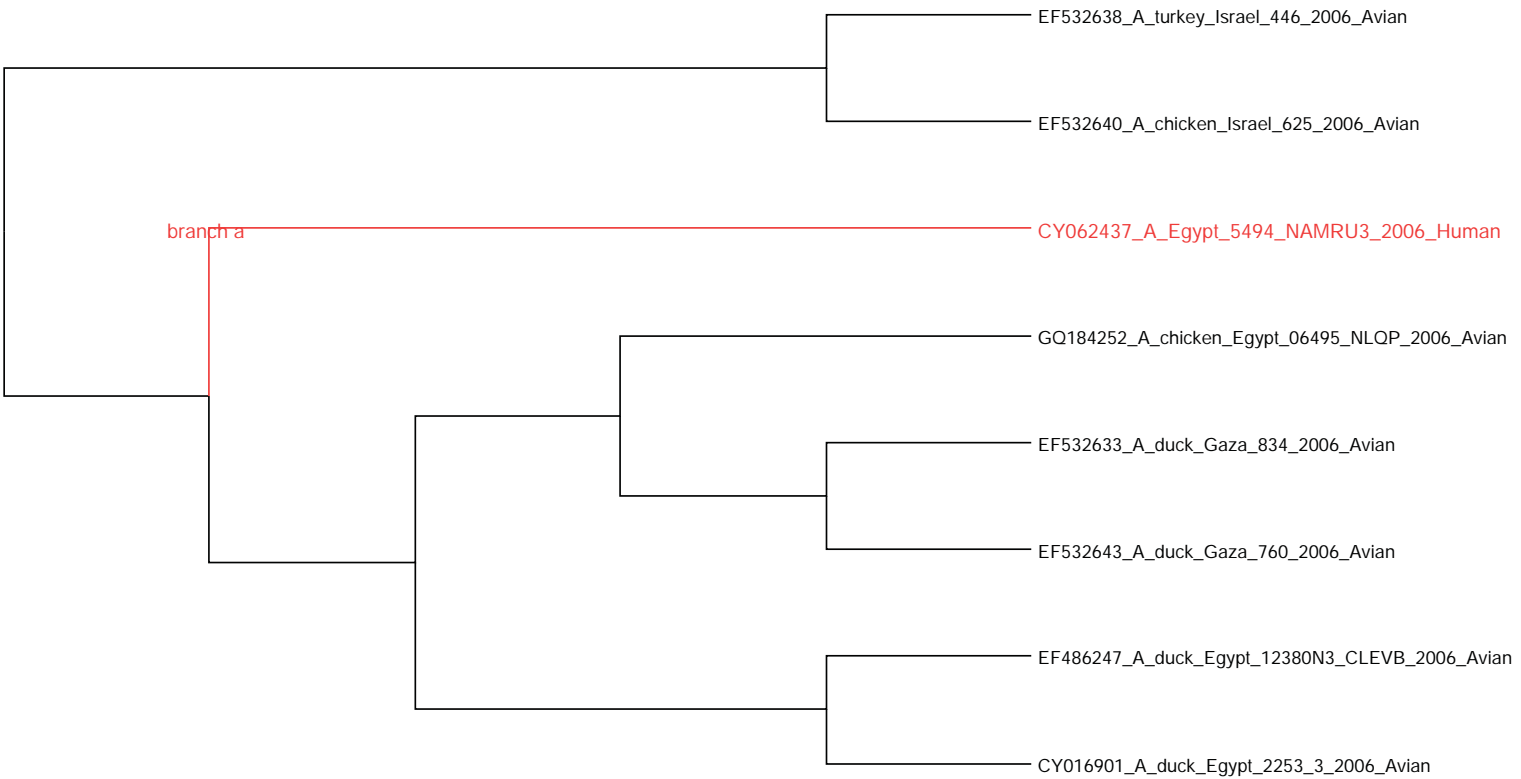

# NA1-Group26

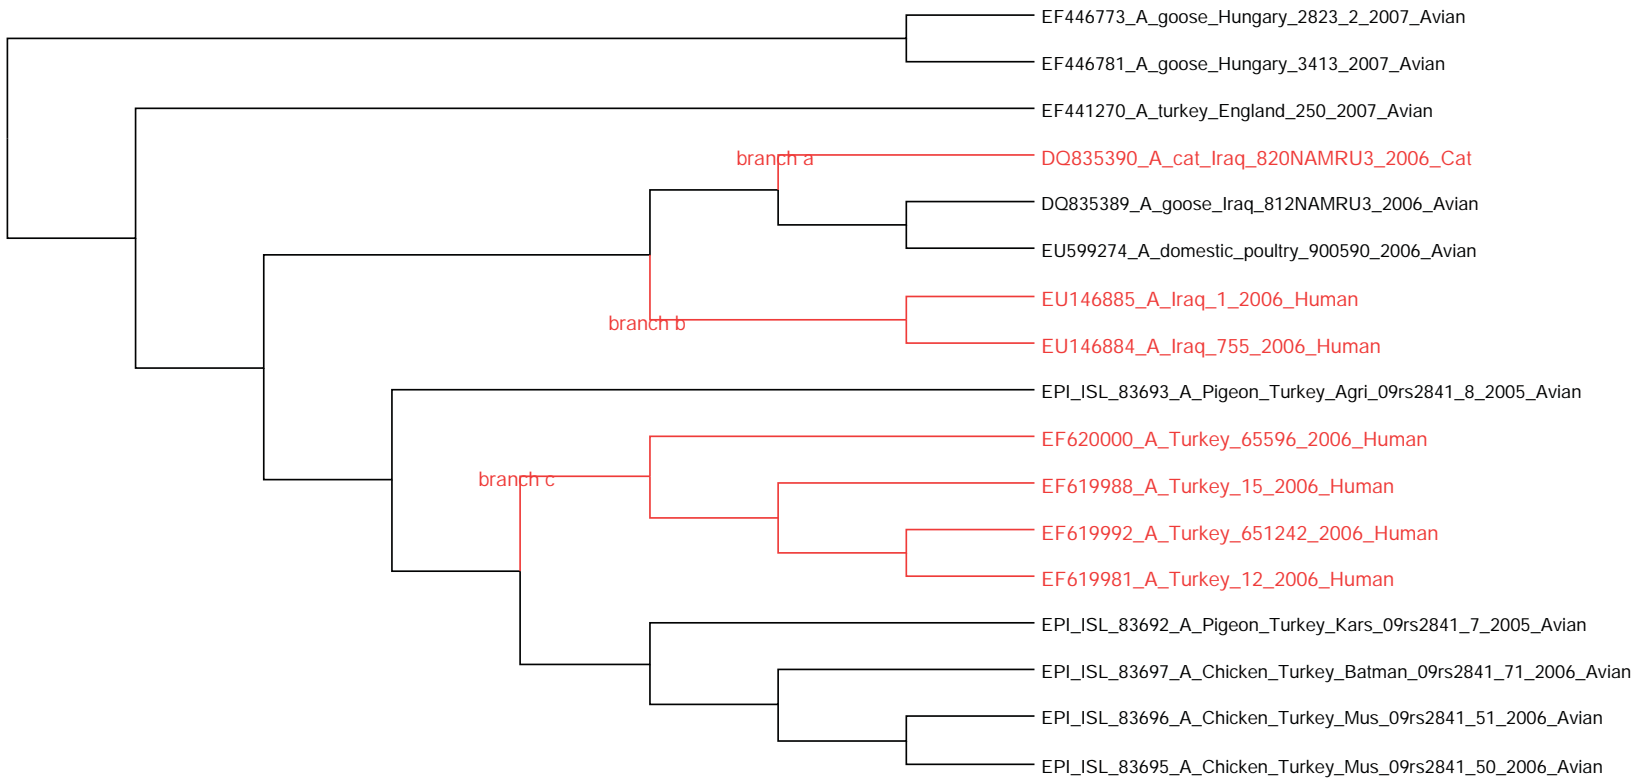

# NA1-Group27

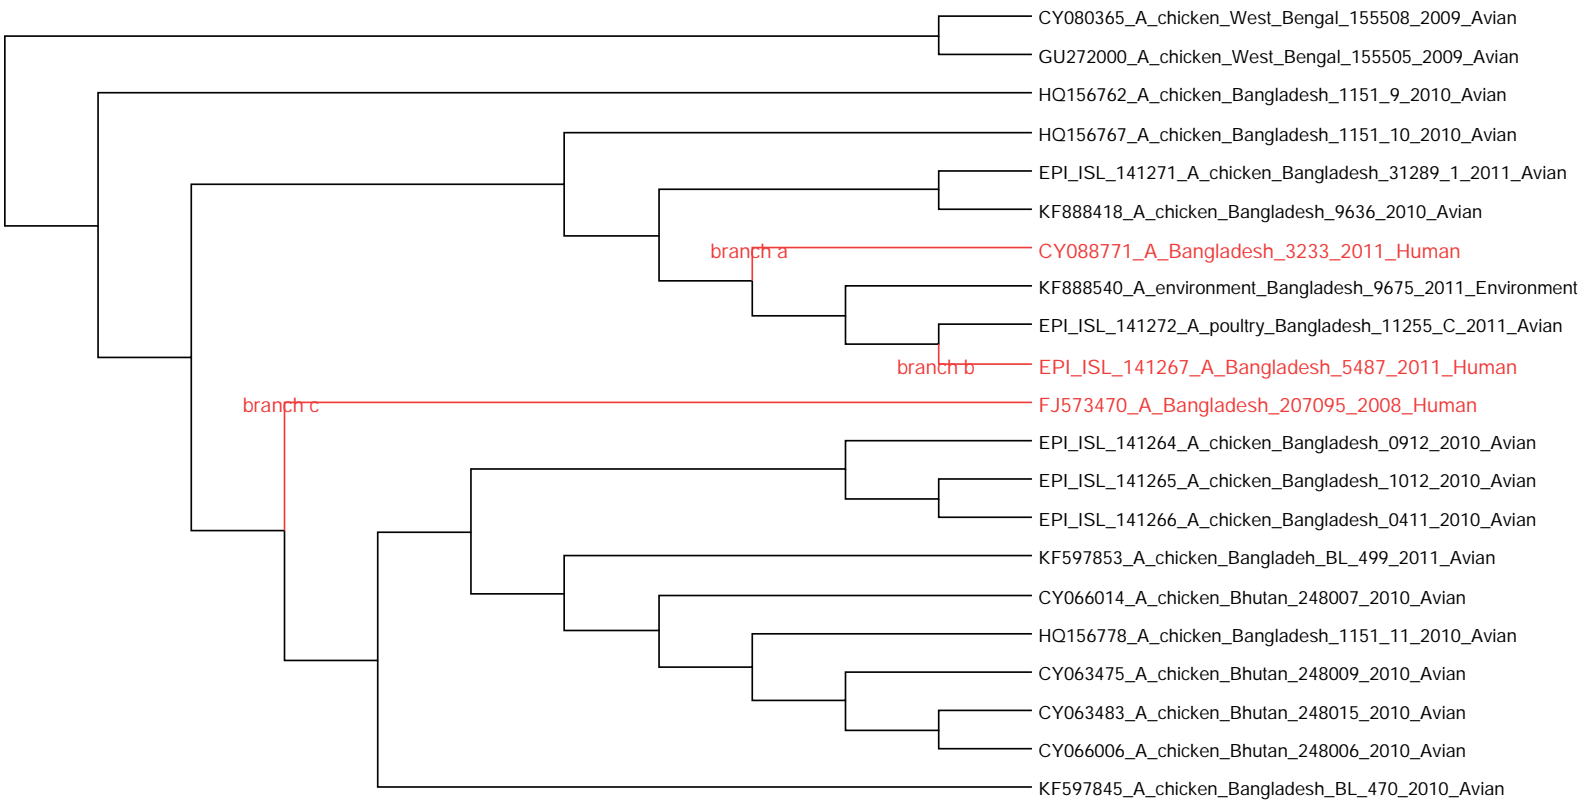

# NA1-Group28

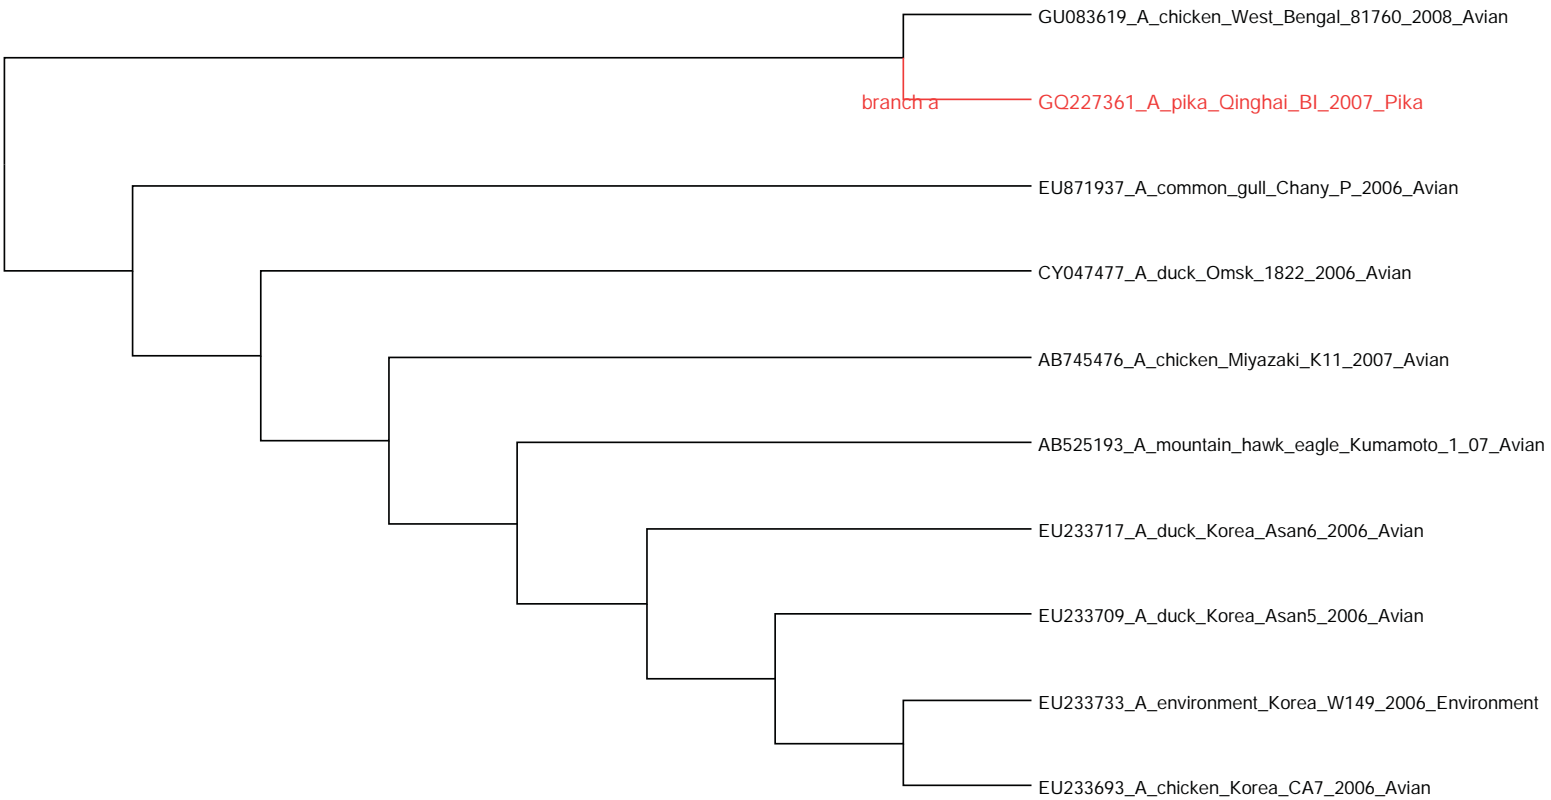

# NA1-Group29

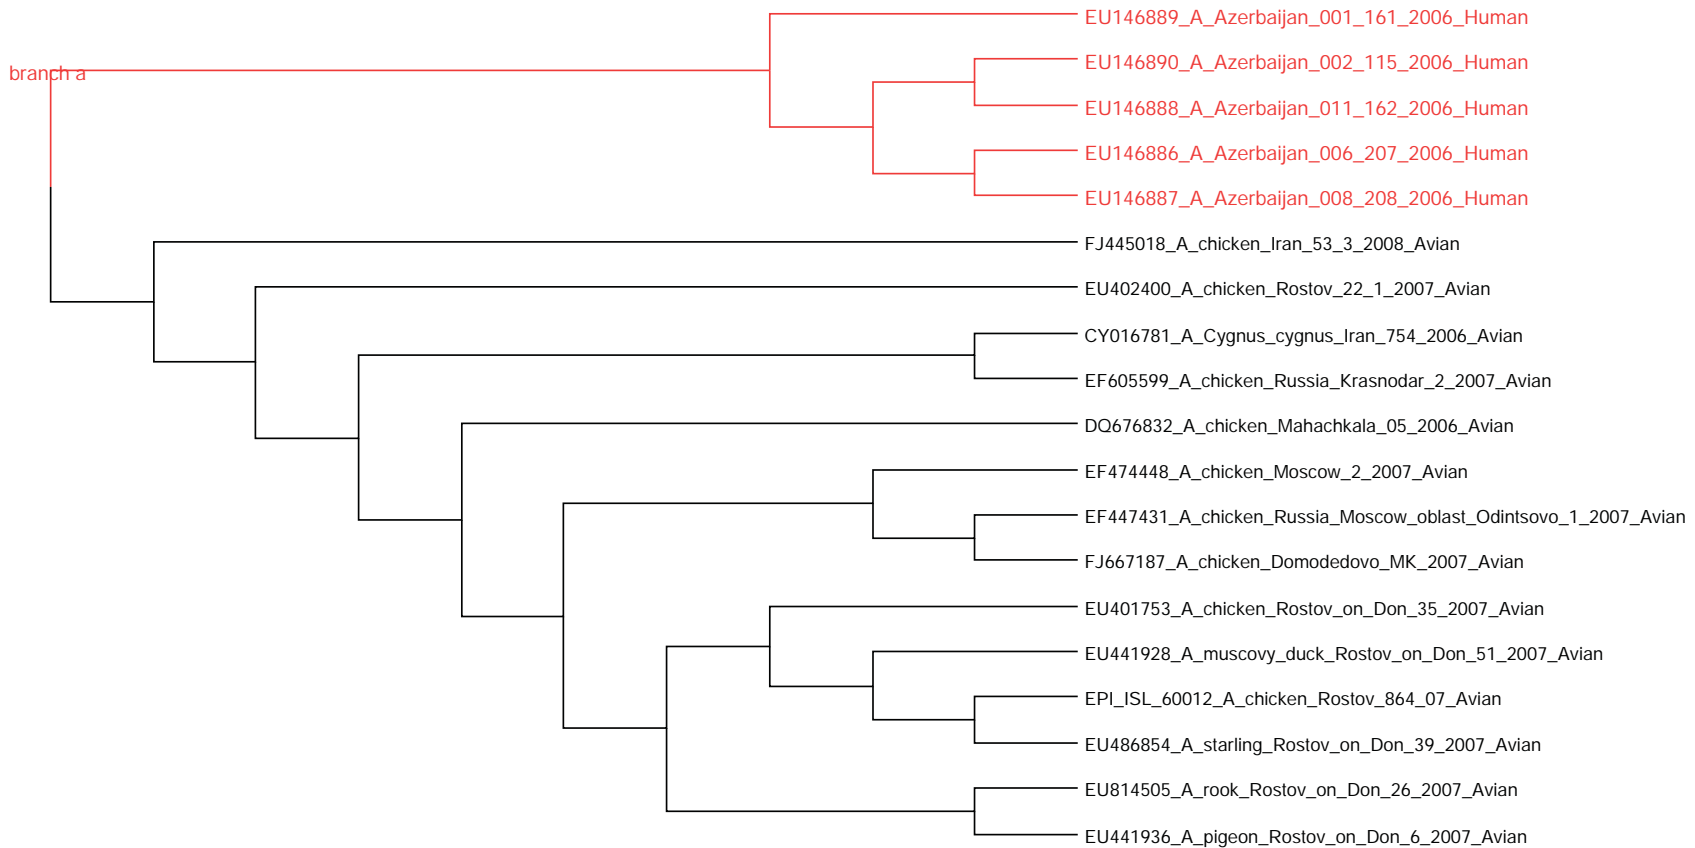

# NA1-Group30

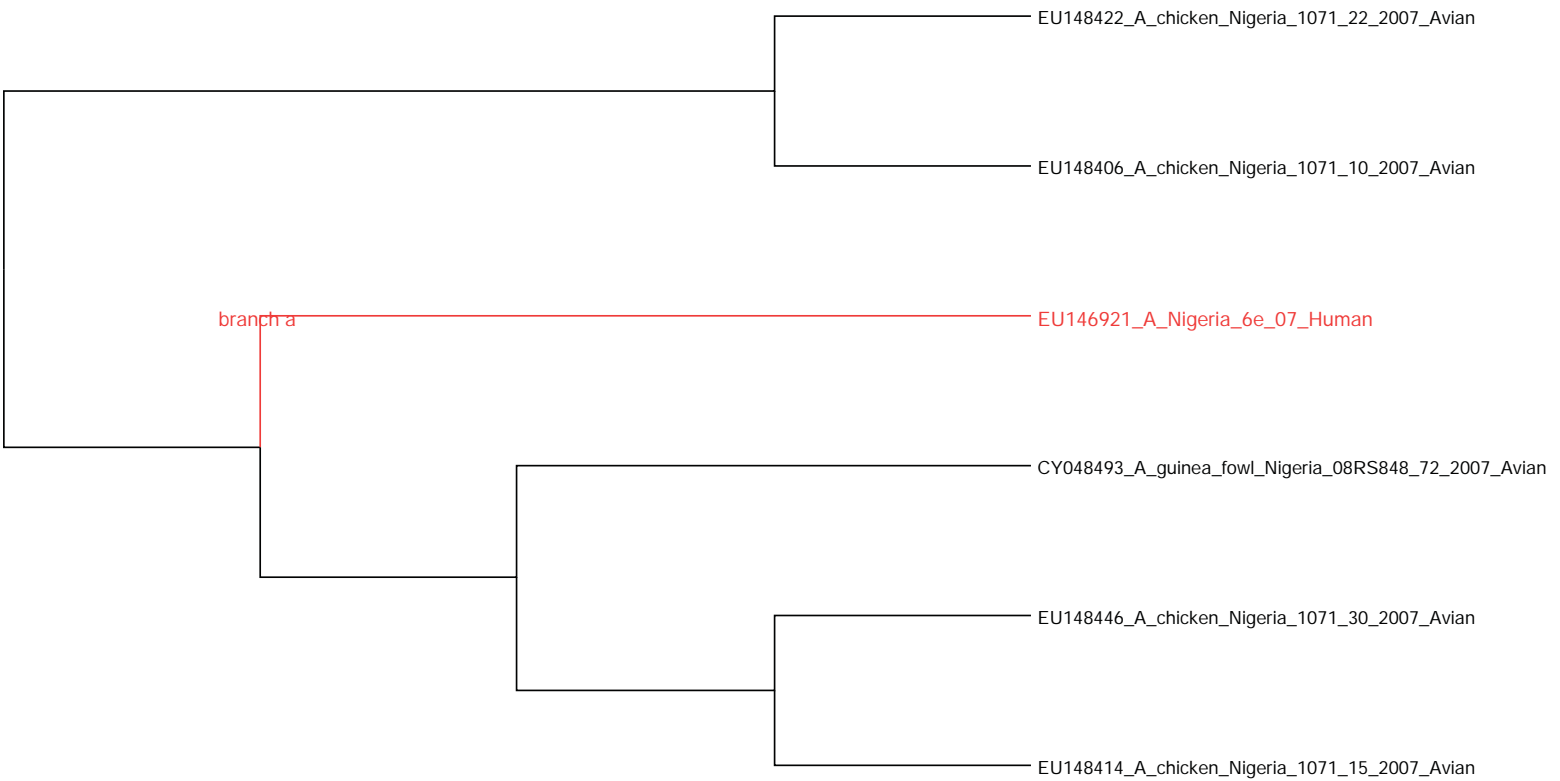

# NA1-Group31

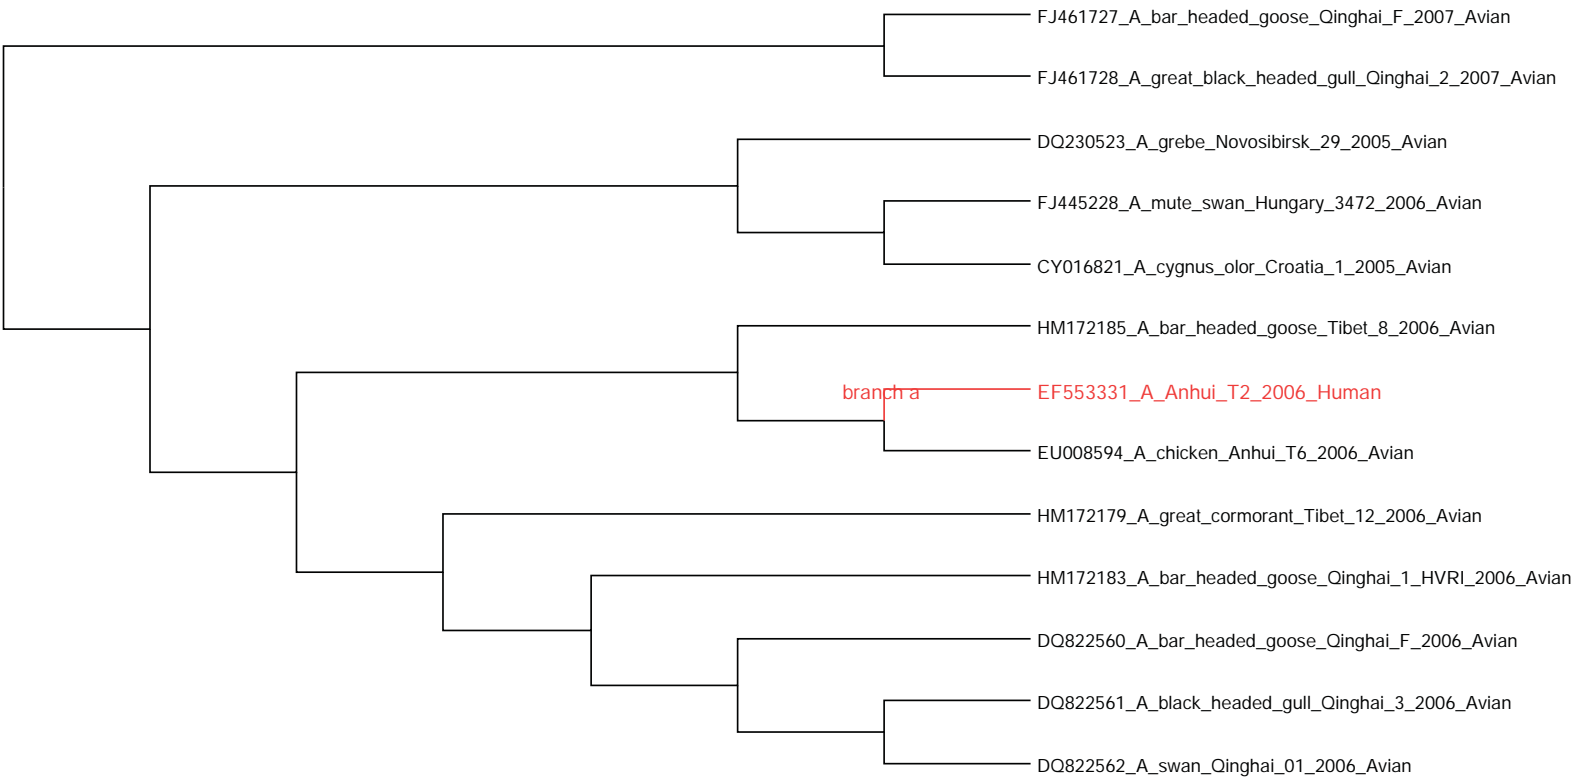

# NA1-Group32

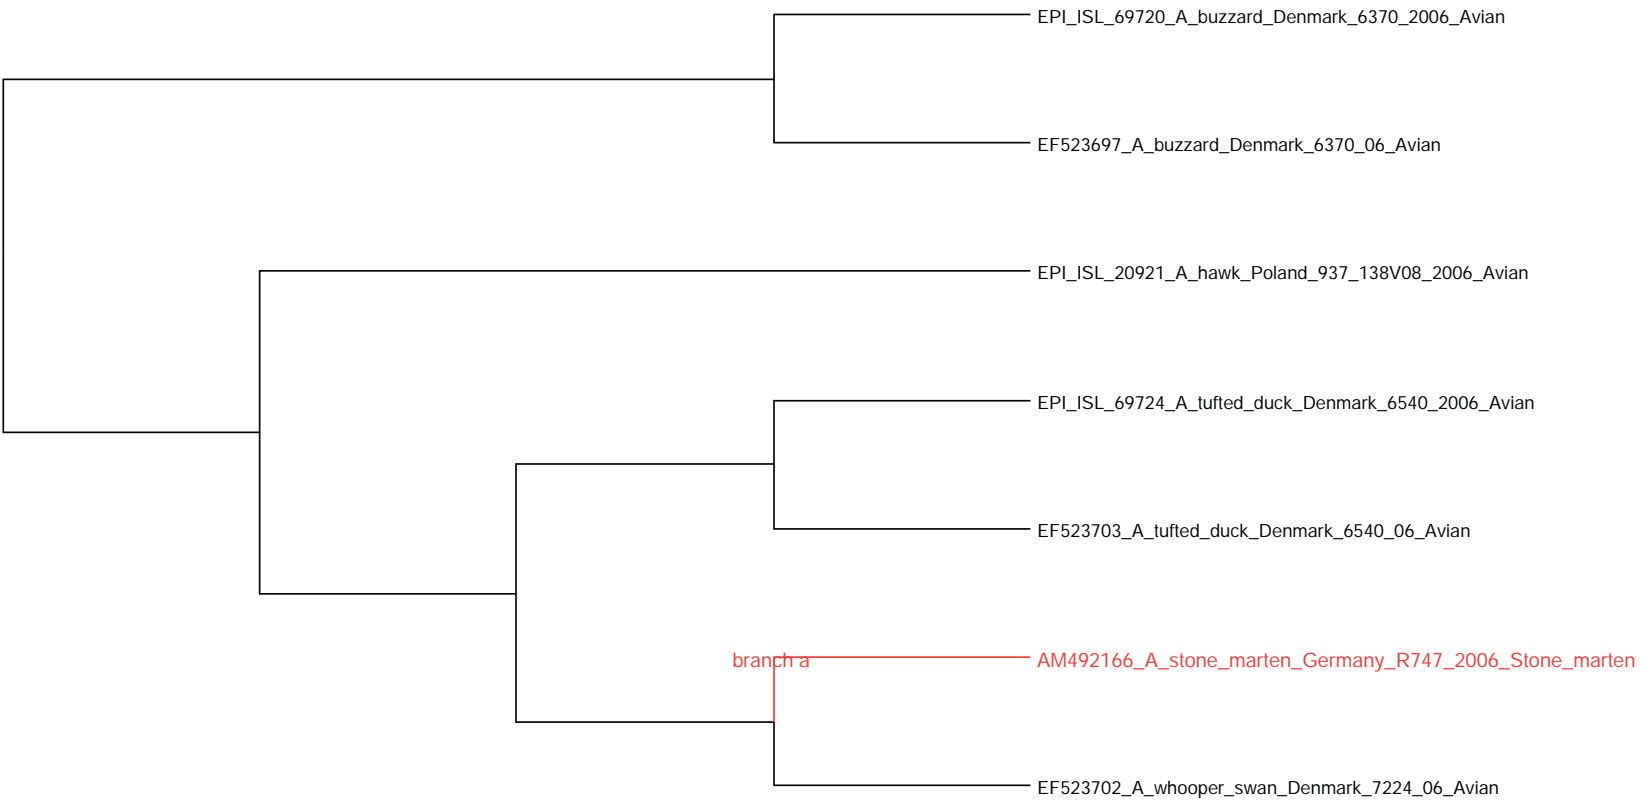



# NA1-Group33

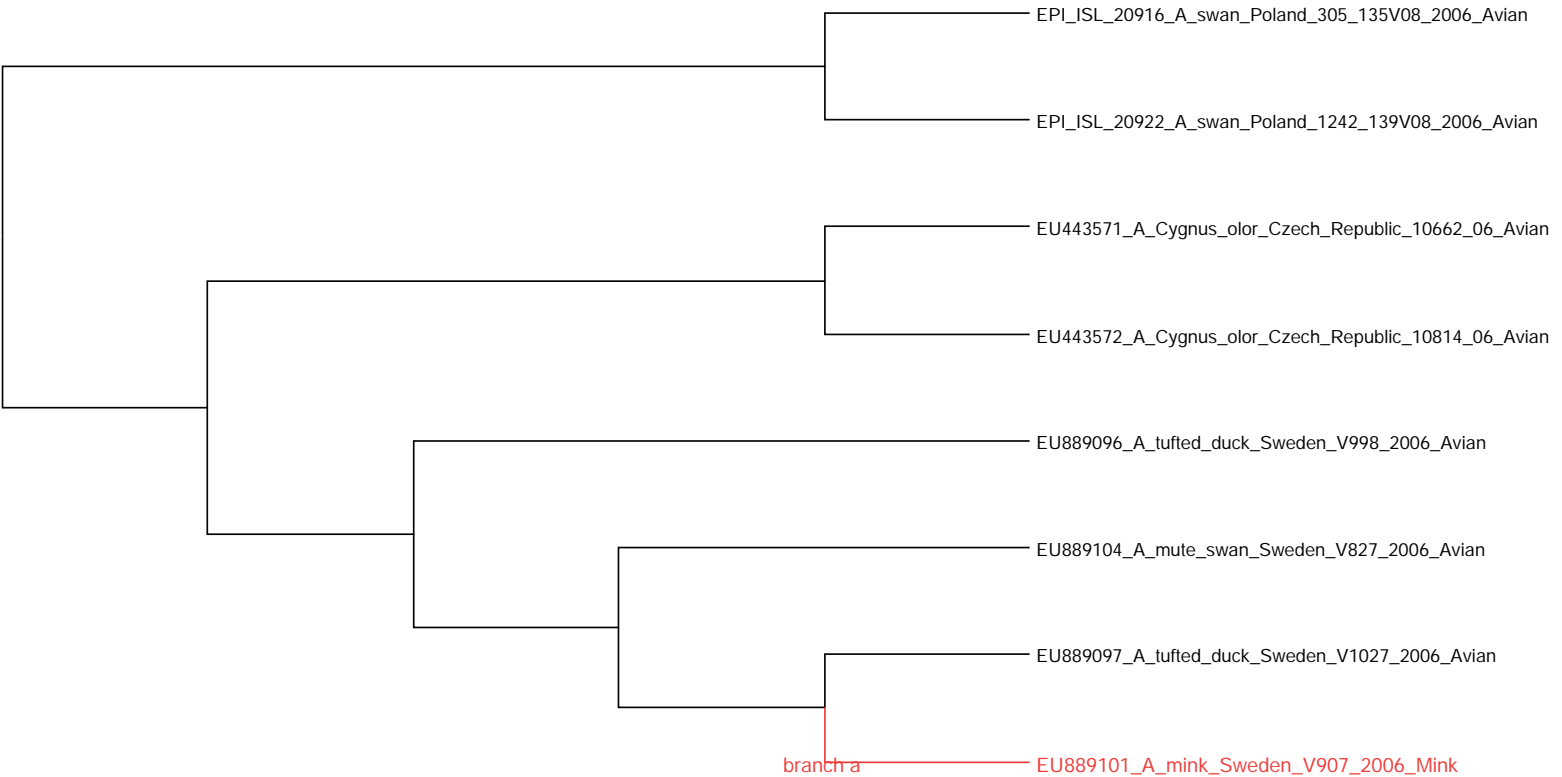

# NA1-Group34

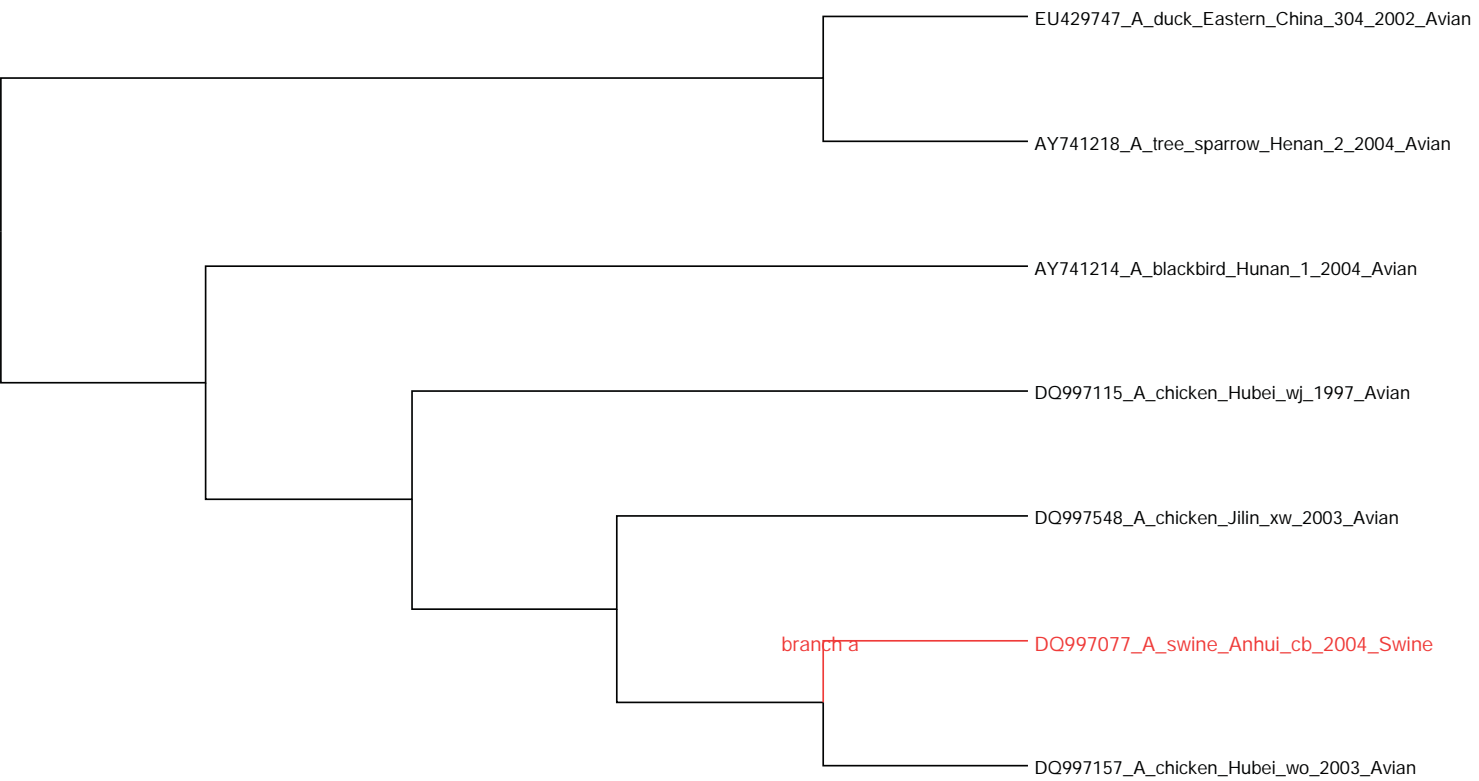

# NA1-Group35

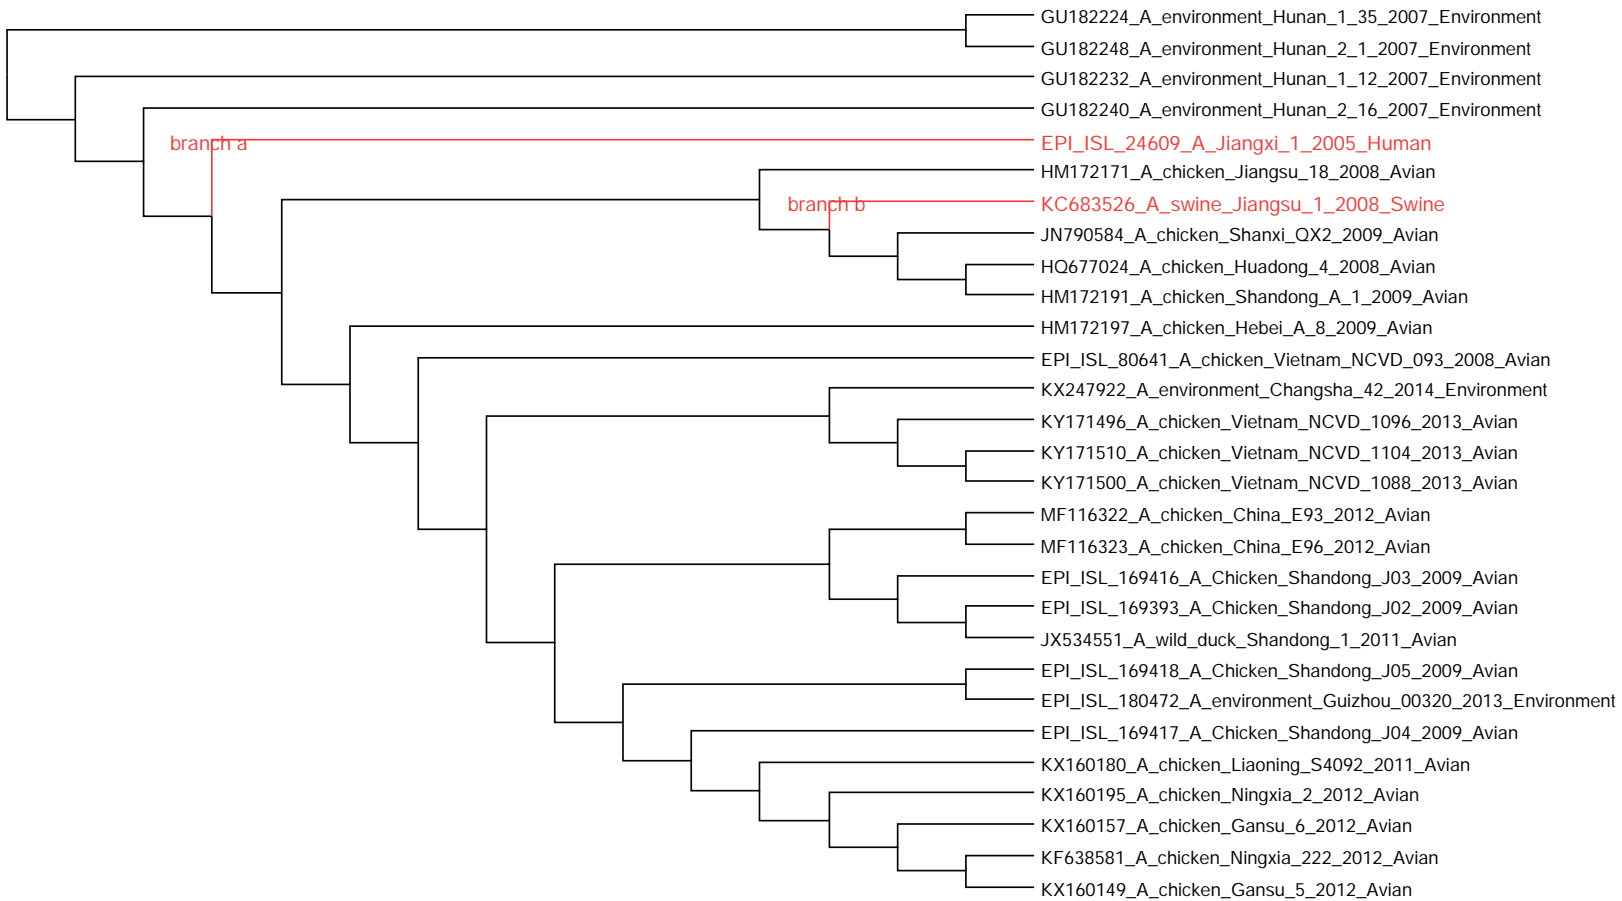

# NA1-Group36

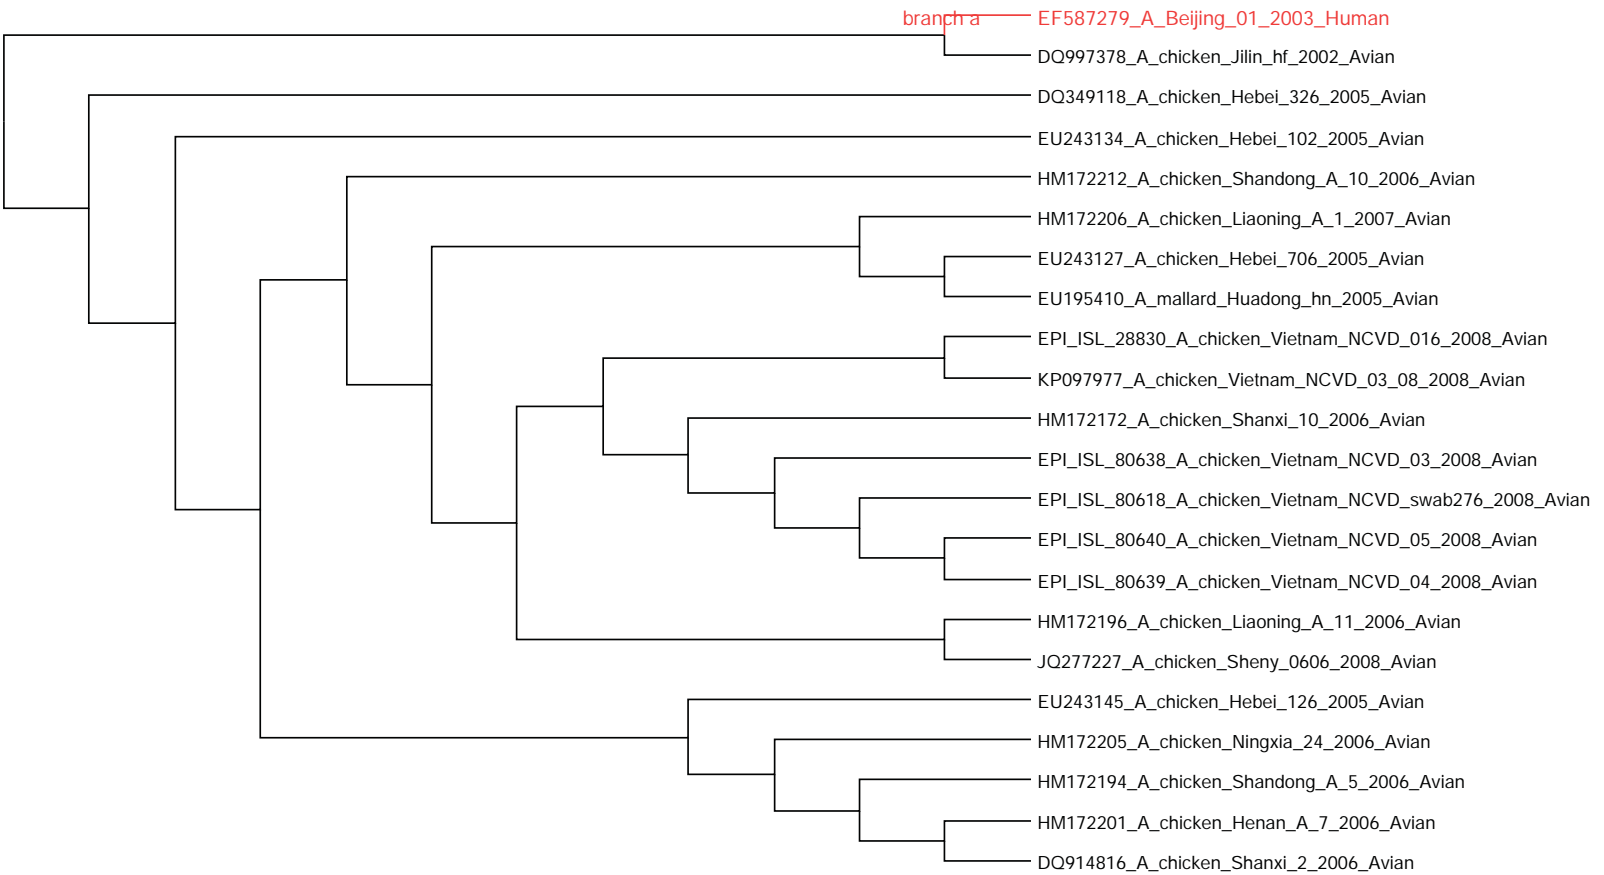

# NA1-Group37

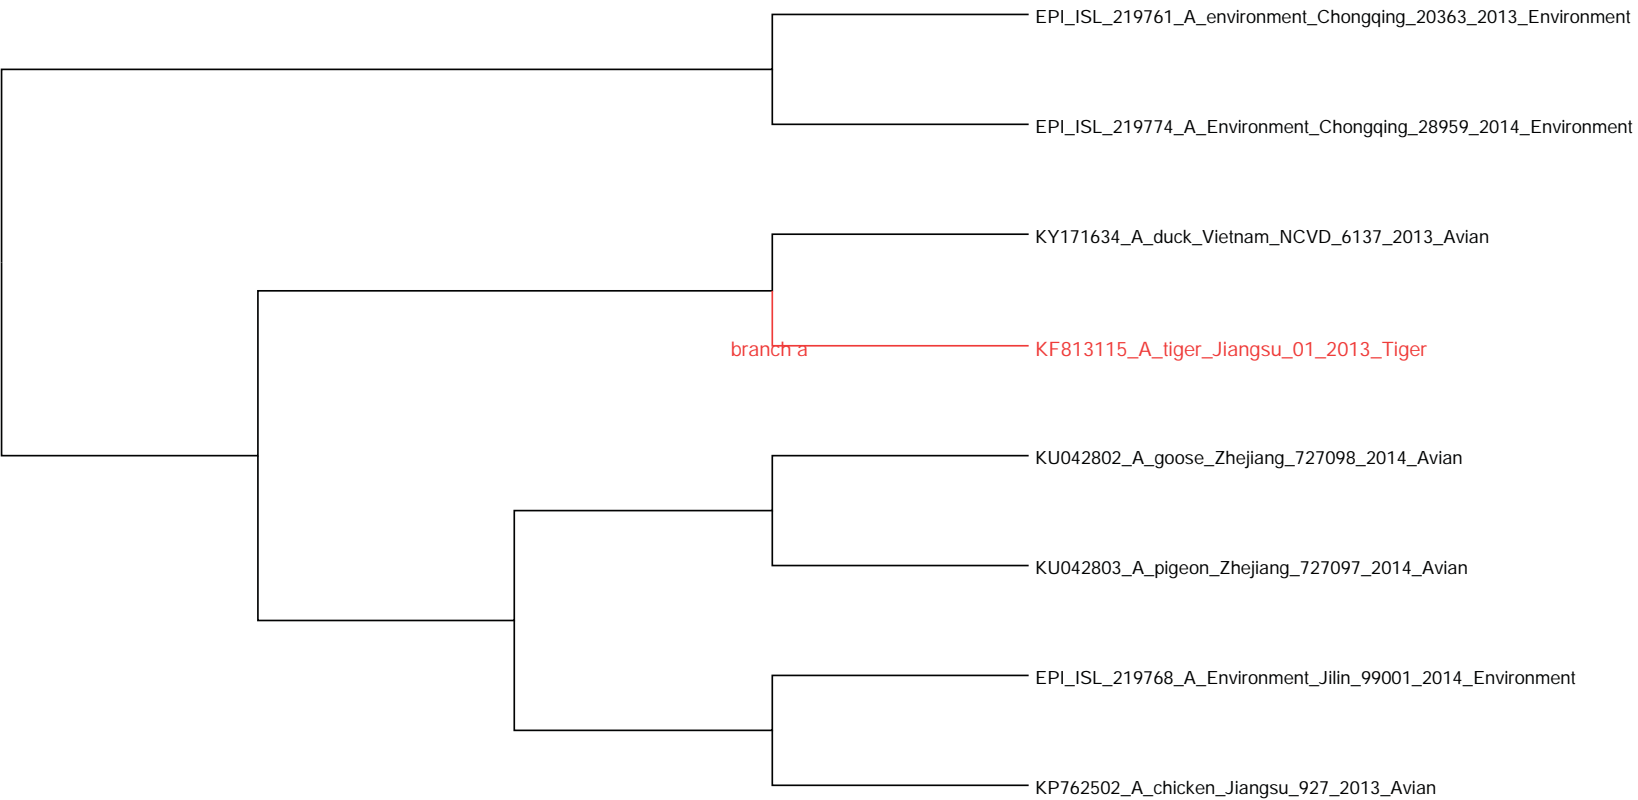

# NA1-Group38

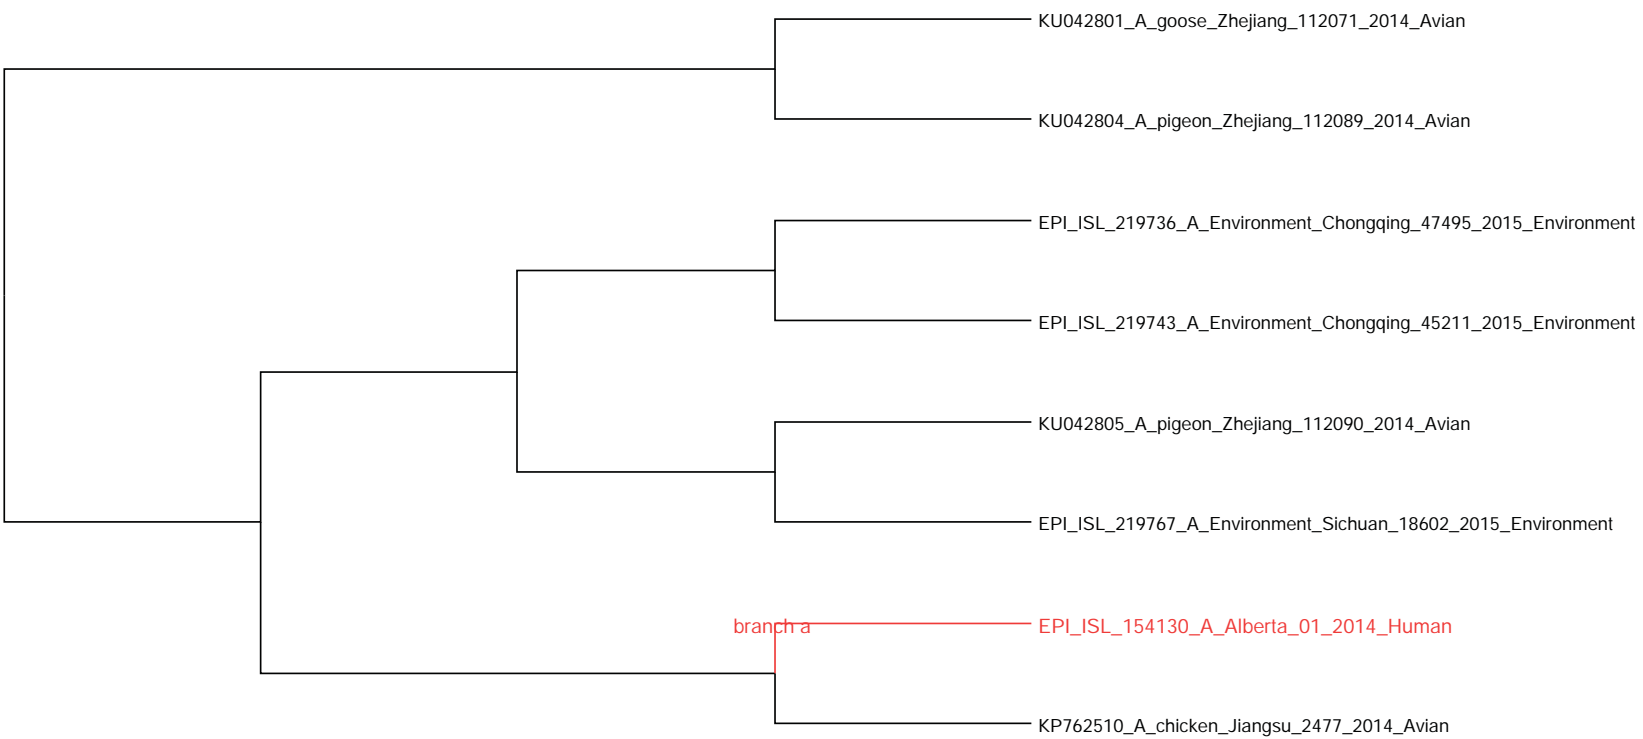

# NA1-Group39

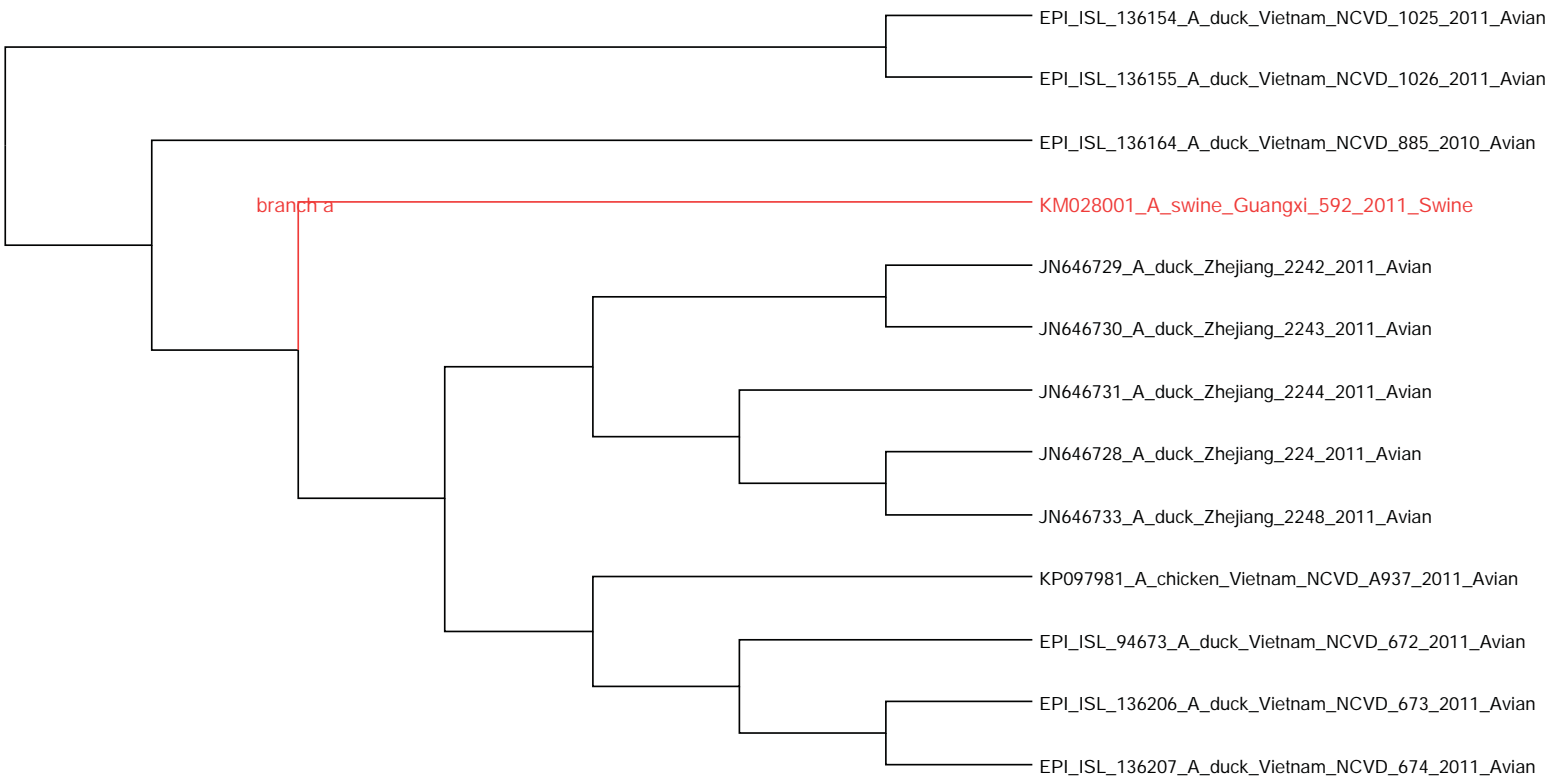

# NA1-Group40

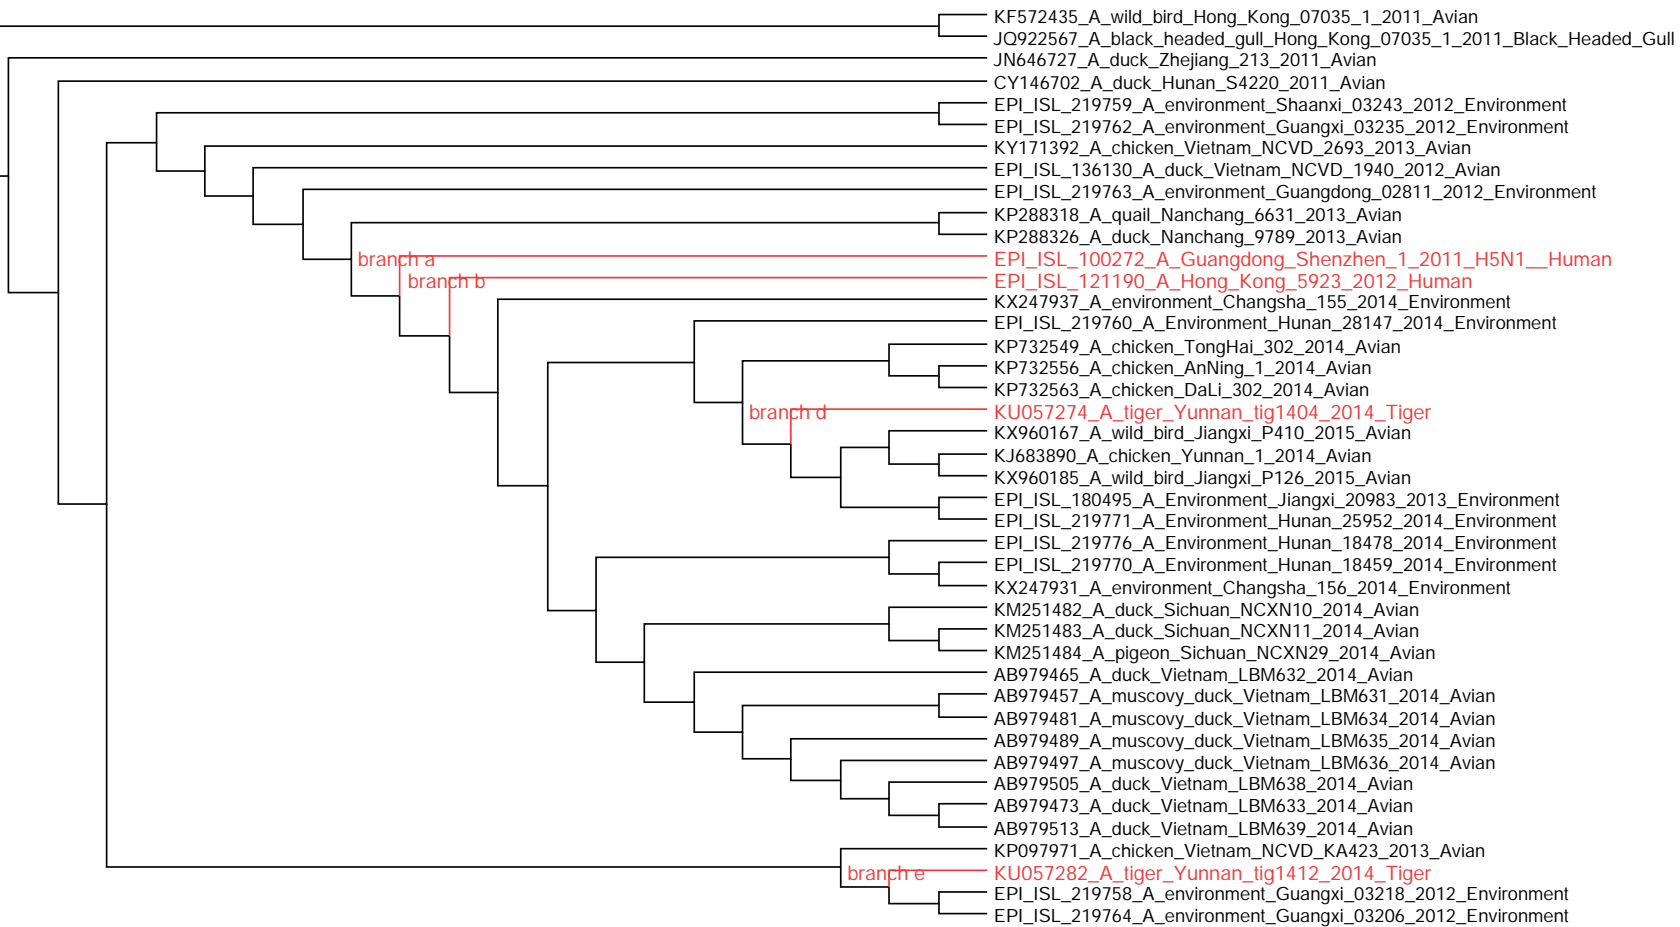



# NA1-Group41

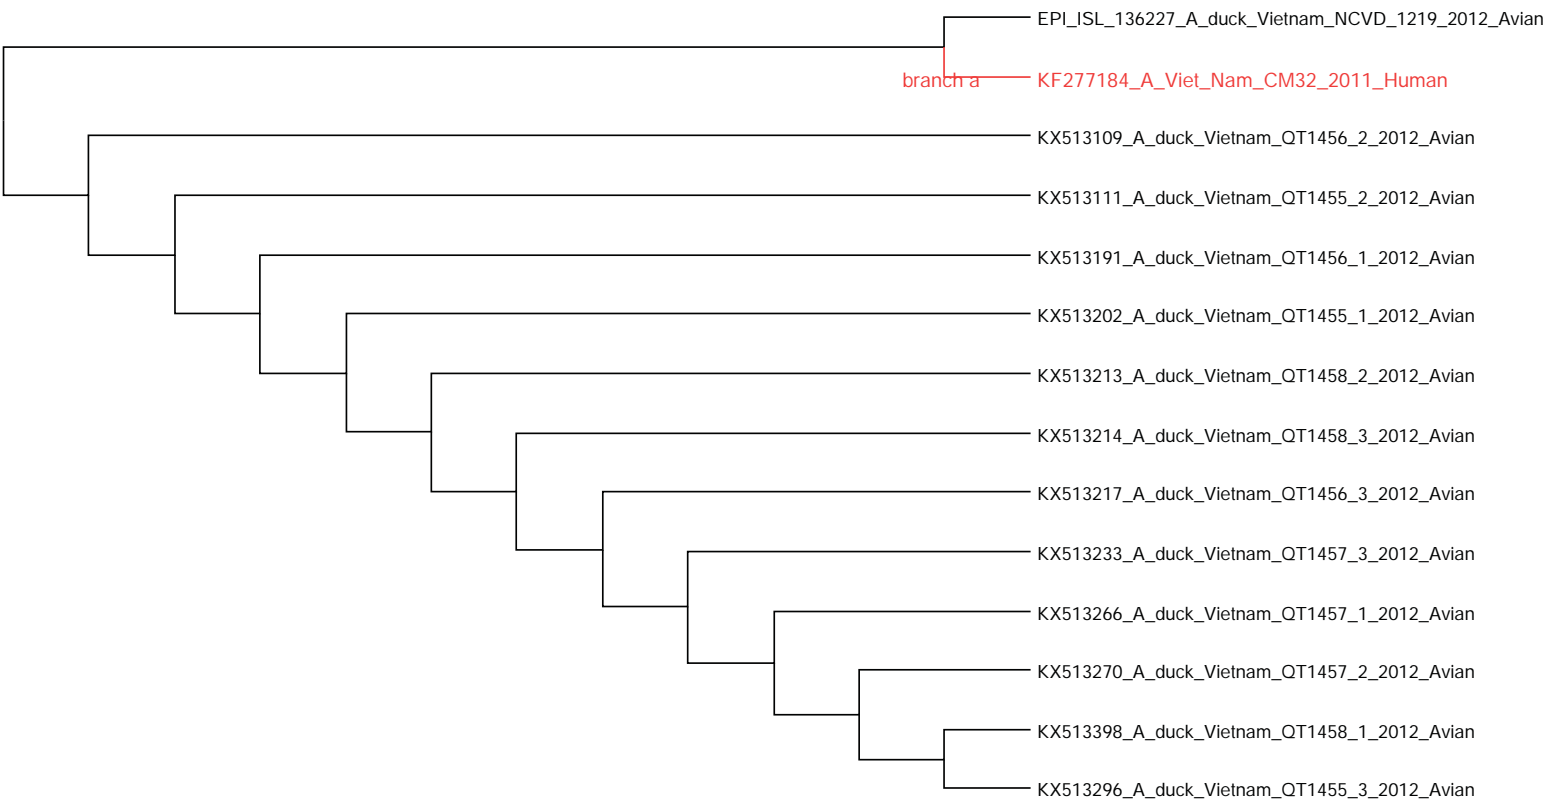

# NA1-Group42

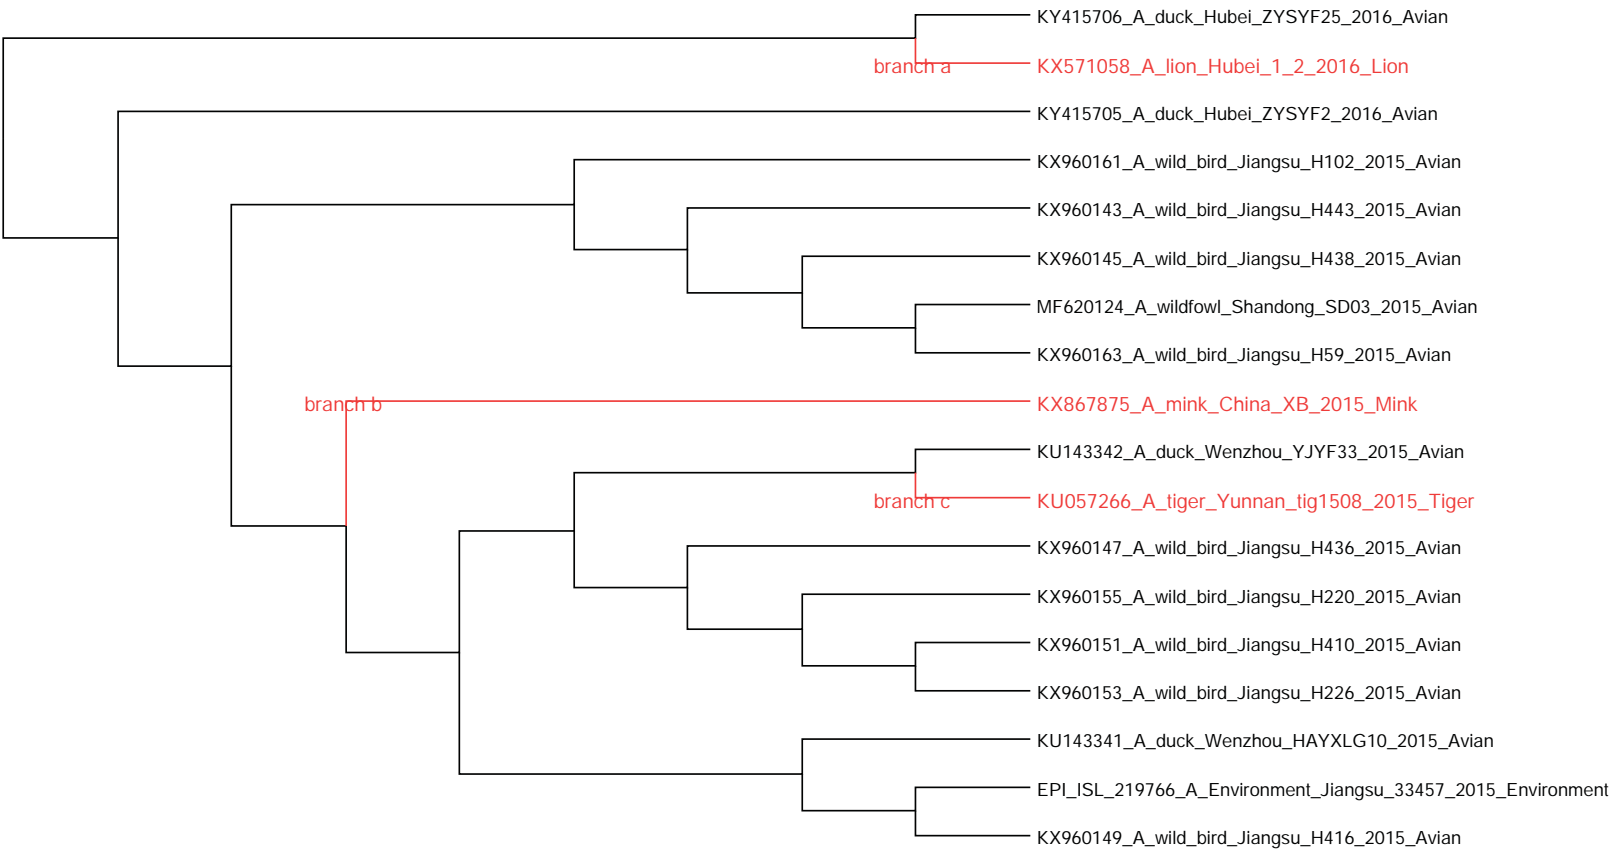

# NA1-Group43

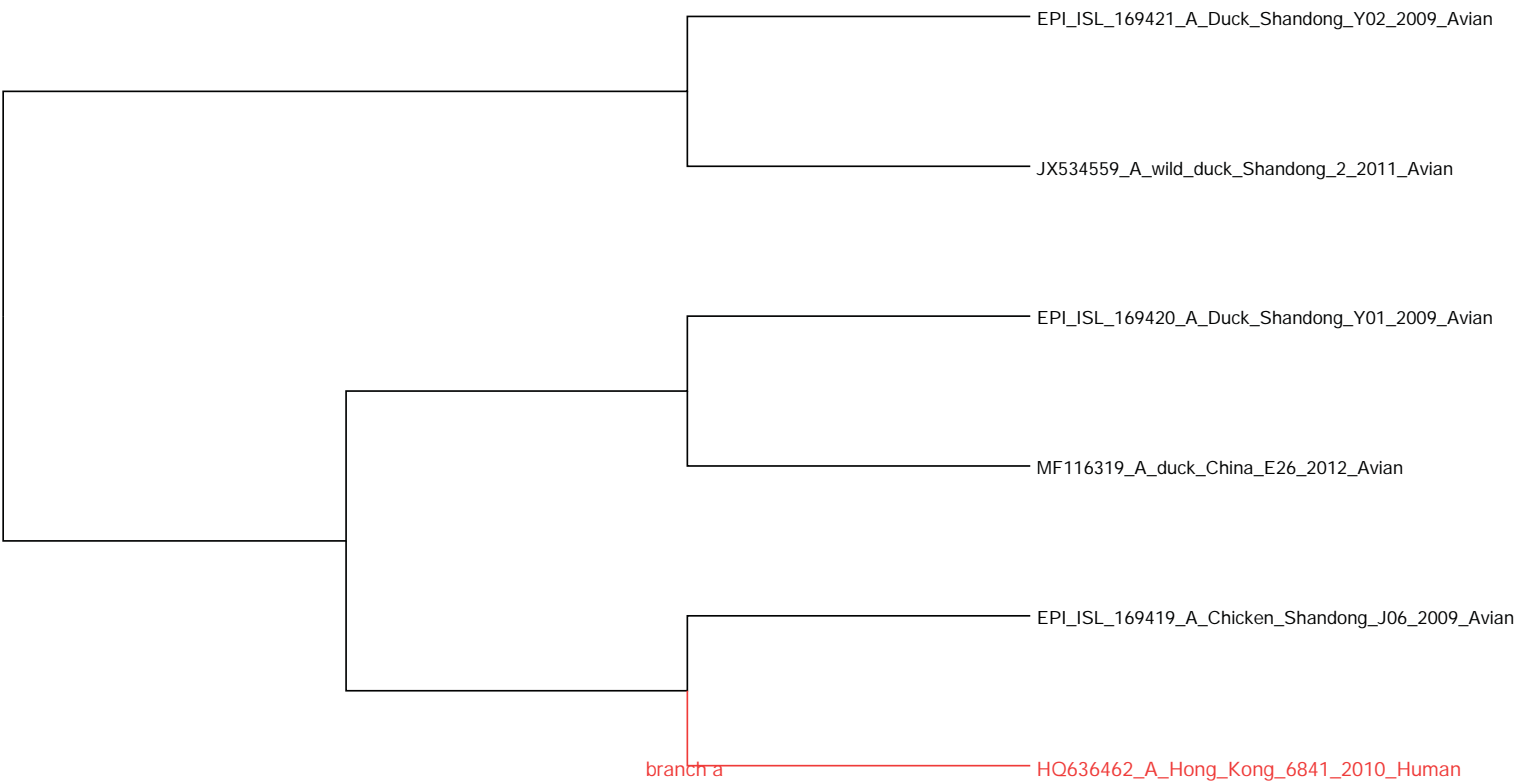

# NA1-Group44

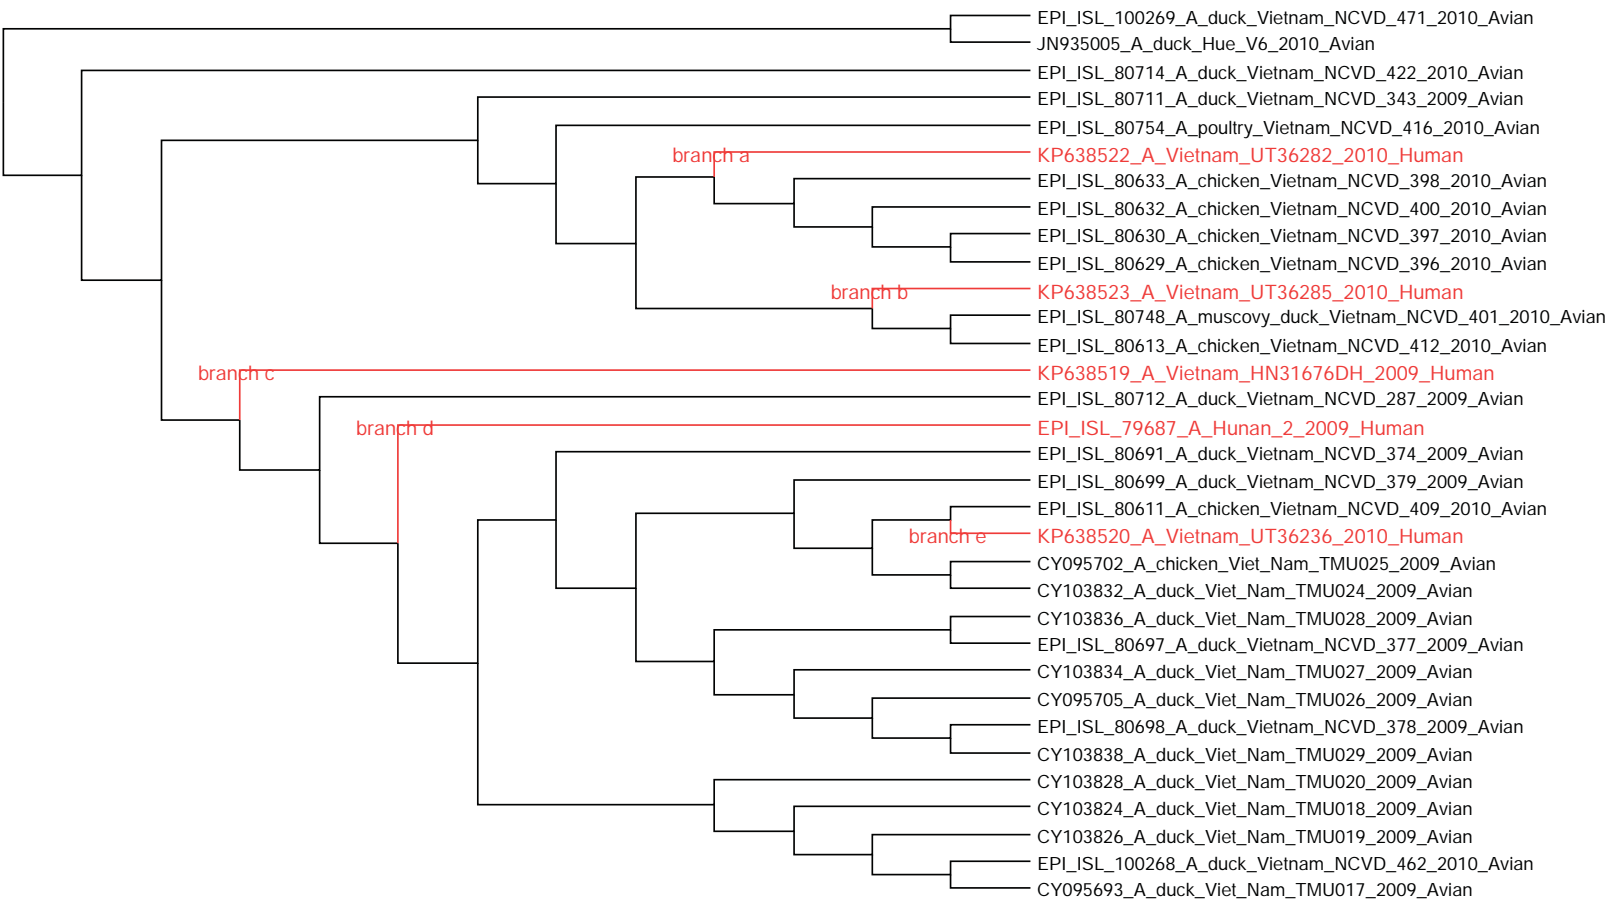

# NA1-Group45

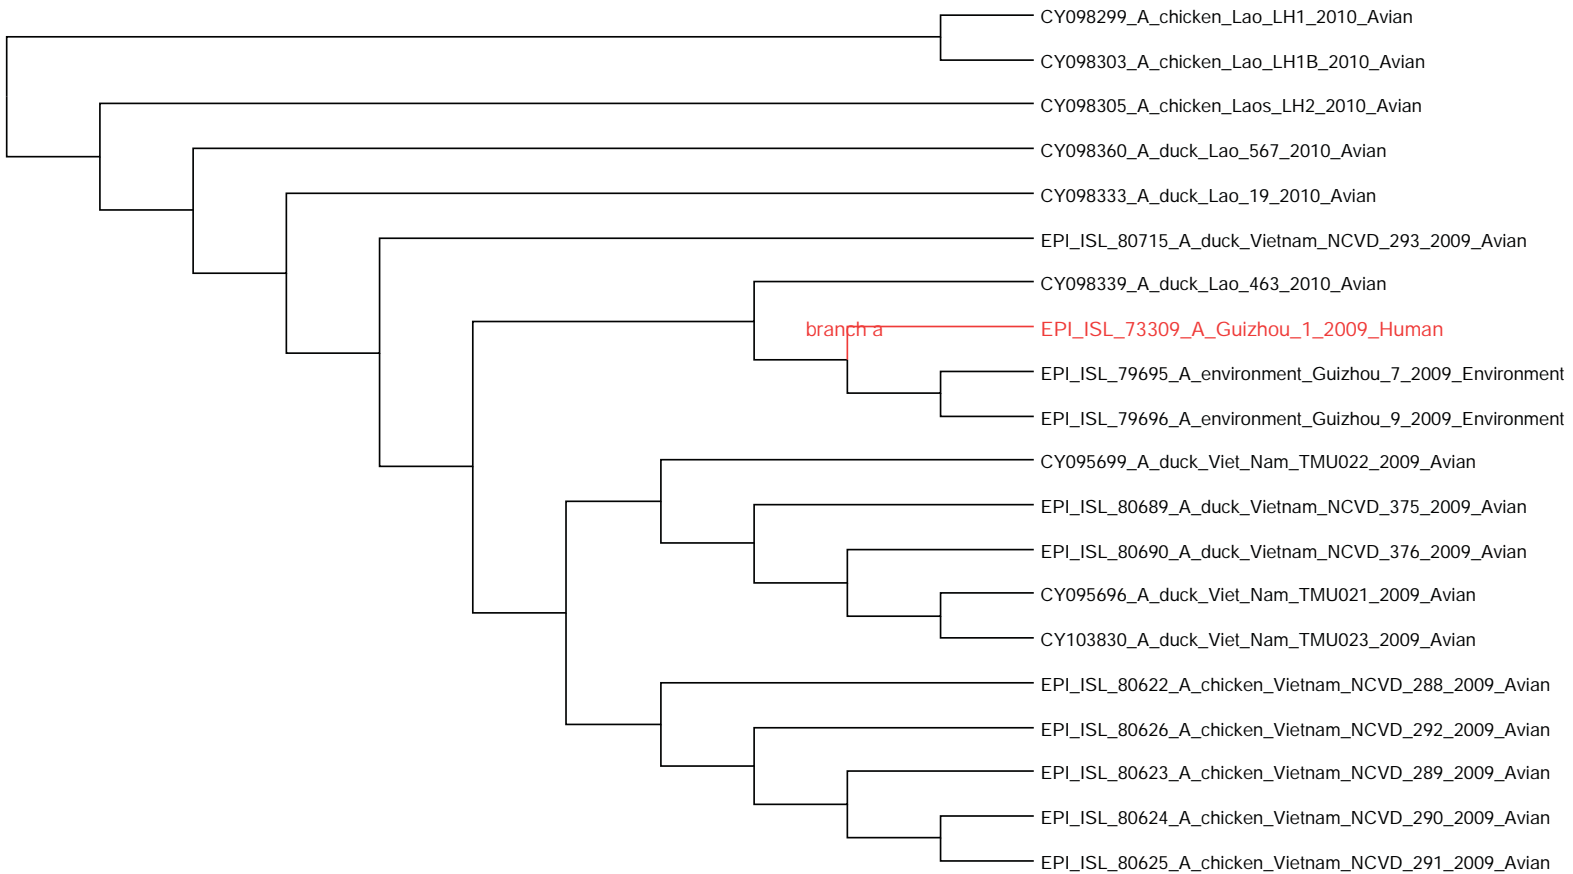

# NA1-Group46

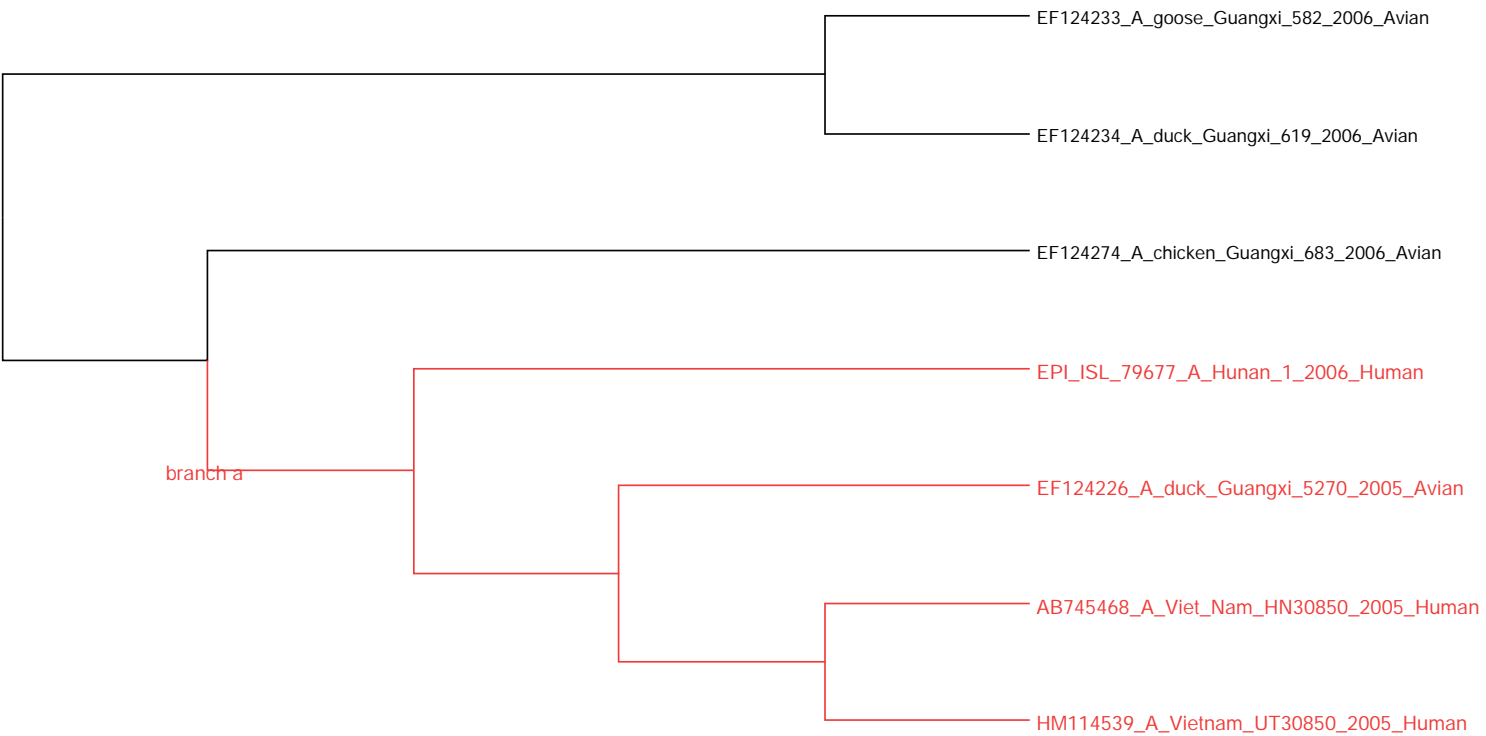

# NA1-Group47

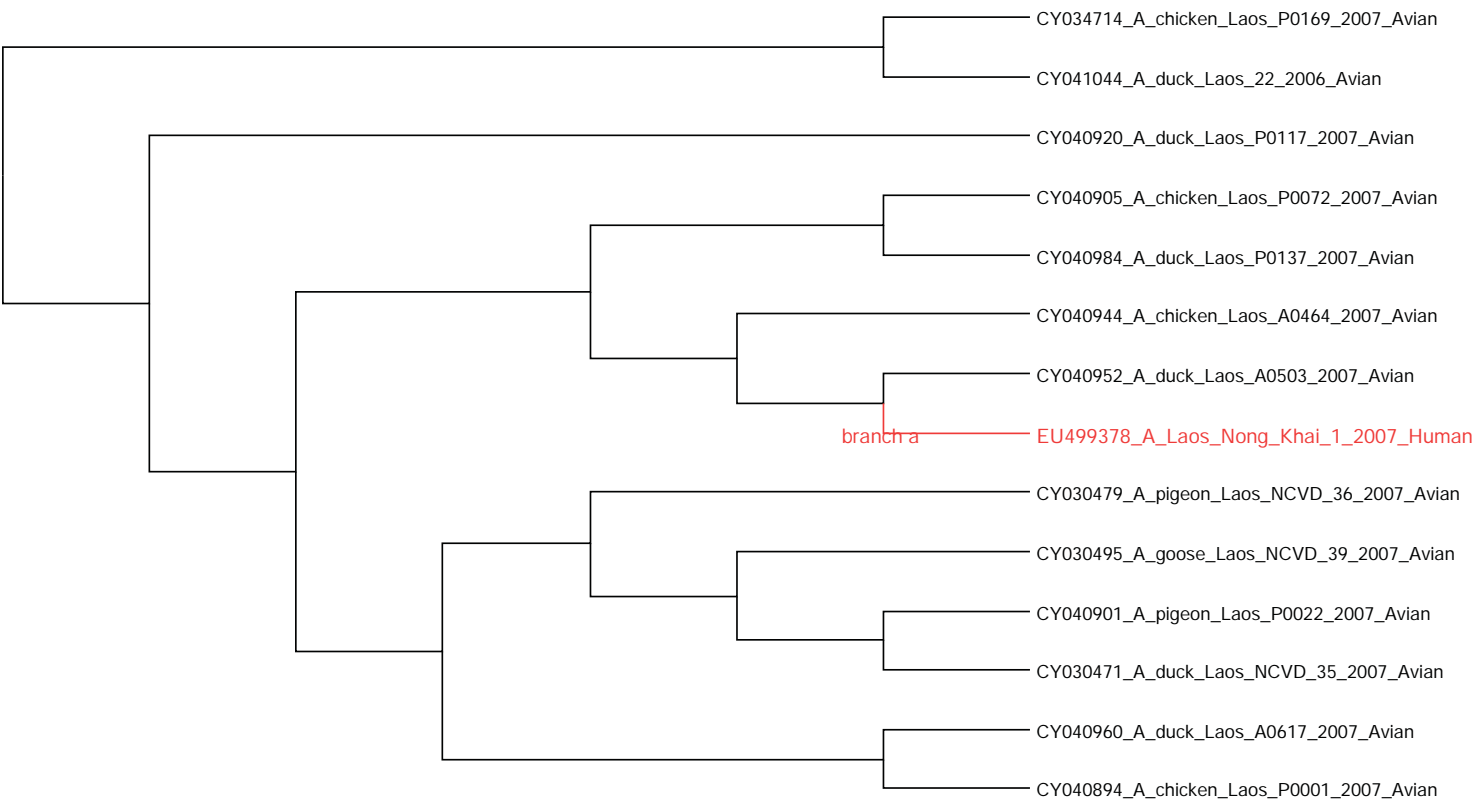

# NA1-Group48

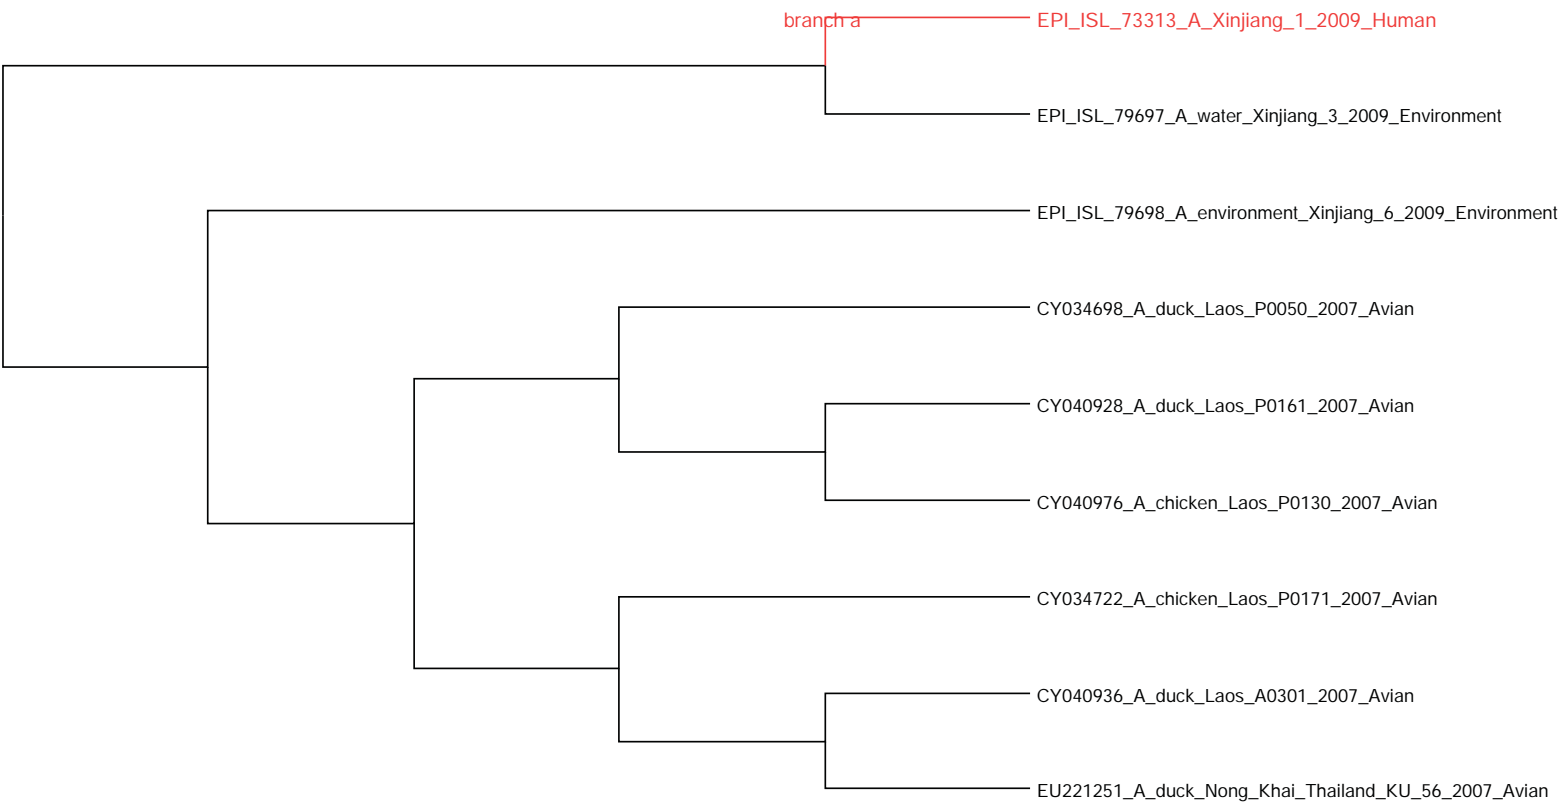



Phylogenetic tree showing relationships between 100 samples, color-coded by branch. The tree is rooted on the left and branches out to the right. The samples are listed on the right, with their accession numbers and names. The branches are labeled 'branch a' through 'branch i' in red. The samples are grouped into several clusters, with some clusters being more closely related than others. The tree is a maximum likelihood tree, and the bootstrap values are shown at the nodes.

branch a

branch c

branch b

branch d

branch e

branch f

branch g

branch h

branch i

EPI\_ISL\_79699\_A, water, Hunan, 3\_2009, Environment

HM17195\_A, chicken, Hunan, 1\_2009, Avian

HM370127\_A, duck, Eastern, China, Y122\_2008, Avian

GO202209\_A, tree\_sparrow, Jiangsu, 1\_2008, Avian

HO185381\_A, chicken, Eastern, China, XH222\_2008, Avian

EPI\_ISL\_79683\_A, Jiangsu, 1\_2007, Human

EPI\_ISL\_79684\_A, Jiangsu, 2\_2007, Human

EPI\_ISL\_80722\_A, duck, Vietnam, NCVD\_013\_2008, Avian

KC683527\_A, swine, Jiangsu, 2\_2009, Swine

EPI\_ISL\_73306\_A, Guangdong, 1\_2008, Human

FJ784762\_A, chicken, Anhui, 1089\_2007, Avian

EU429719\_A, duck, Eastern, China, 48\_2006, Avian

EU429778\_A, duck, Eastern, China, 37\_2006, Avian

EU429785\_A, duck, Eastern, China, 89\_2006, Avian

CY040992\_A, chicken, Laos, 13\_2008, Avian

AB435523\_A, chicken, Laos, 1\_2008, Avian

CY041008\_A, chicken, Laos, 17\_2008, Avian

CY041016\_A, chicken, Laos, 33\_2008, Avian

GU127619\_A, duck, Eastern, China, 909\_2009, Avian

GU596986\_A, duck, Shandong, 009\_2008, Avian

EPI\_ISL\_79685\_A, Beijing, 1\_2009, Human

EPI\_ISL\_79691\_A, water, Hebei, 3\_2009, Environment

EPI\_ISL\_79689\_A, water, Hebei, 1\_2009, Environment

EPI\_ISL\_79692\_A, duck, feces, Hebei, 5\_2009, Environment

EPI\_ISL\_79690\_A, water, Hebei, 2\_2009, Environment

CY041024\_A, chicken, Laos, 35\_2008, Avian

CY041032\_A, chicken, Laos, 37\_2008, Avian

FJ784763\_A, chicken, Henan, 1362\_2006, Avian

FJ784771\_A, chicken, Hubei, 2856\_2007, Avian

KC436121\_A, goose, Guangdong, 1051\_2008, Avian

EF124271\_A, duck, Fujian, 720\_2006, Avian

EF124269\_A, duck, Fujian, 668\_2006, Avian

EF124270\_A, duck, Fujian, 671\_2006, Avian

EU594351\_A, duck, Hubei, Hangmei01\_2006, Avian

FJ169865\_A, duck, Laos, 3295\_2006, Avian

EF124302\_A, duck, Guiyang, 3834\_2005, Avian

EF124303\_A, duck, Guiyang, 3996\_2005, Avian

EF124314\_A, goose, Guiyang, 4030\_2005, Avian

EF124237\_A, chicken, Guiyang, 3721\_2005, Avian

EF124240\_A, duck, Guiyang, 293\_2006, Avian

EF124238\_A, chicken, Guiyang, 4059\_2005, Avian

EF124241\_A, duck, Guiyang, 497\_2006, Avian

EF124313\_A, chicken, Guiyang, 3923\_2005, Avian

EF124242\_A, goose, Guiyang, 538\_2006, Avian

HM171266\_A, duck, Hubei, 49\_2005, Avian

KP638524\_A, wildbird, Anhui, 82\_2005, Avian

EPI\_ISL\_24606\_A, Anhui, 2\_2005, Human

HM171282\_A, duck, Anhui, 1\_06, Avian

EPI\_ISL\_24603\_A, Anhui, 1\_2005, Human

EPI\_ISL\_73302\_A, Anhui, 1\_2007, Human

GU182276\_A, environment, Hunan, 1\_8\_2007, Environment

CY036159\_A, long\_tailed\_shrike, Hong\_Kong, 2762\_2007, Avian

CY036135\_A, scaly\_breasted\_munia, Hong\_Kong, 2433\_2007, Avian

CY036143\_A, chestnut\_munia, Hong\_Kong, 2442\_2007, Avian

DO643810\_A, Zhejiang, 16\_2006, Human

HM172168\_A, goose, Hubei, 65\_2005, Avian

HO185382\_A, chicken, Eastern, China, XZ235\_2008, Avian

EPI\_ISL\_73312\_A, Shandong, 1\_2009, Human

HO185383\_A, duck, Eastern, China, JS017\_2009, Avian

# N/A1-Group49

# NA1-Group50

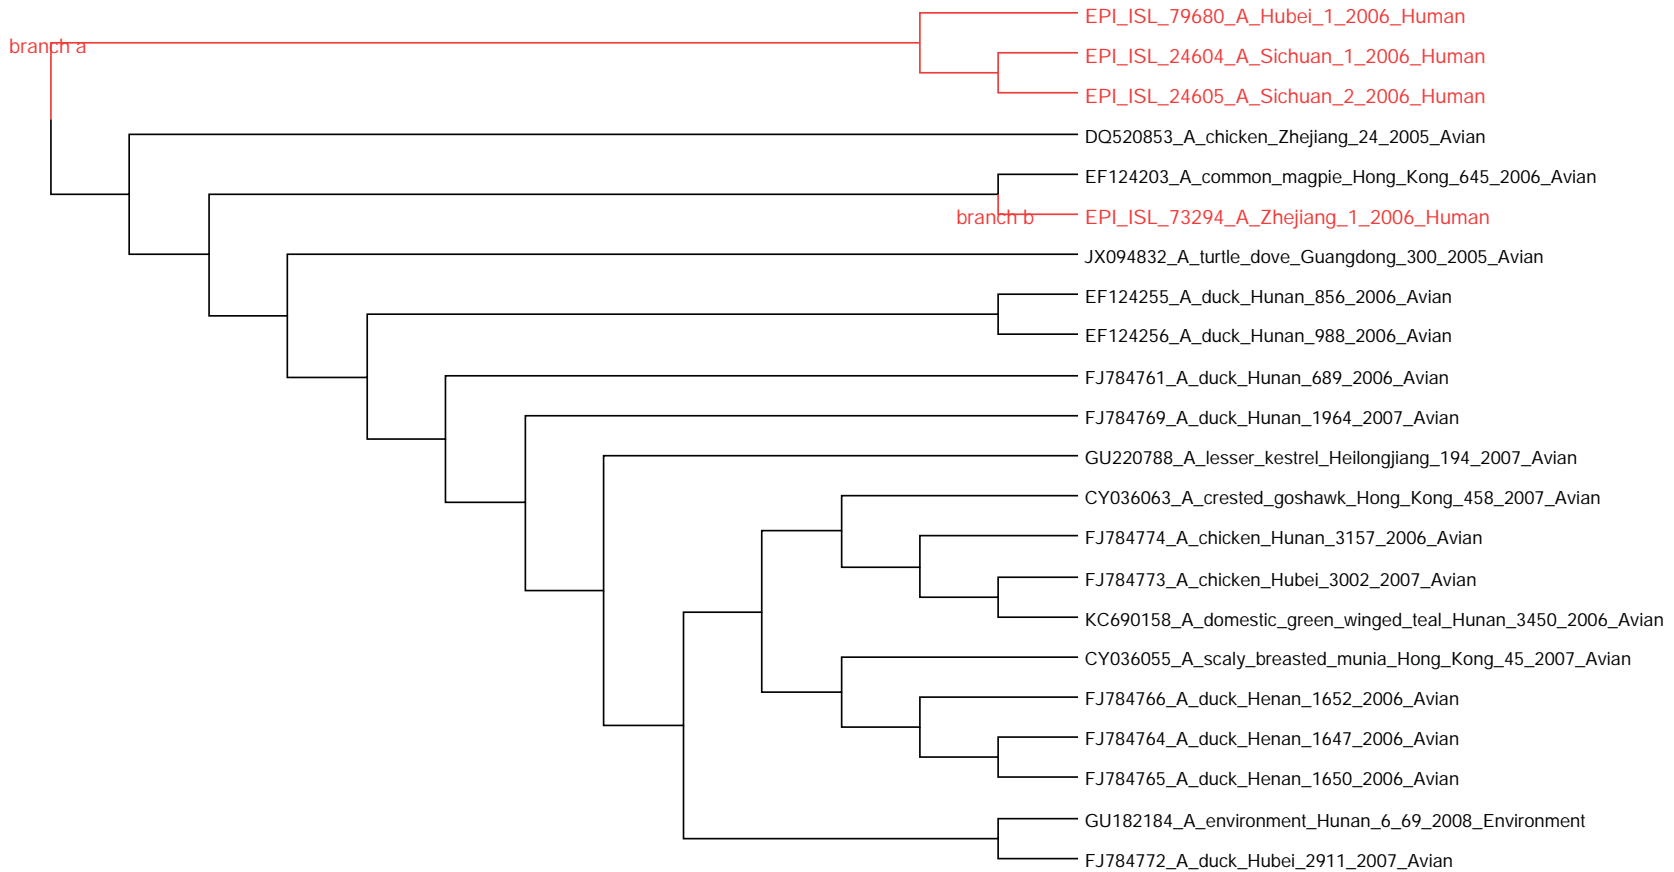

# NA1-Group51

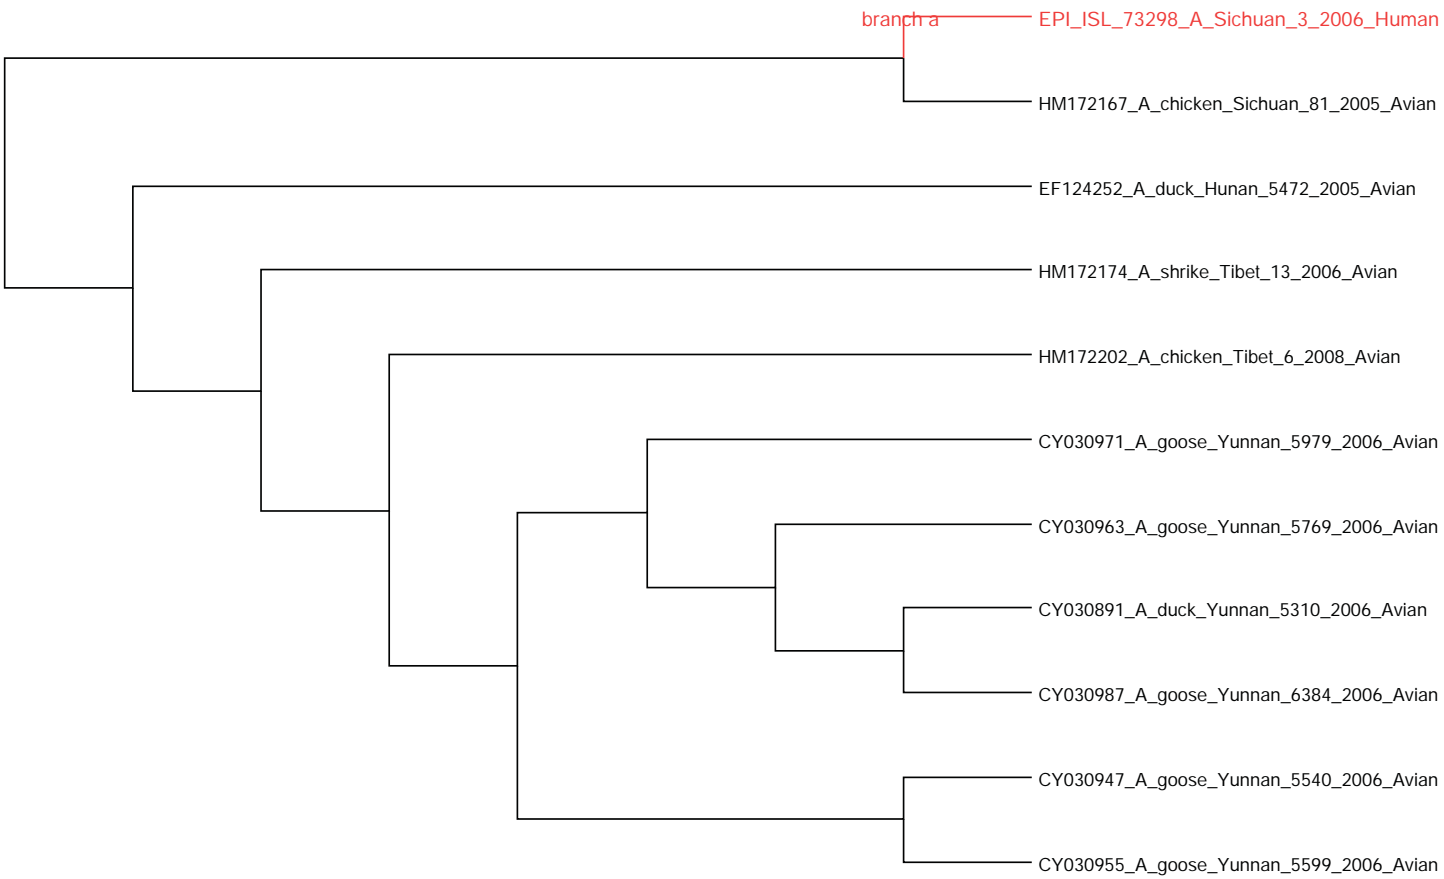

# NA1-Group52

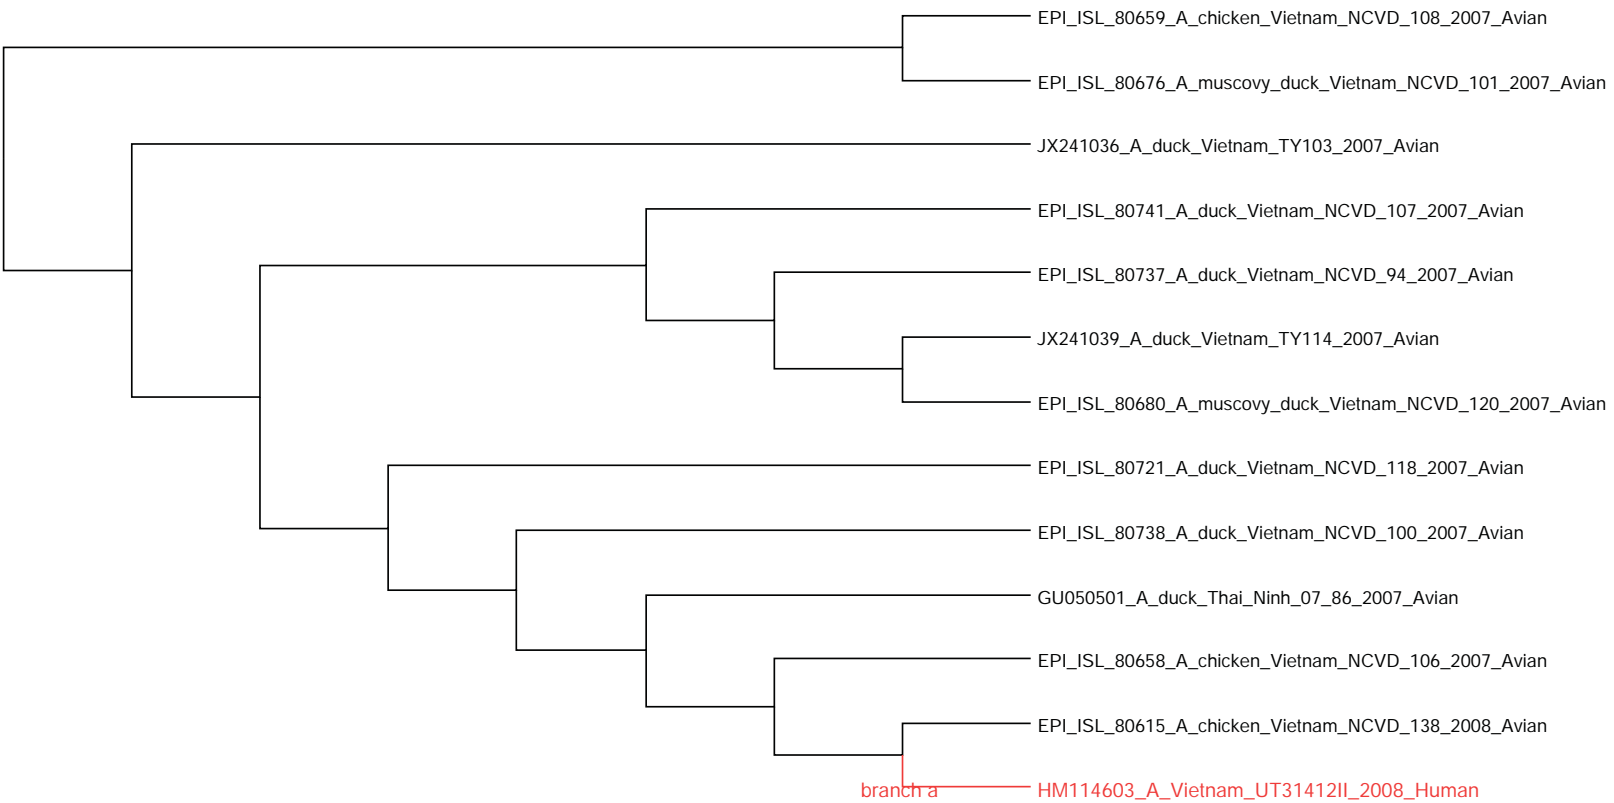

# NA1-Group53

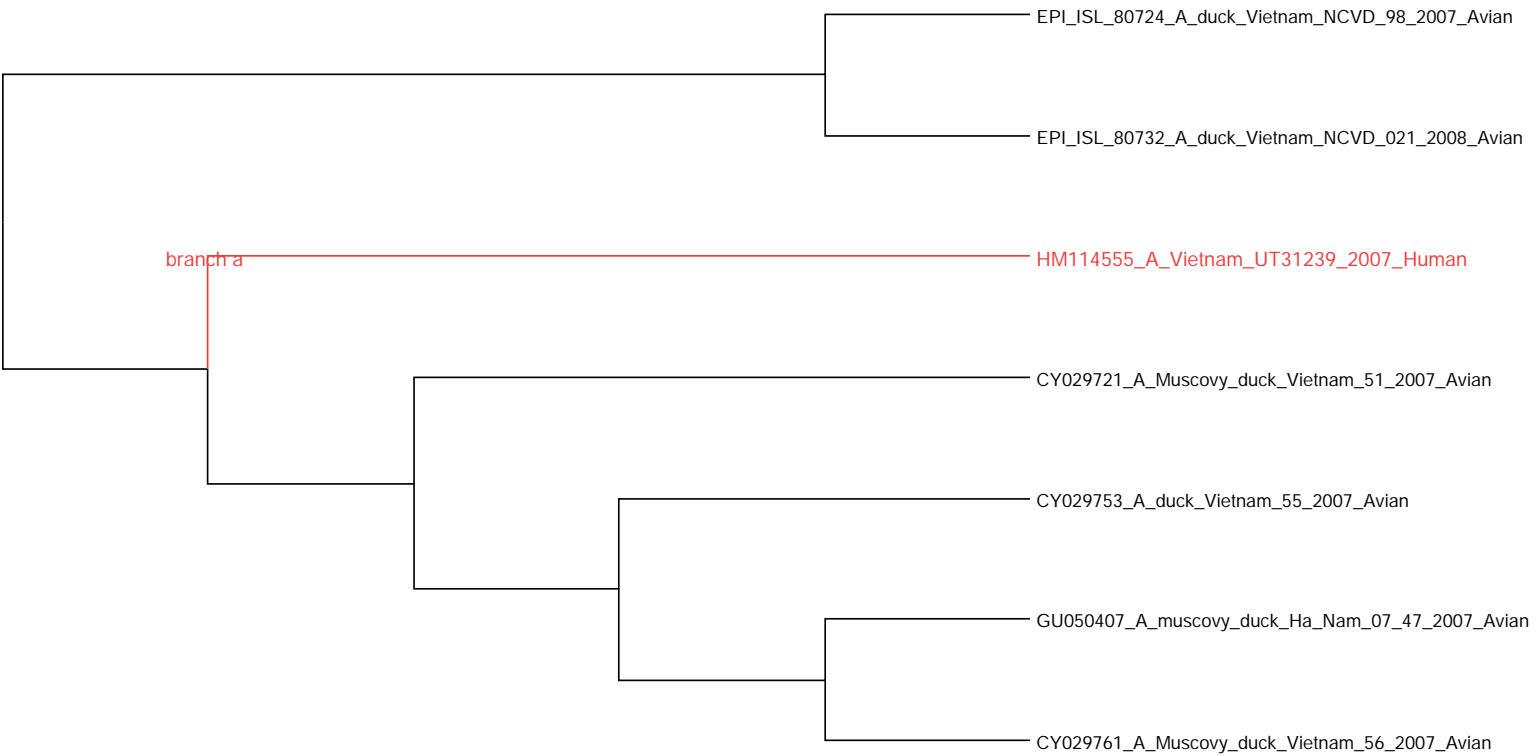

# NA1-Group54

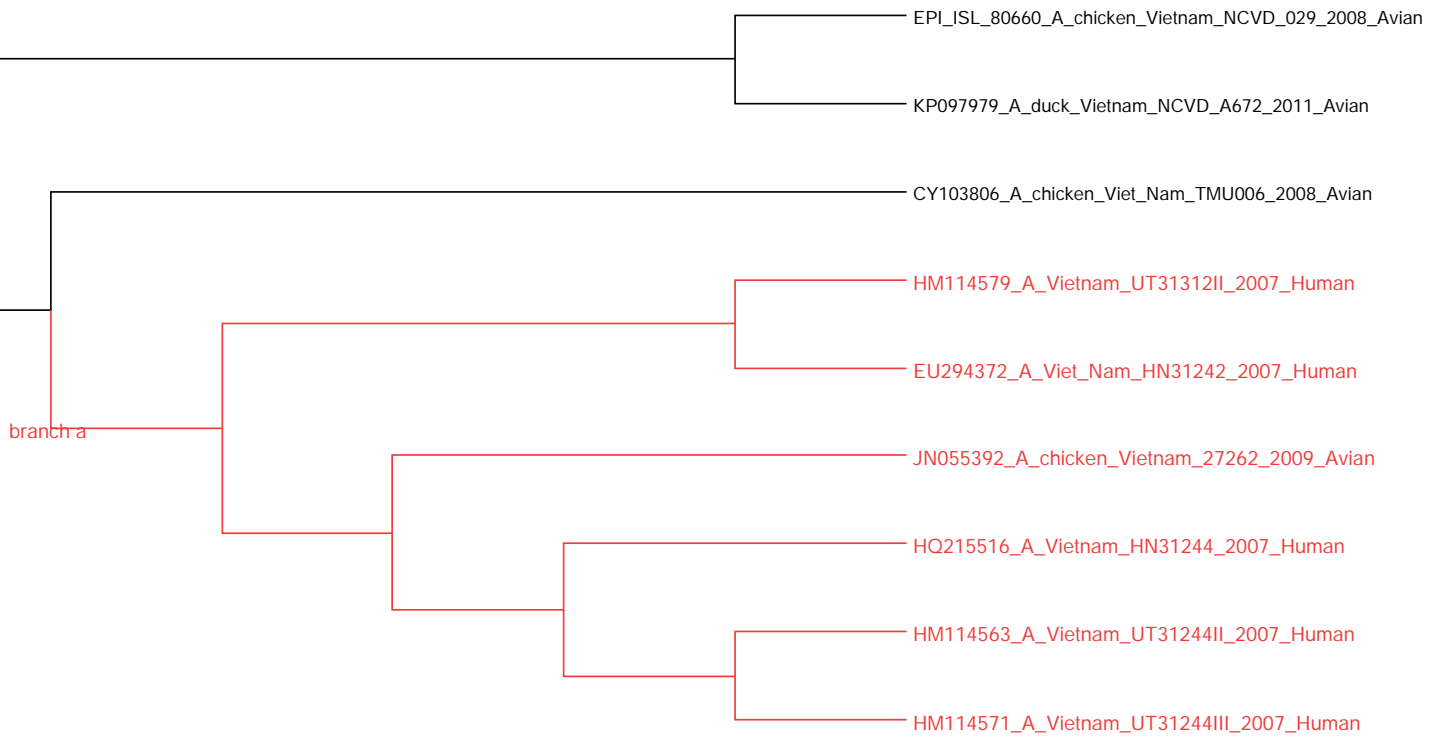

# NA1-Group55

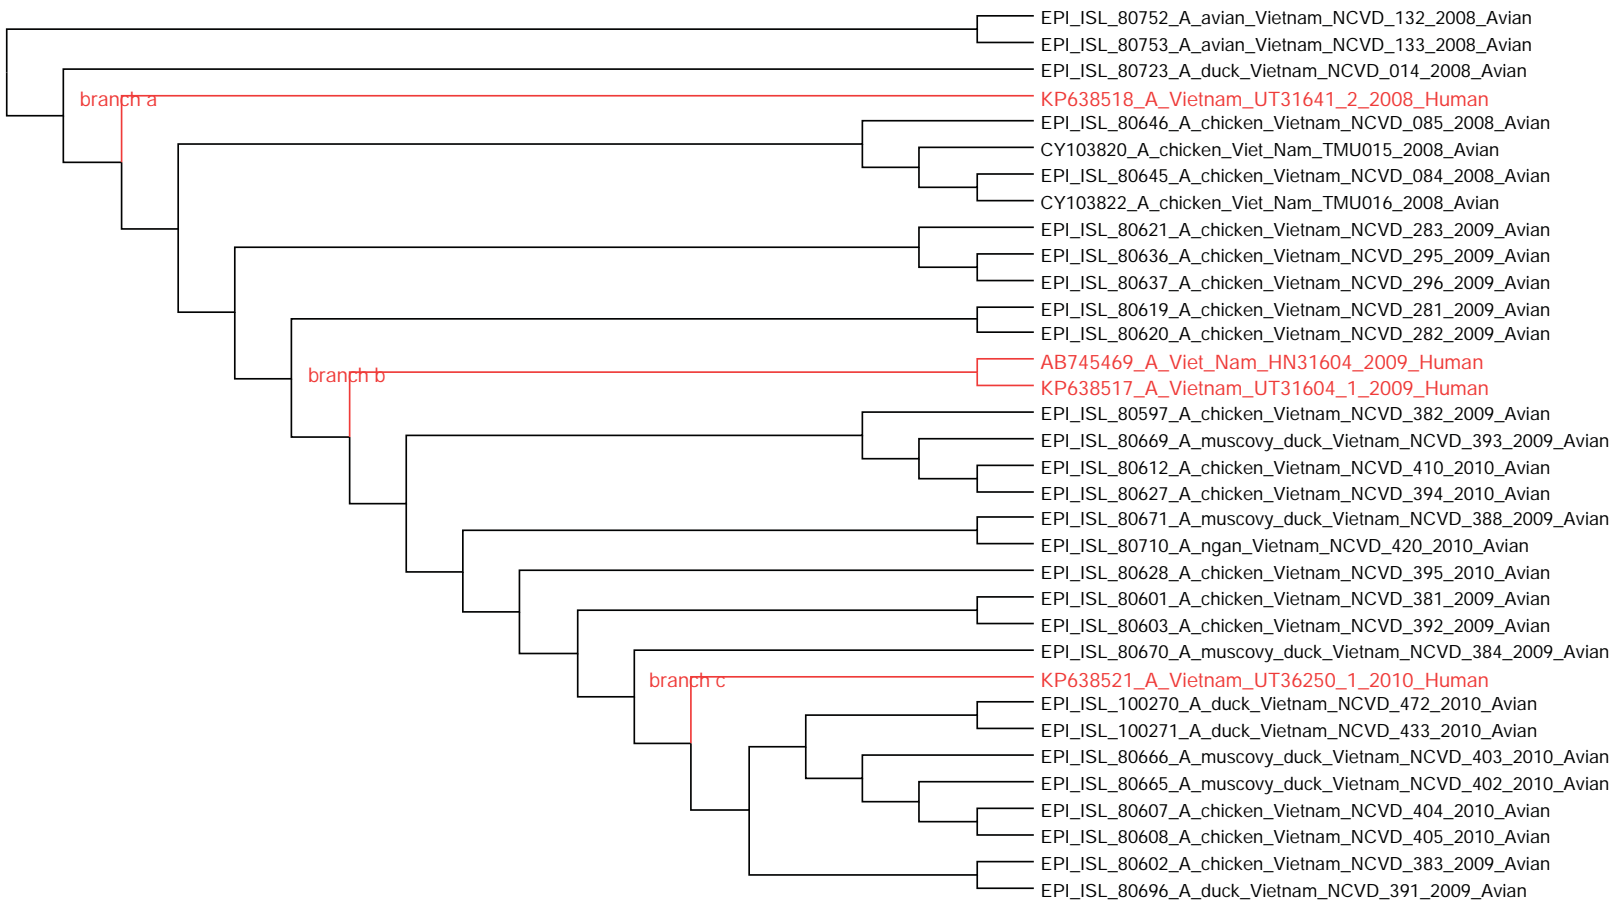

# NA1-Group56

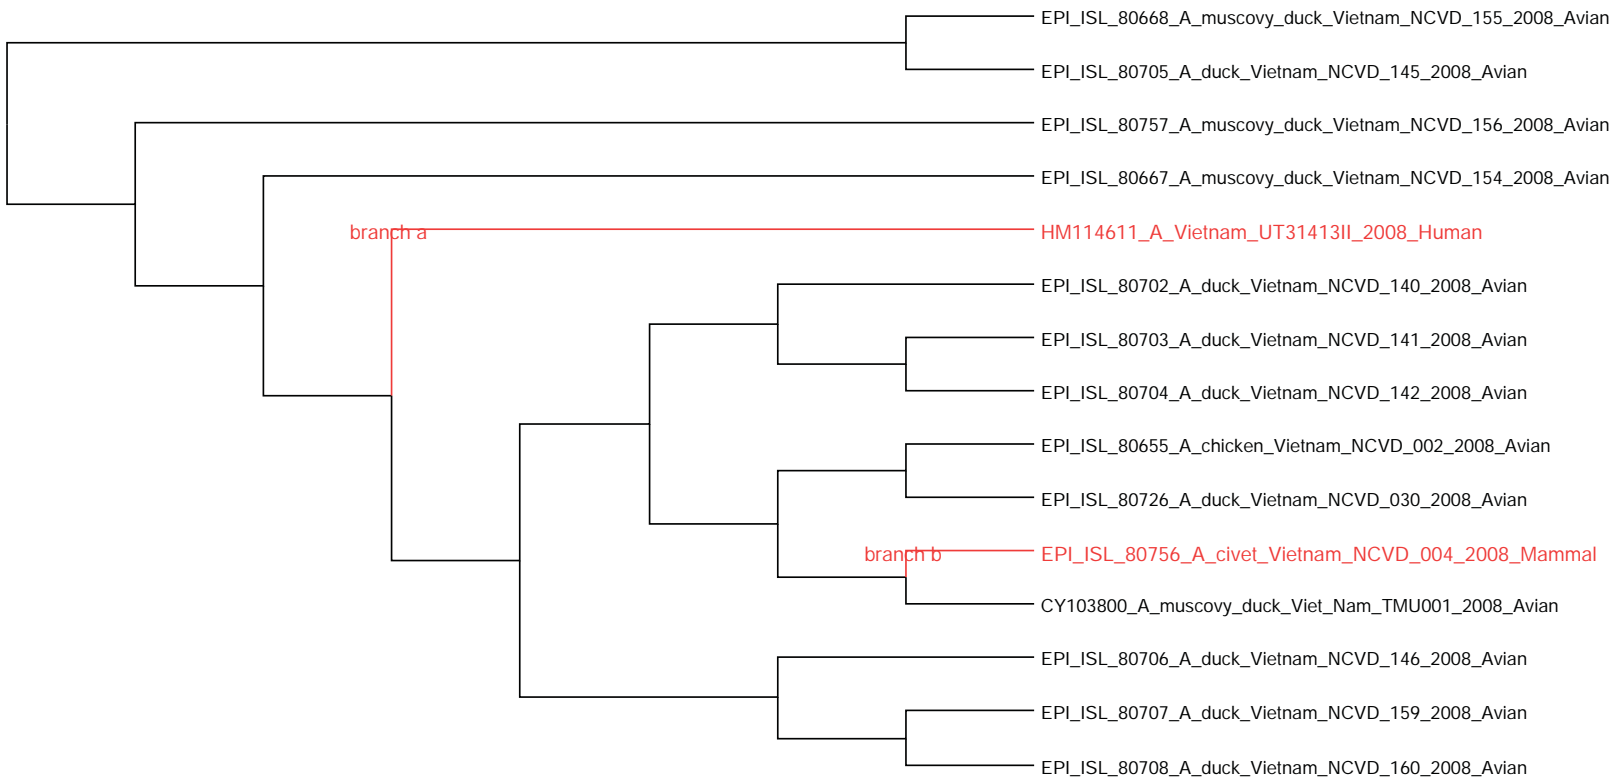



# NA1-Group57

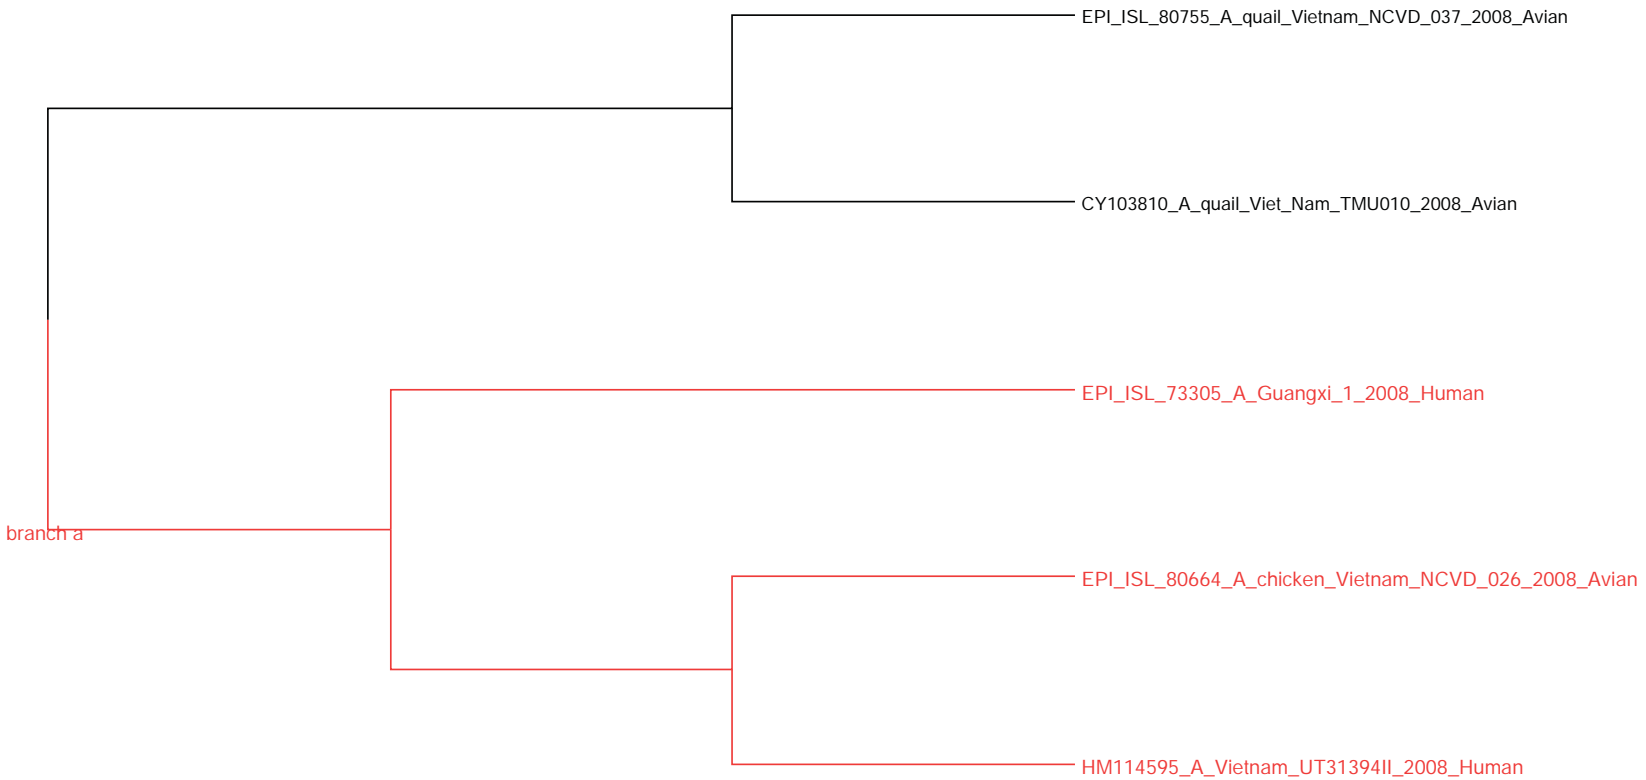

# NA1-Group58

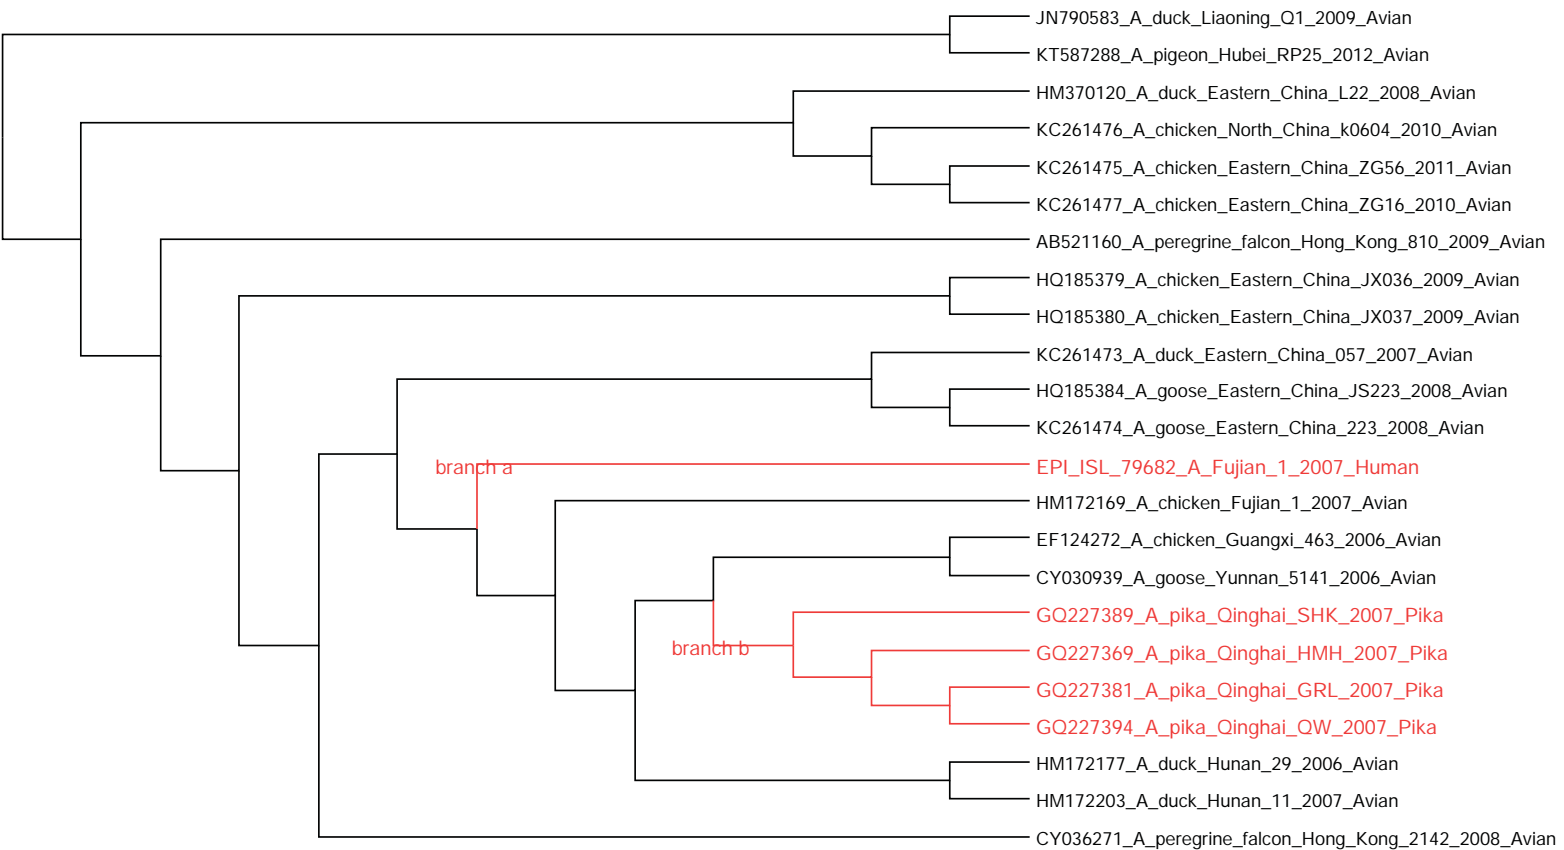

# NA1-Group59

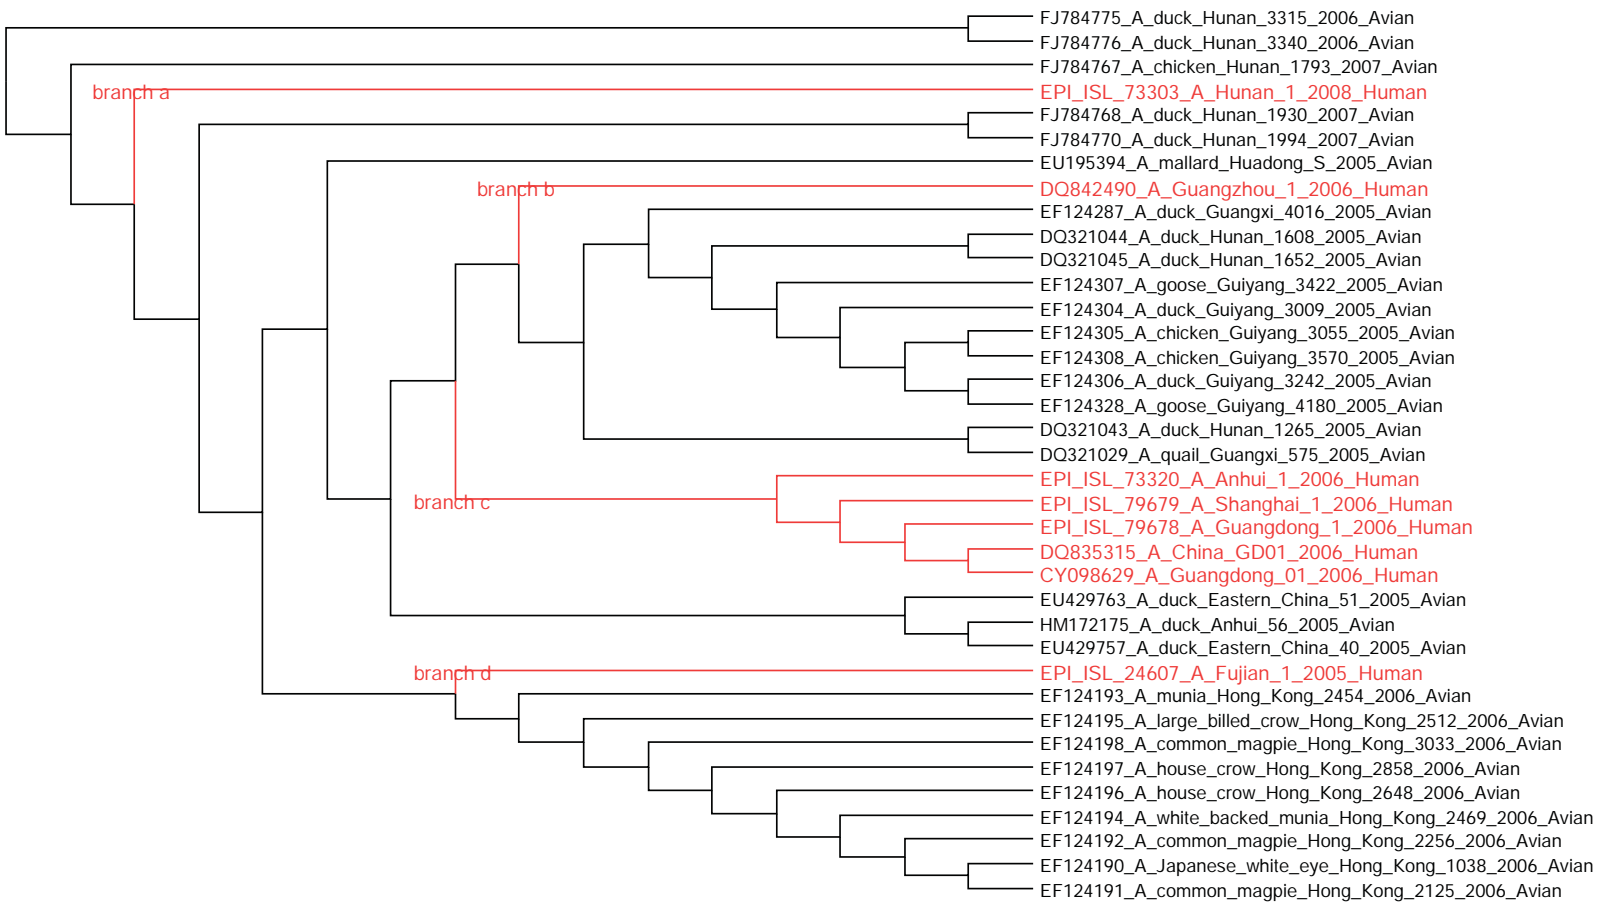

# NA1-Group60

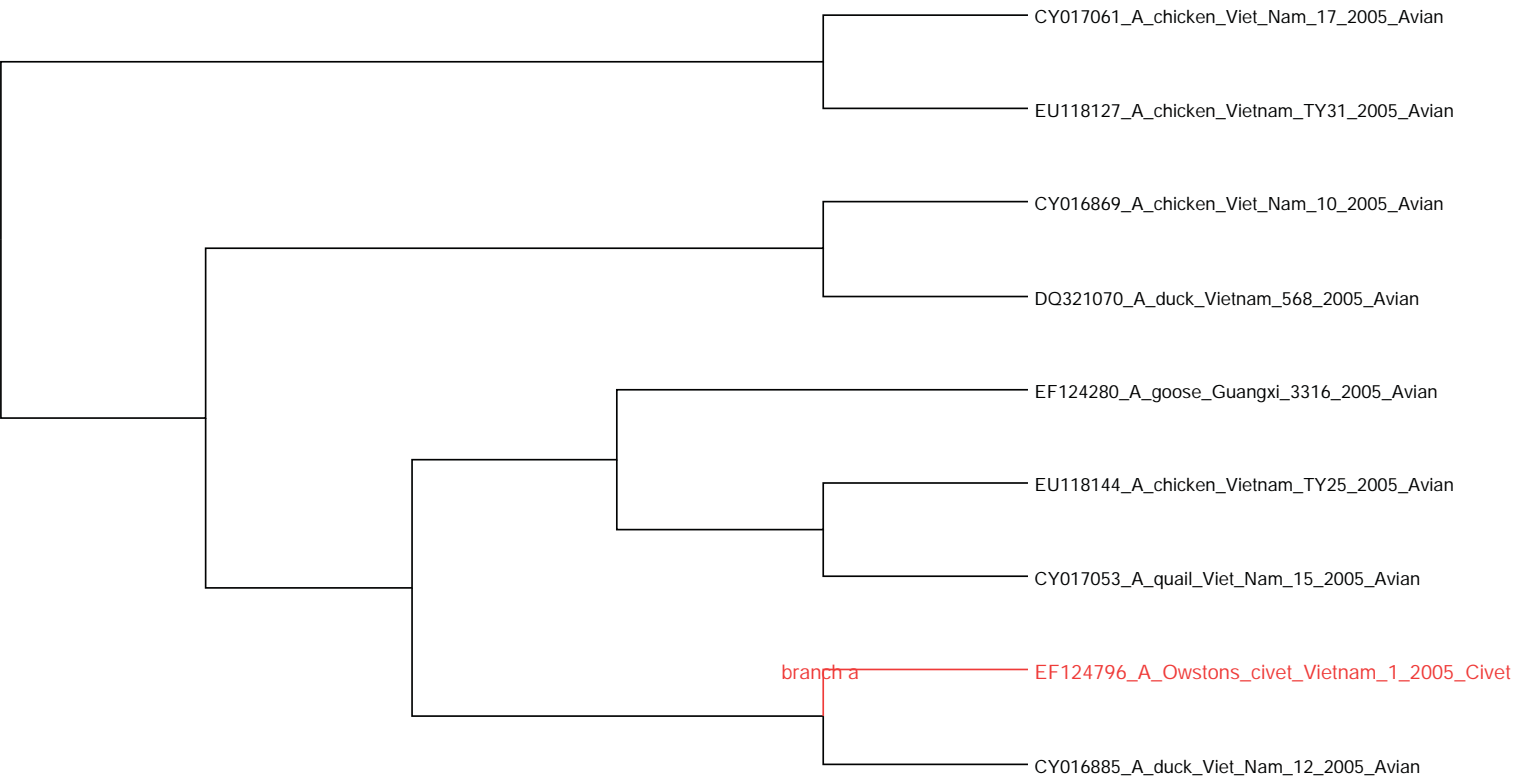

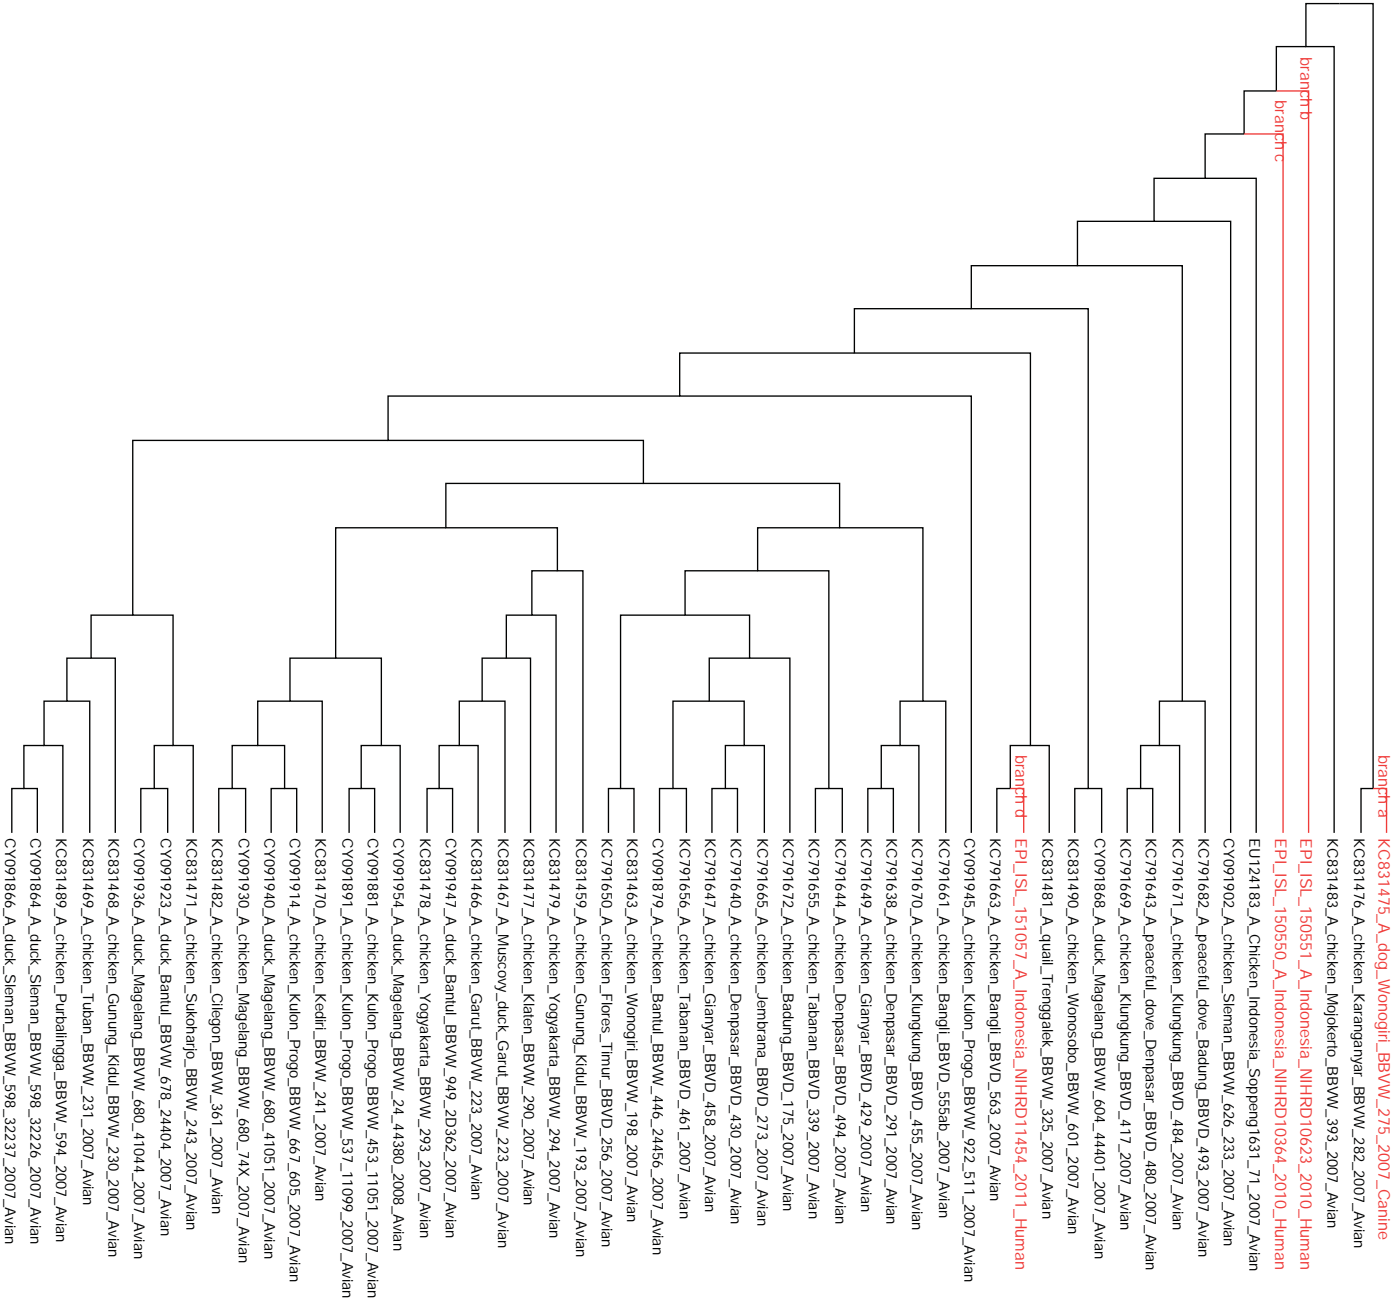

# NA1-Group61

NA1-Group61

# NA1-Group62

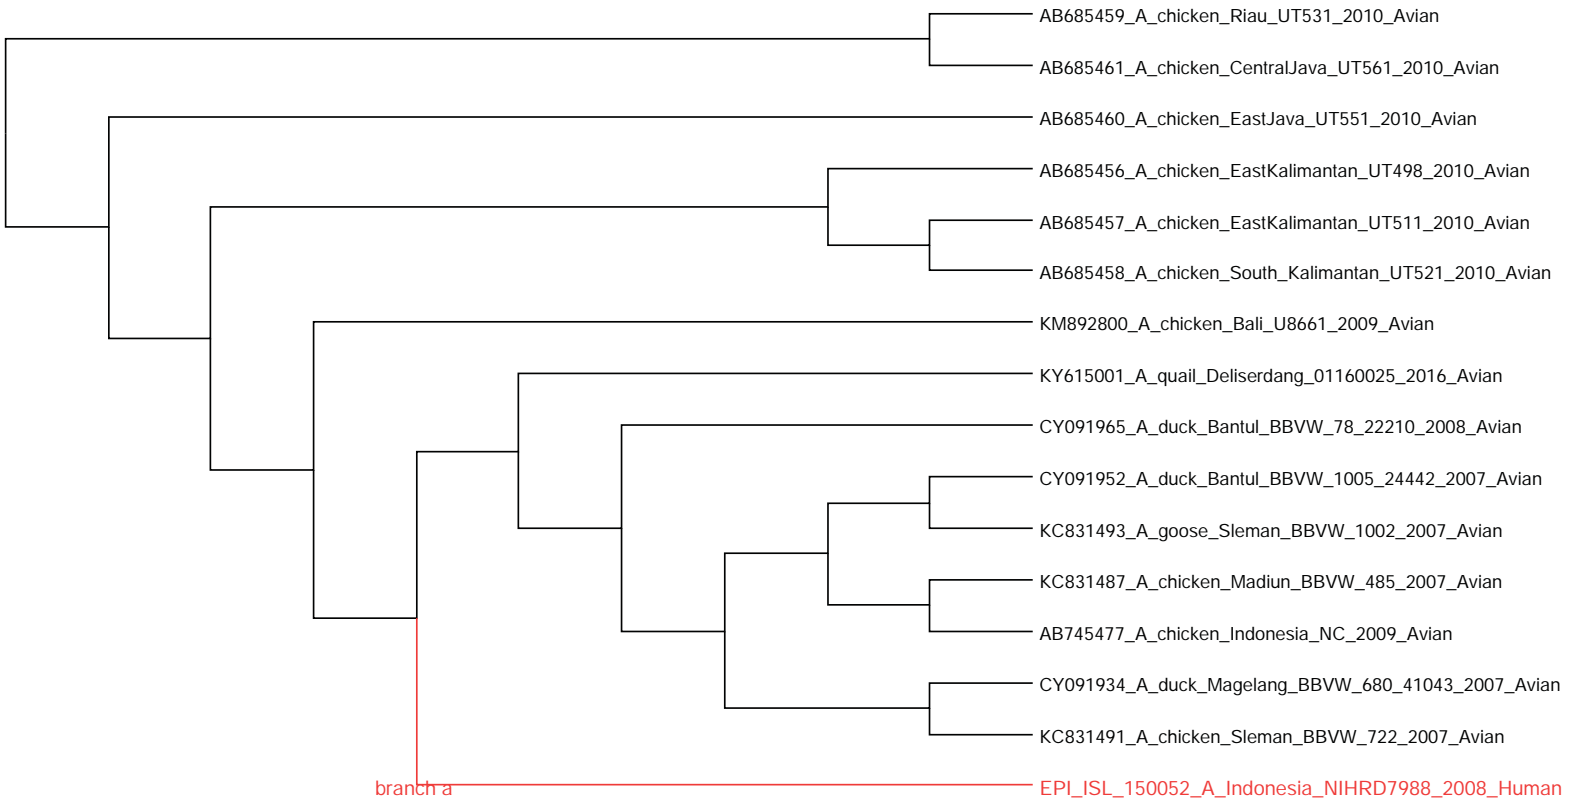

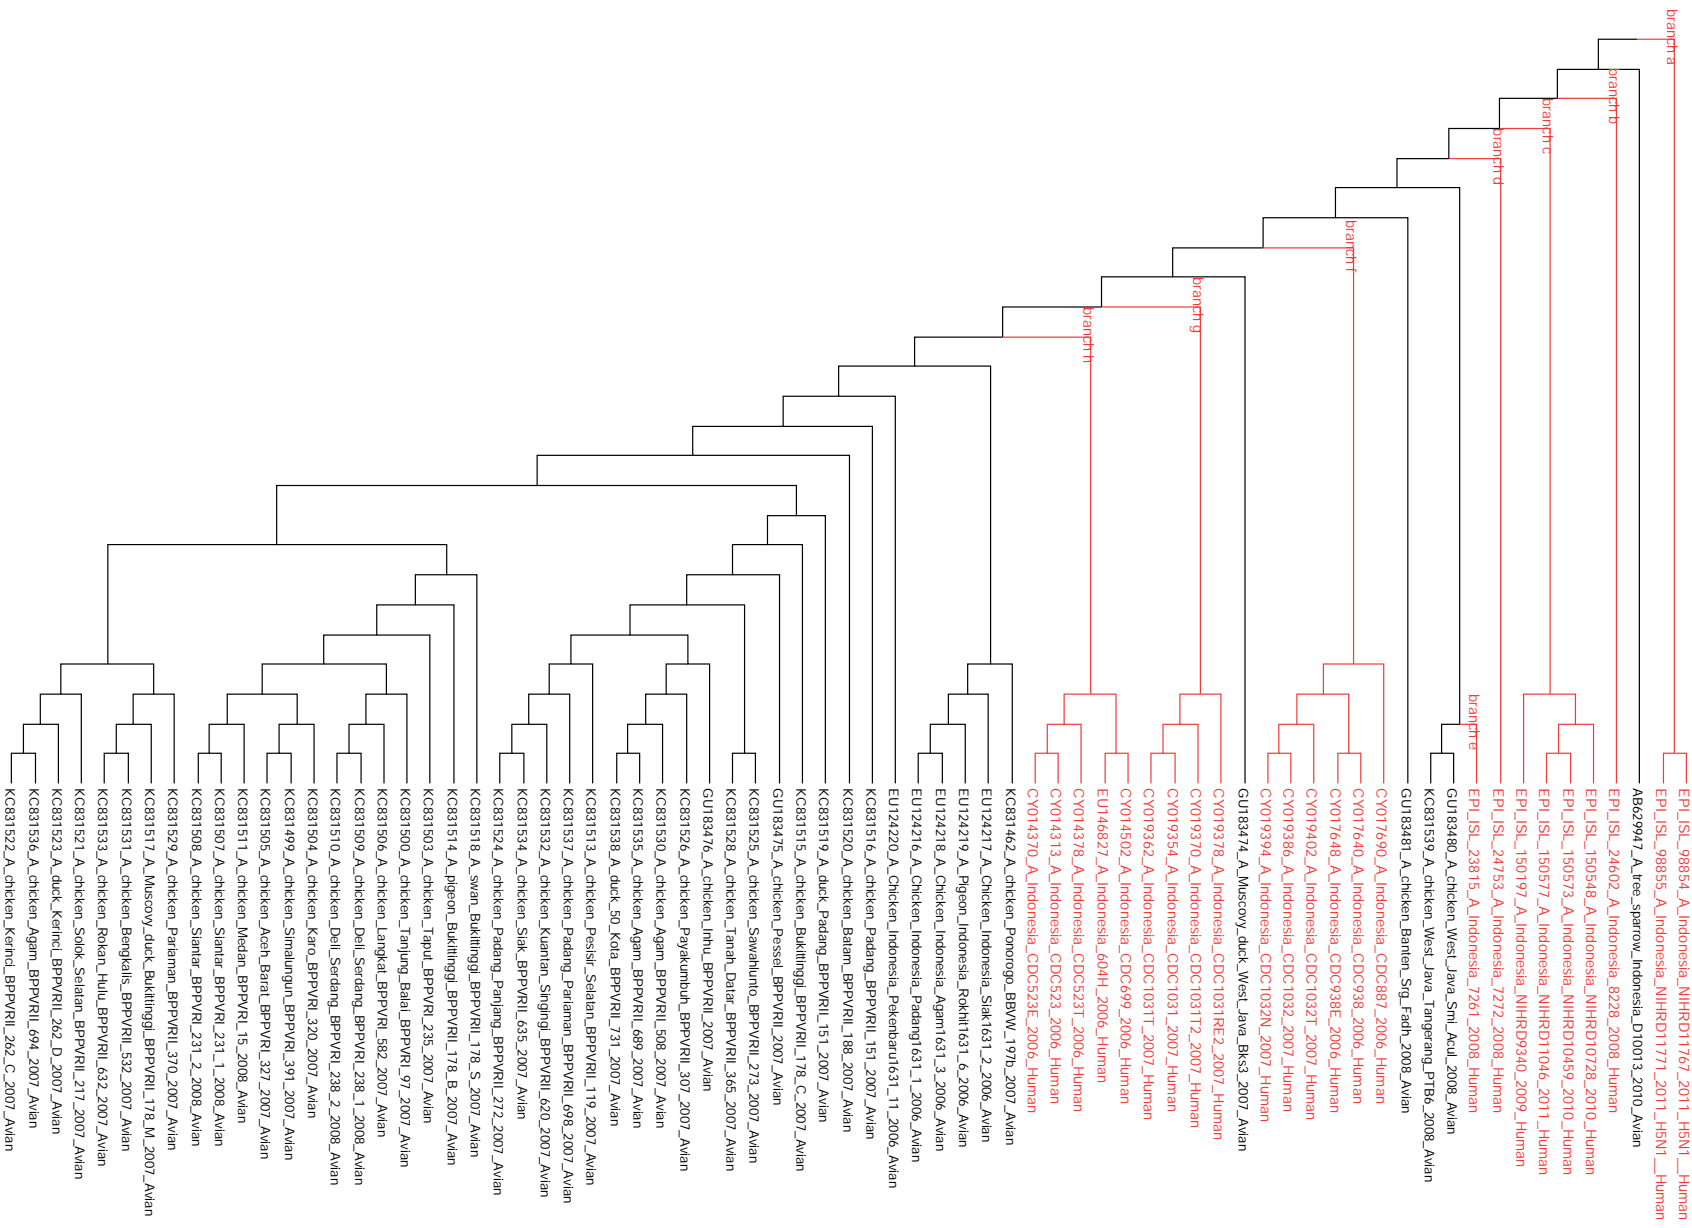

NA1-Group63

NA1-Group63

# NA1-Group64

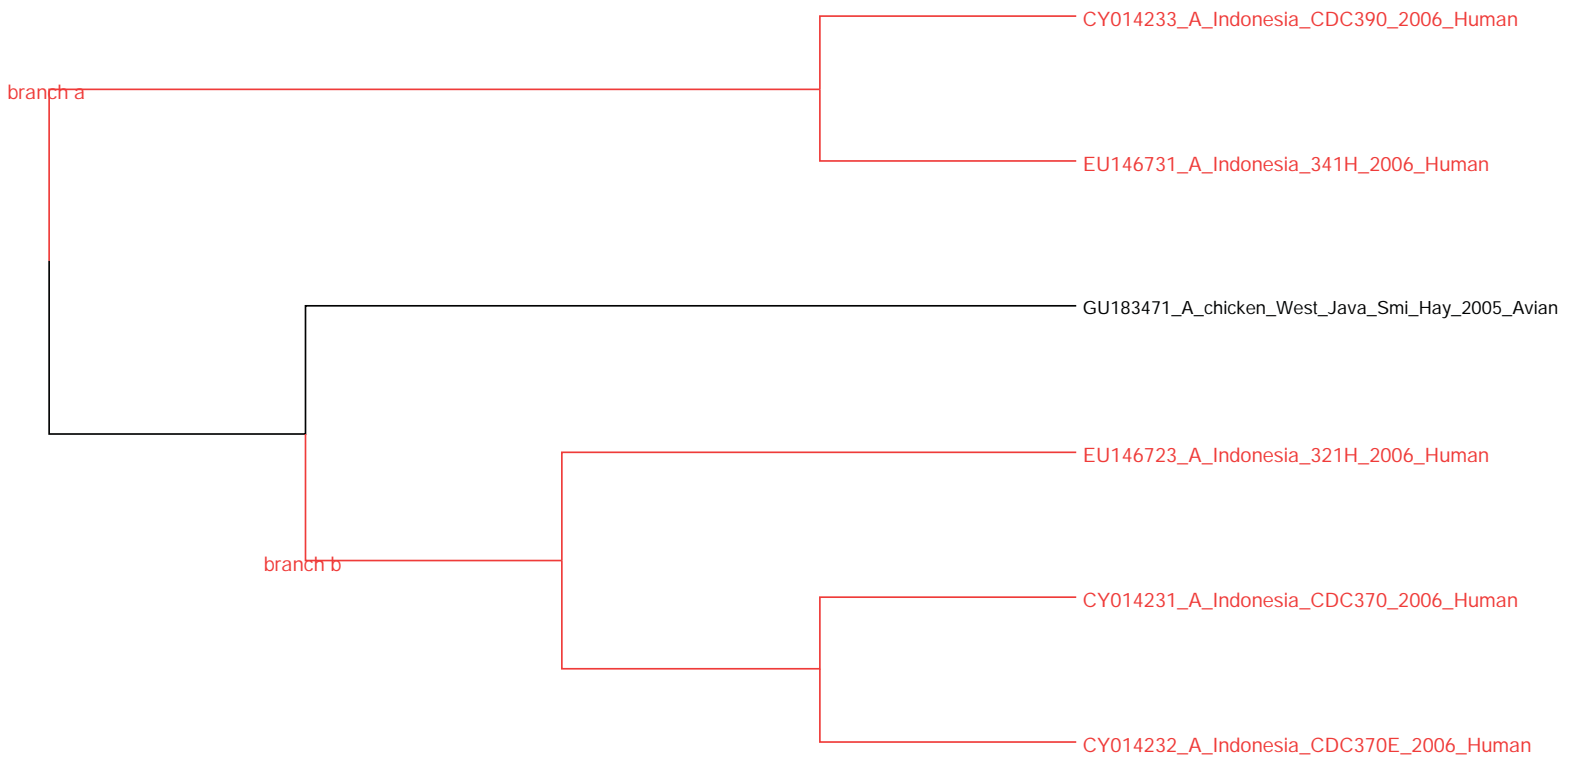



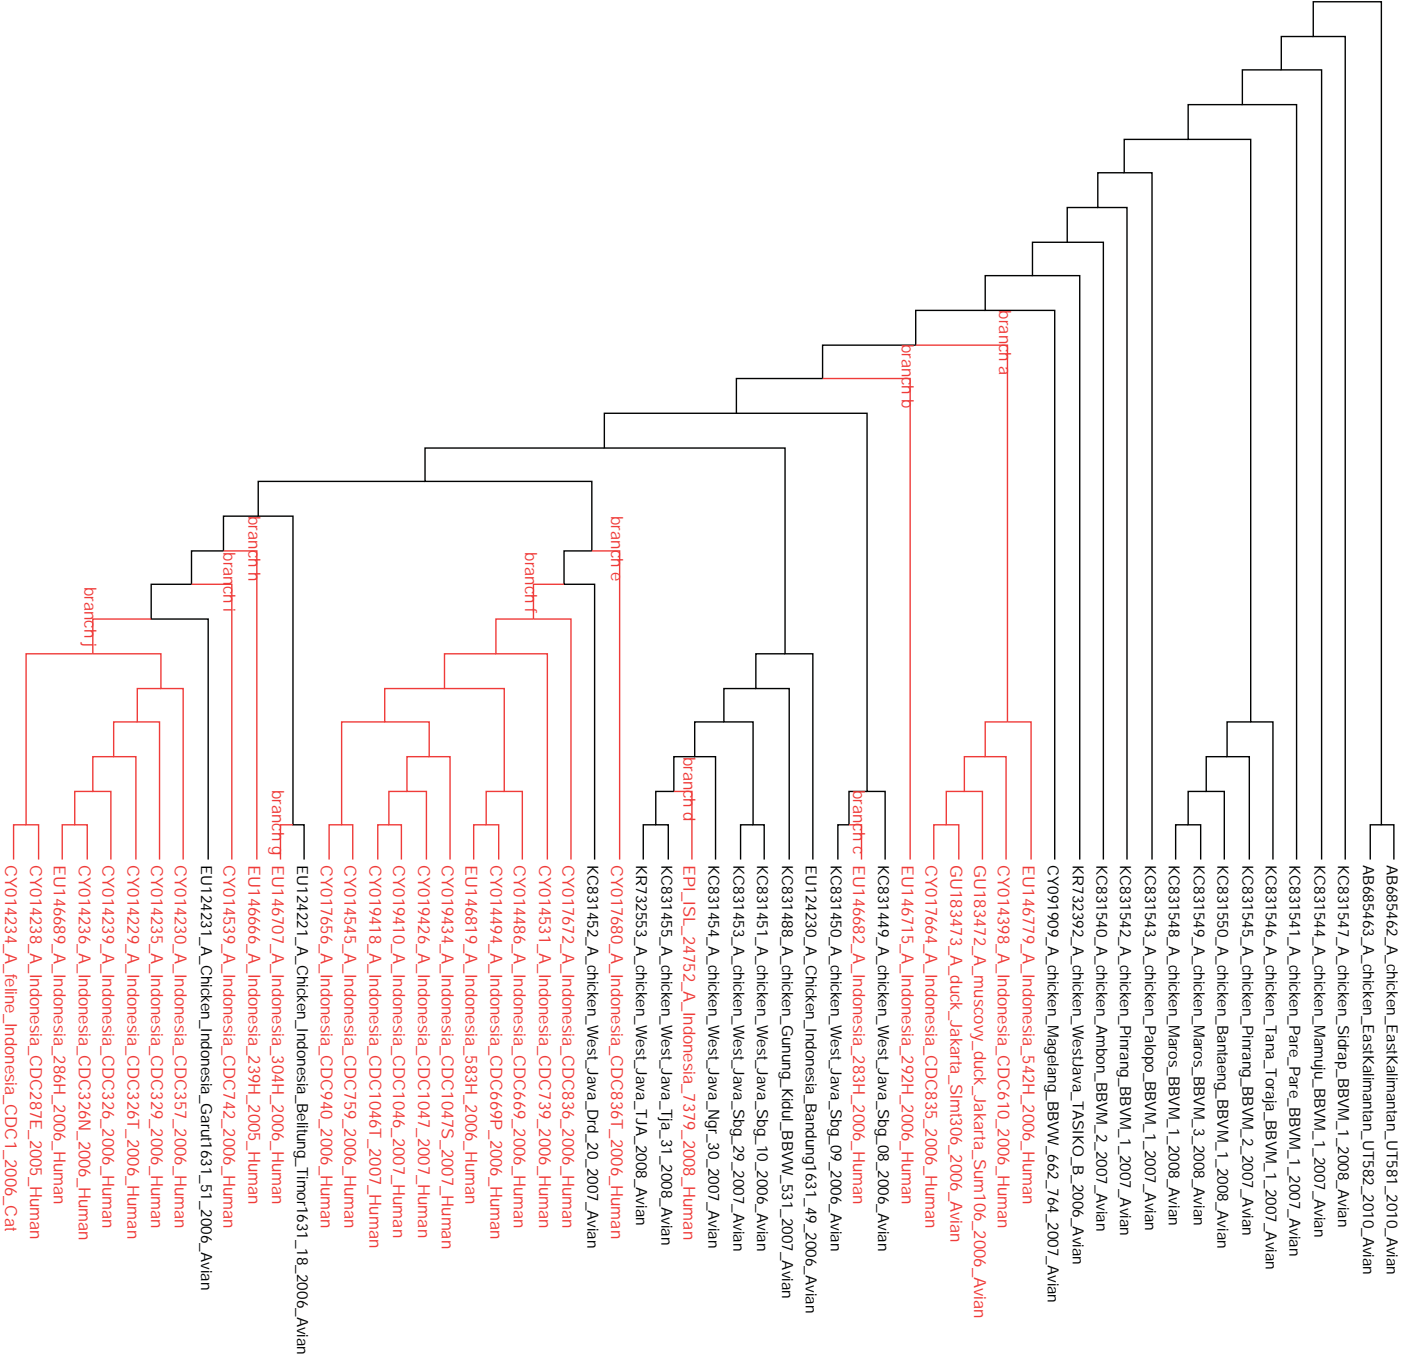

NA1-Group65

# NA1-Group65

# NA1-Group66

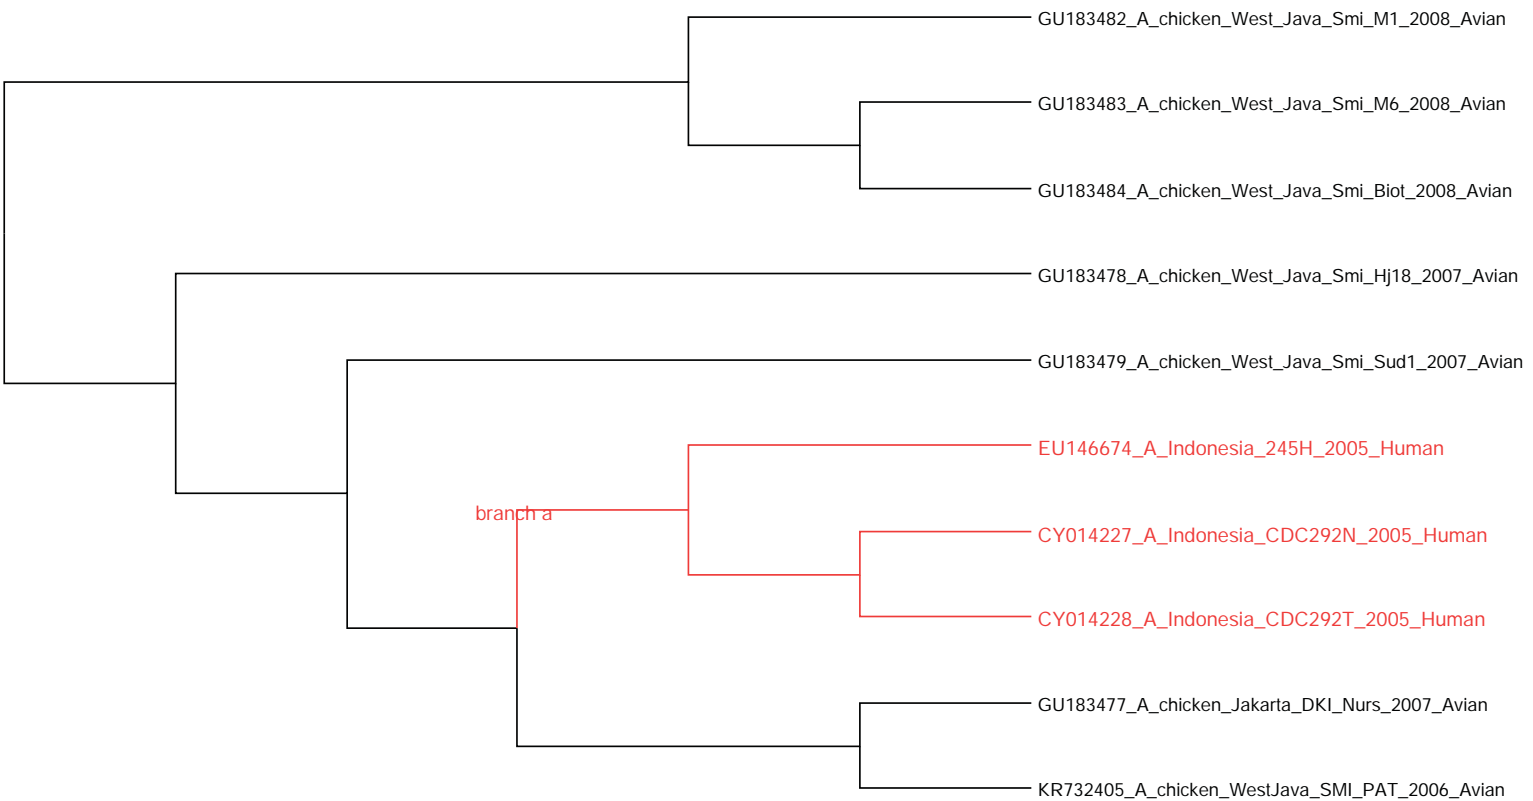

# NA1-Group67

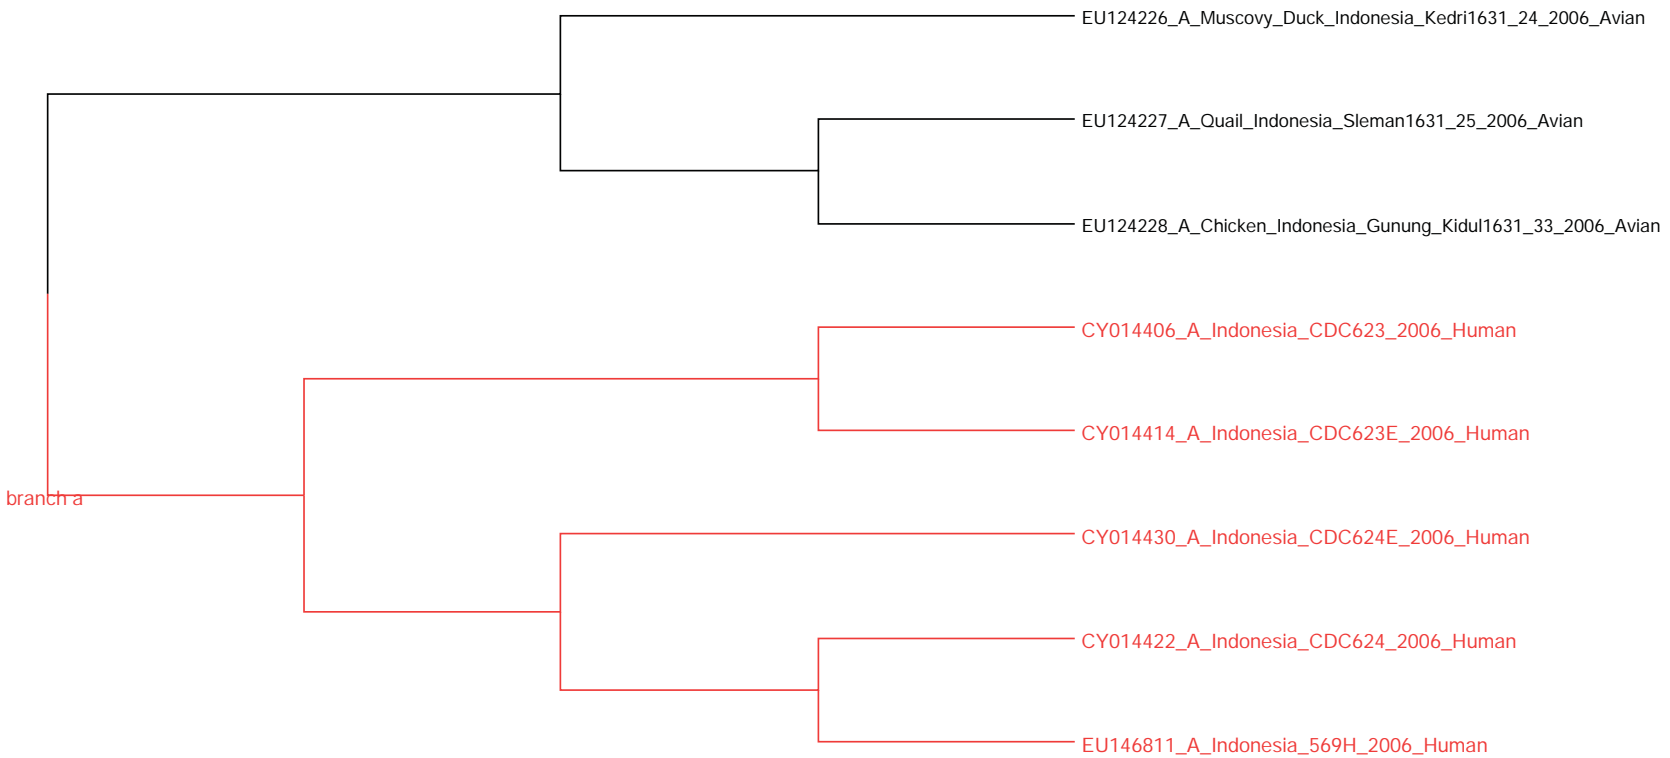

# NA1-Group68

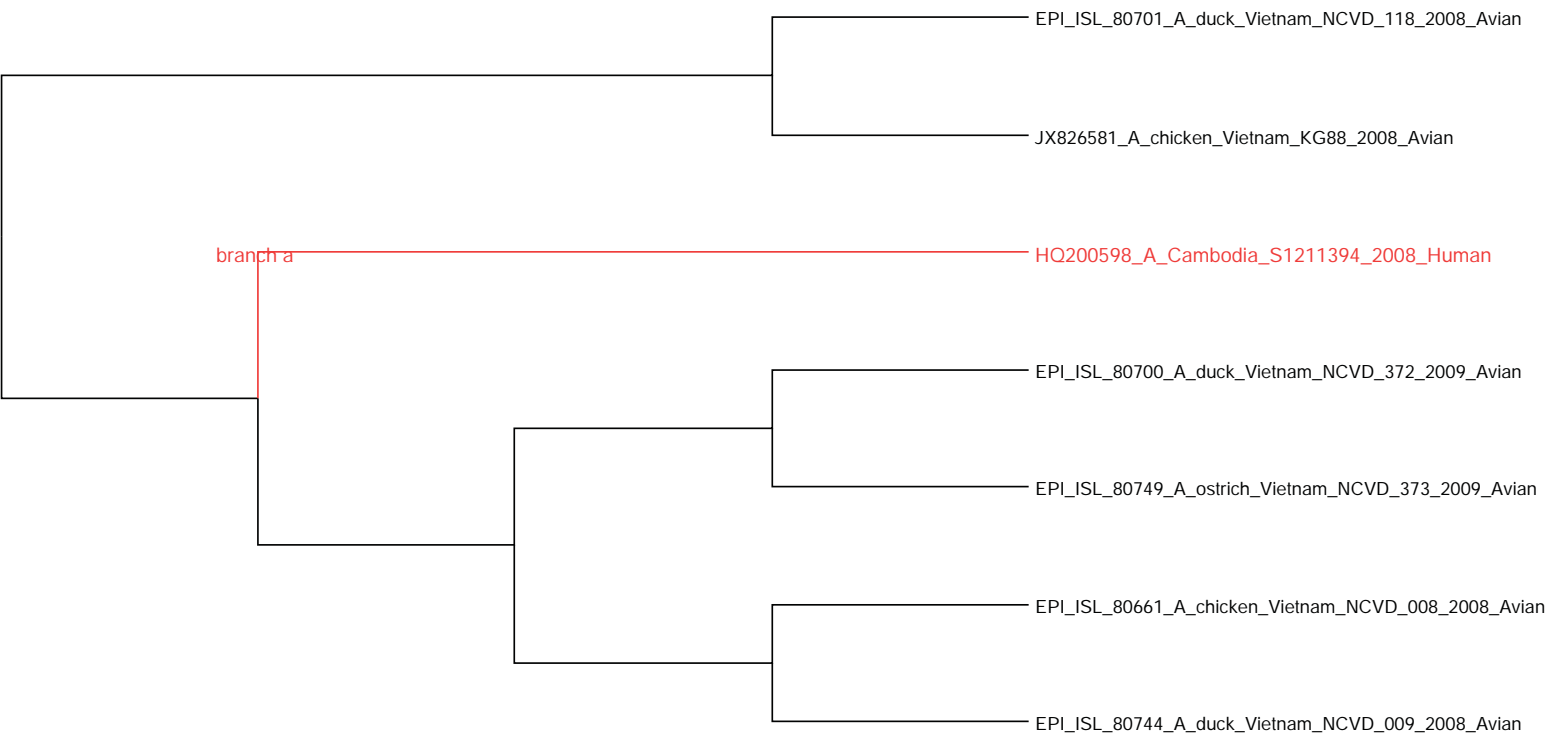

# NA1-Group69

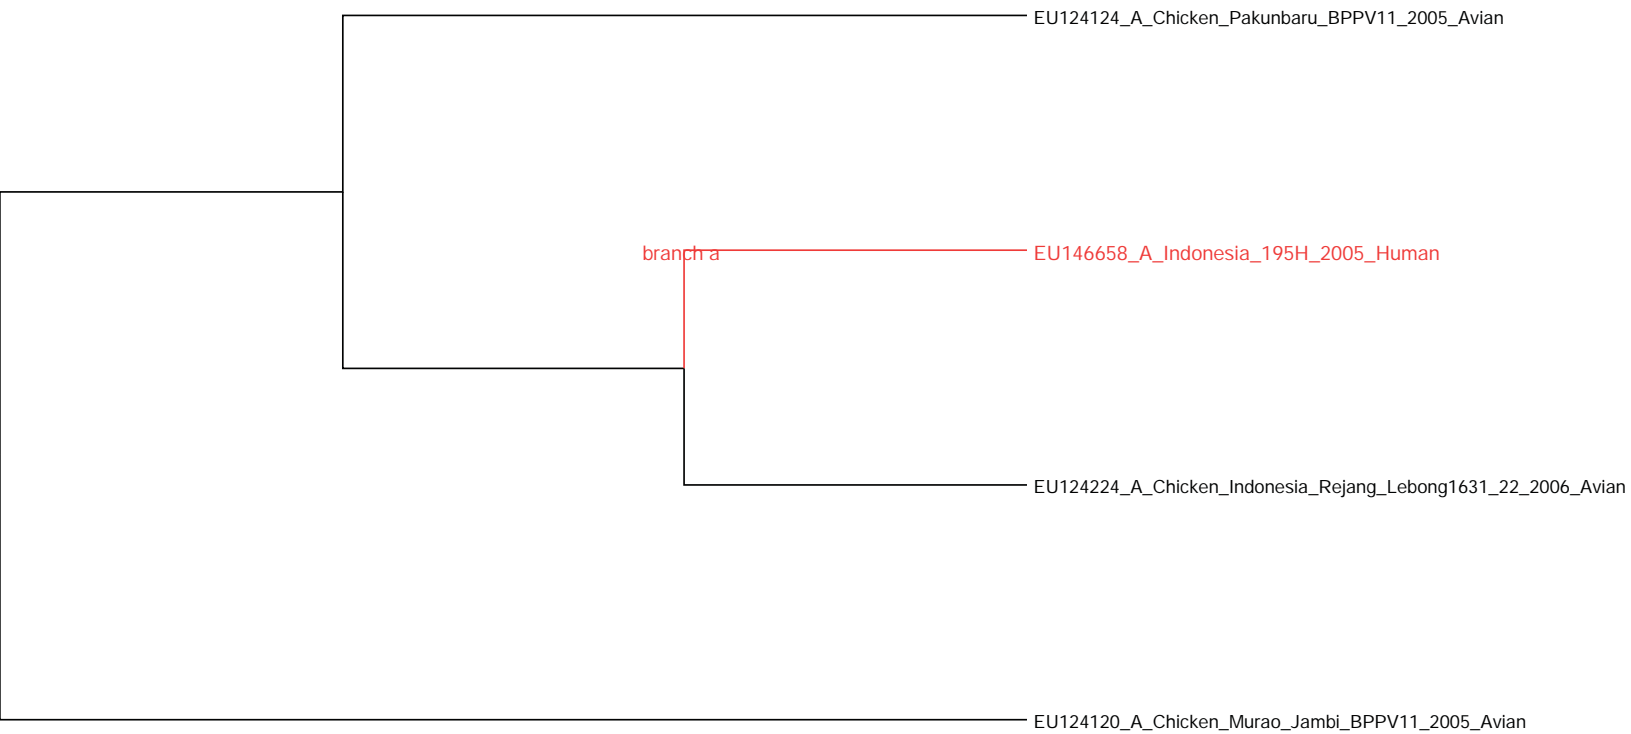

# NA1-Group70

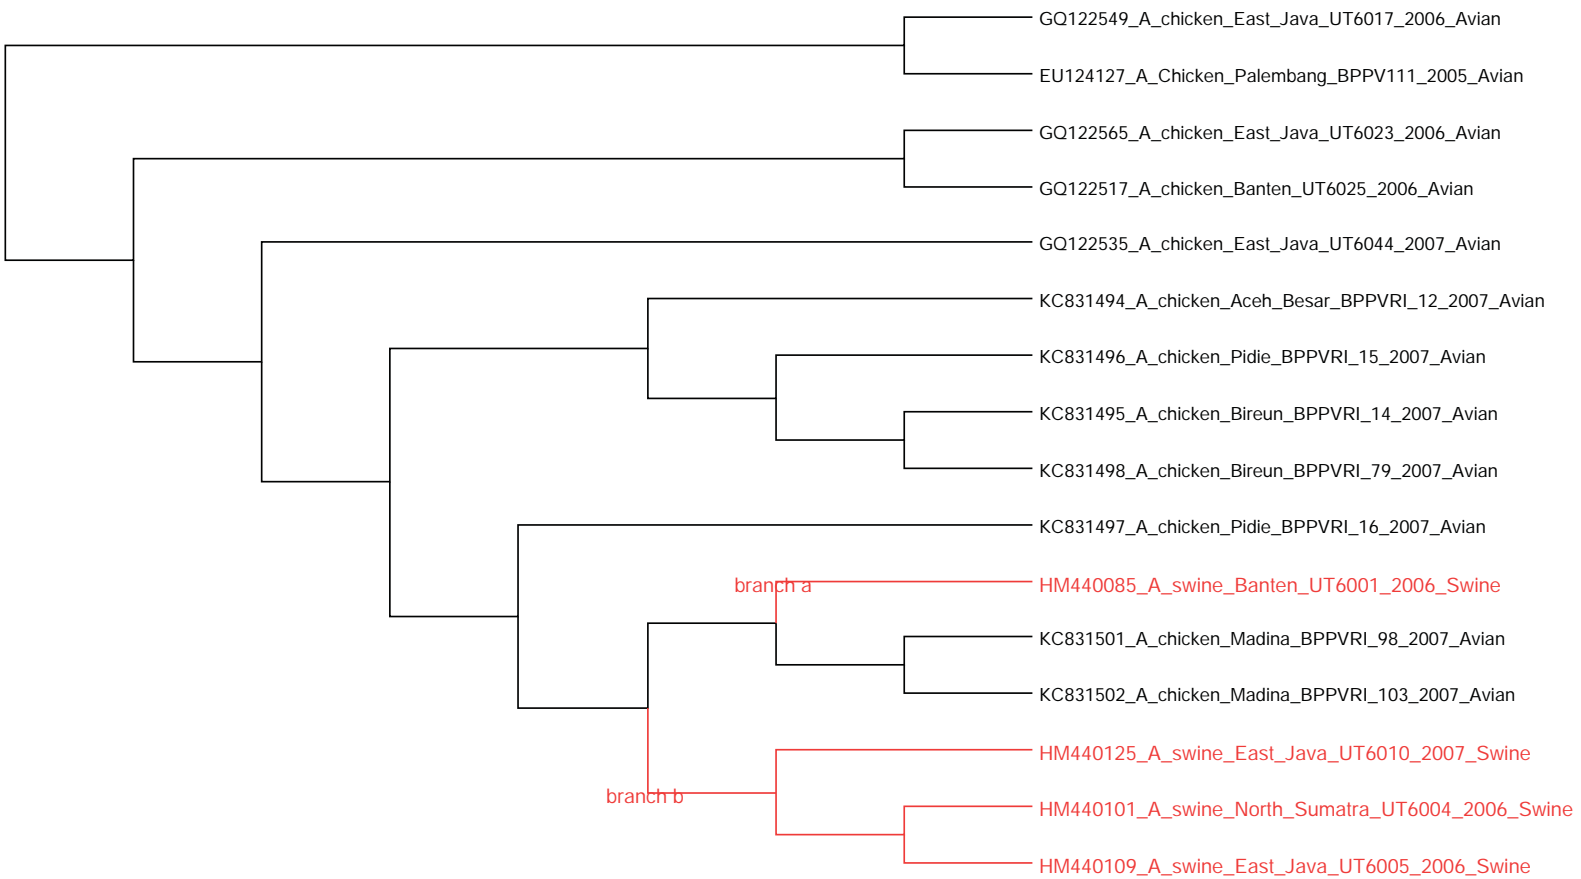

# NA1-Group71

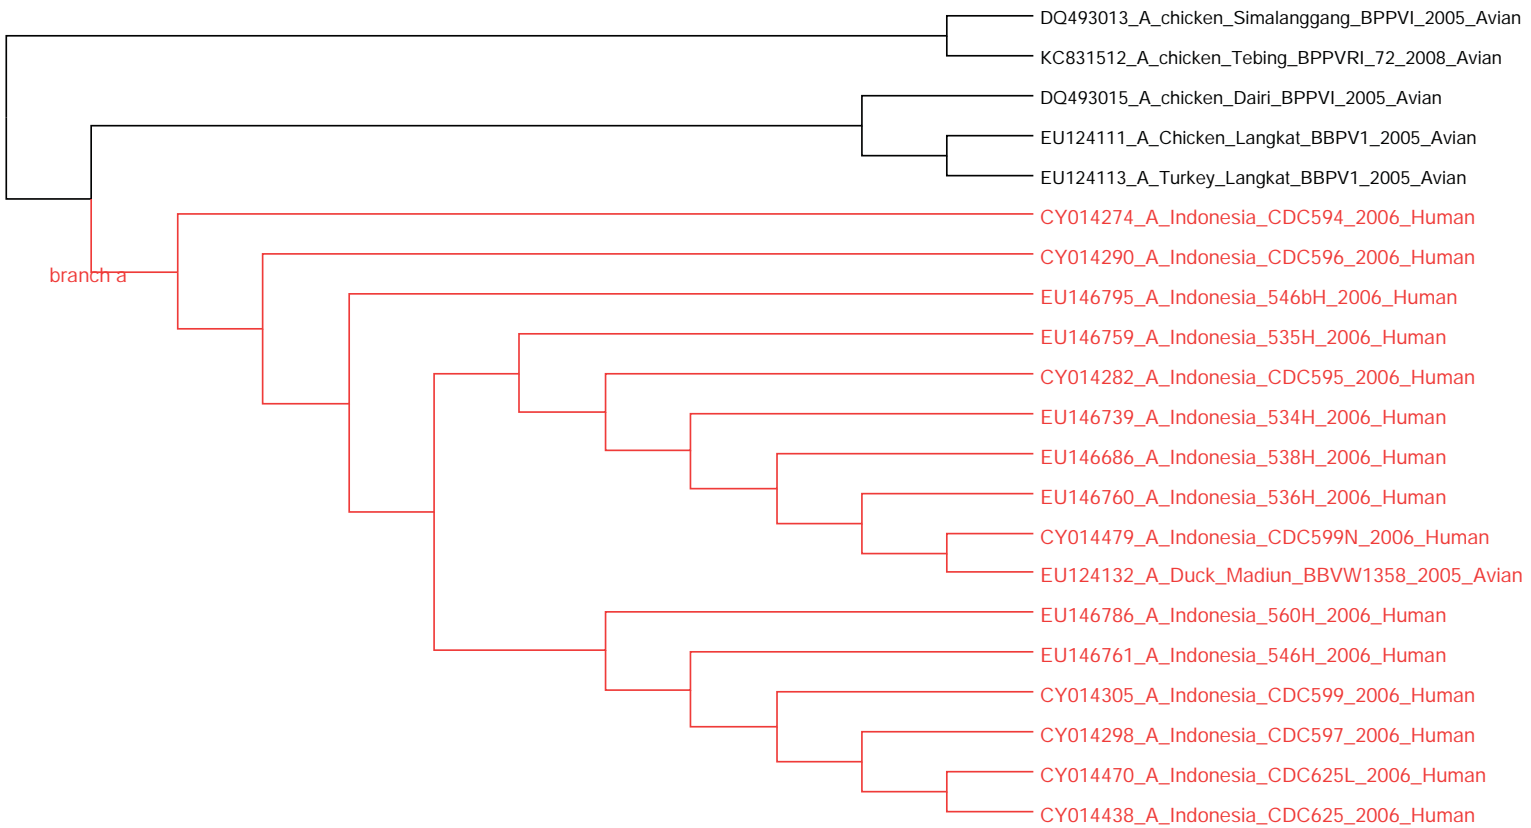

# NA1-Group72

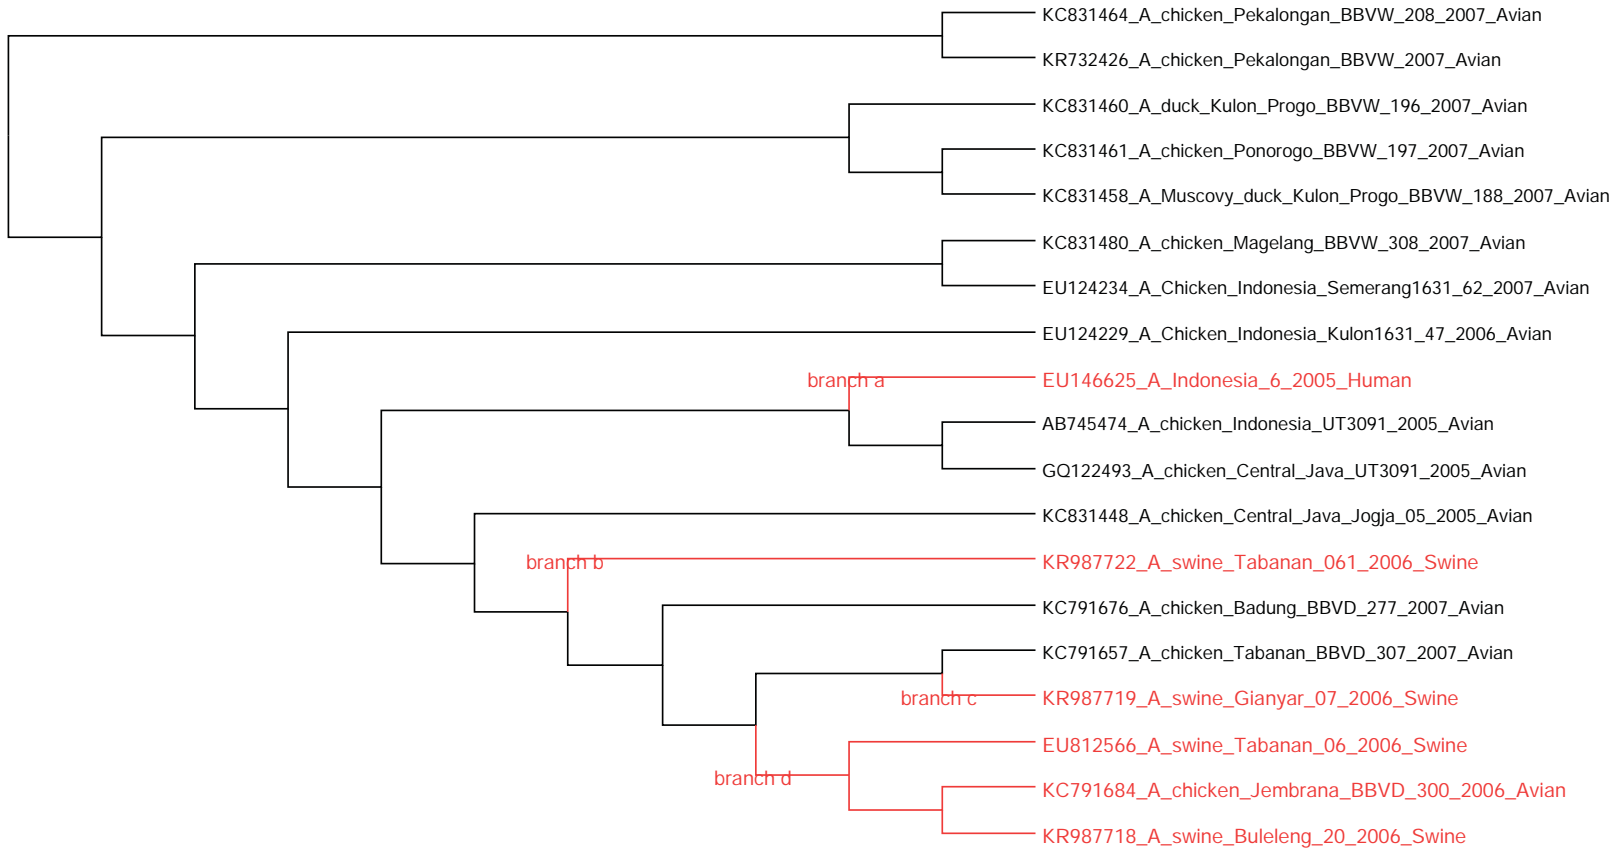



# NA1-Group73

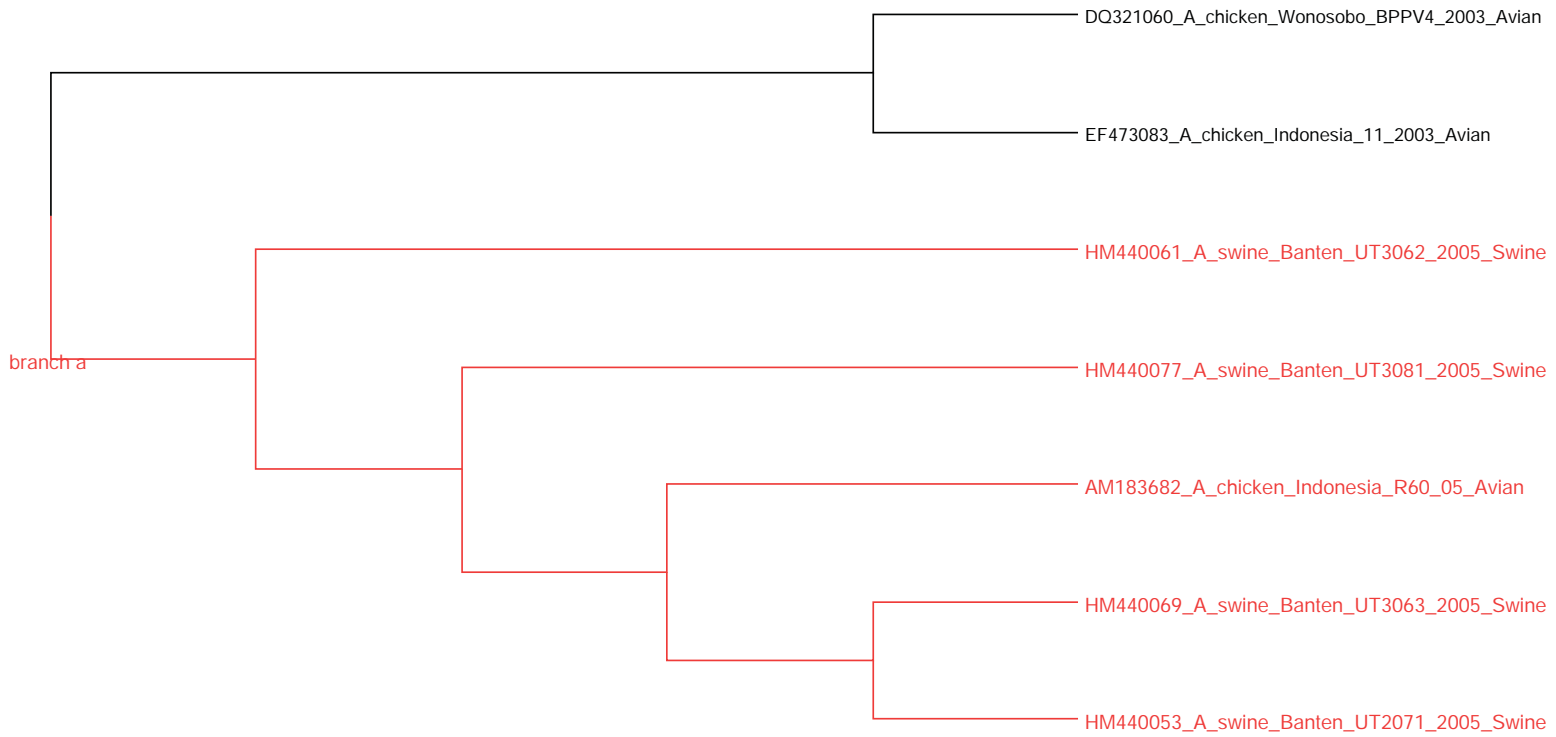

# NA1-Group74

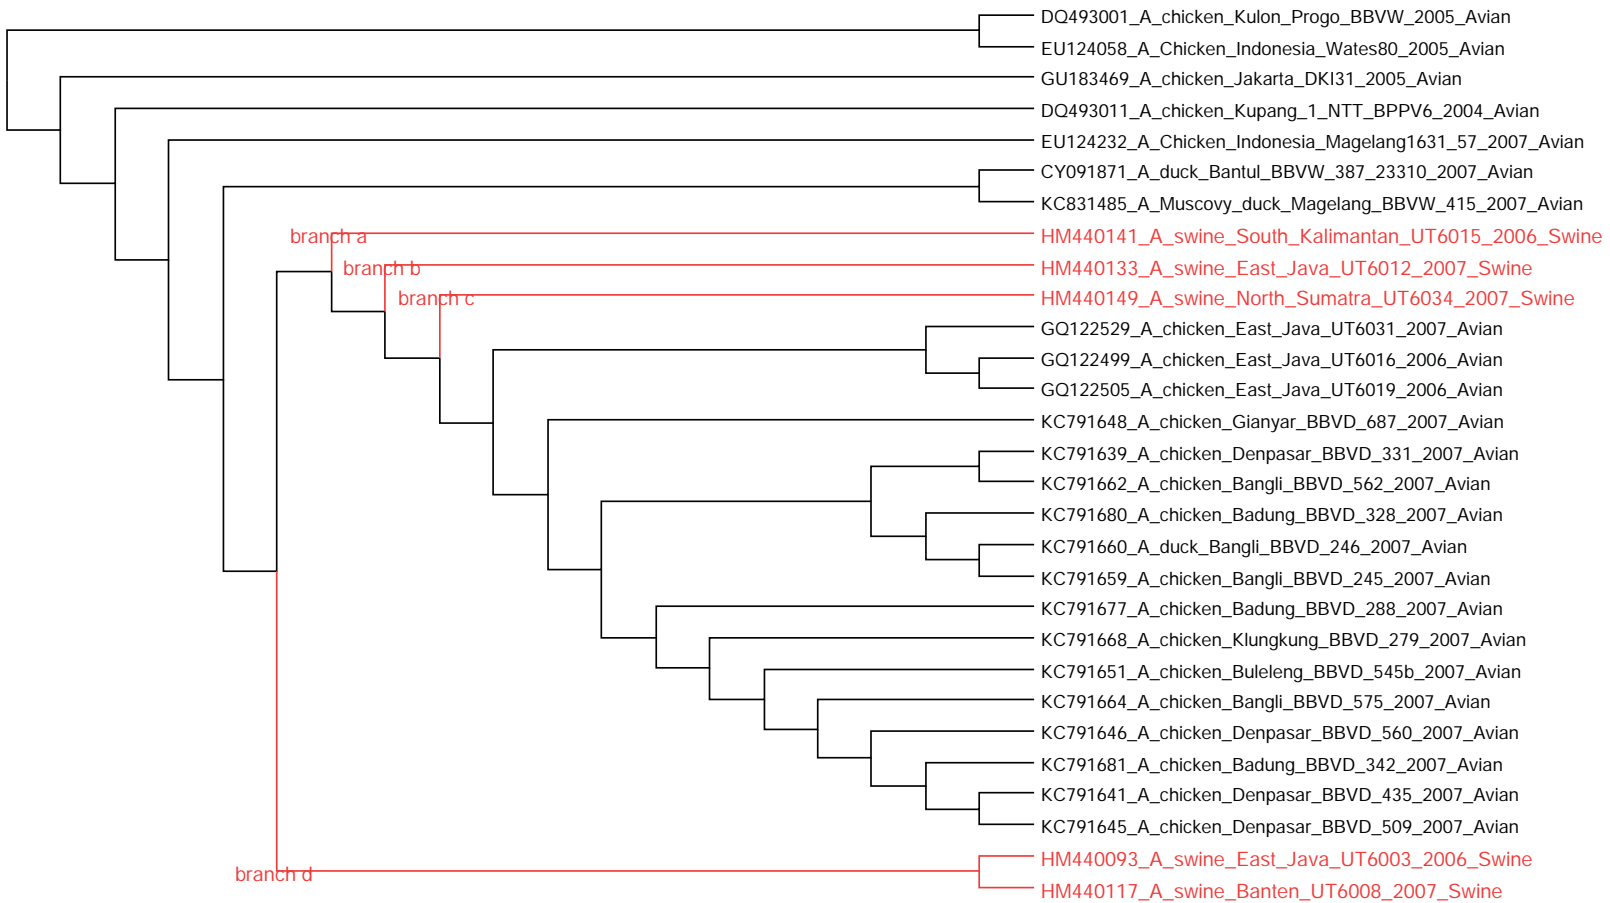

# NA1-Group75

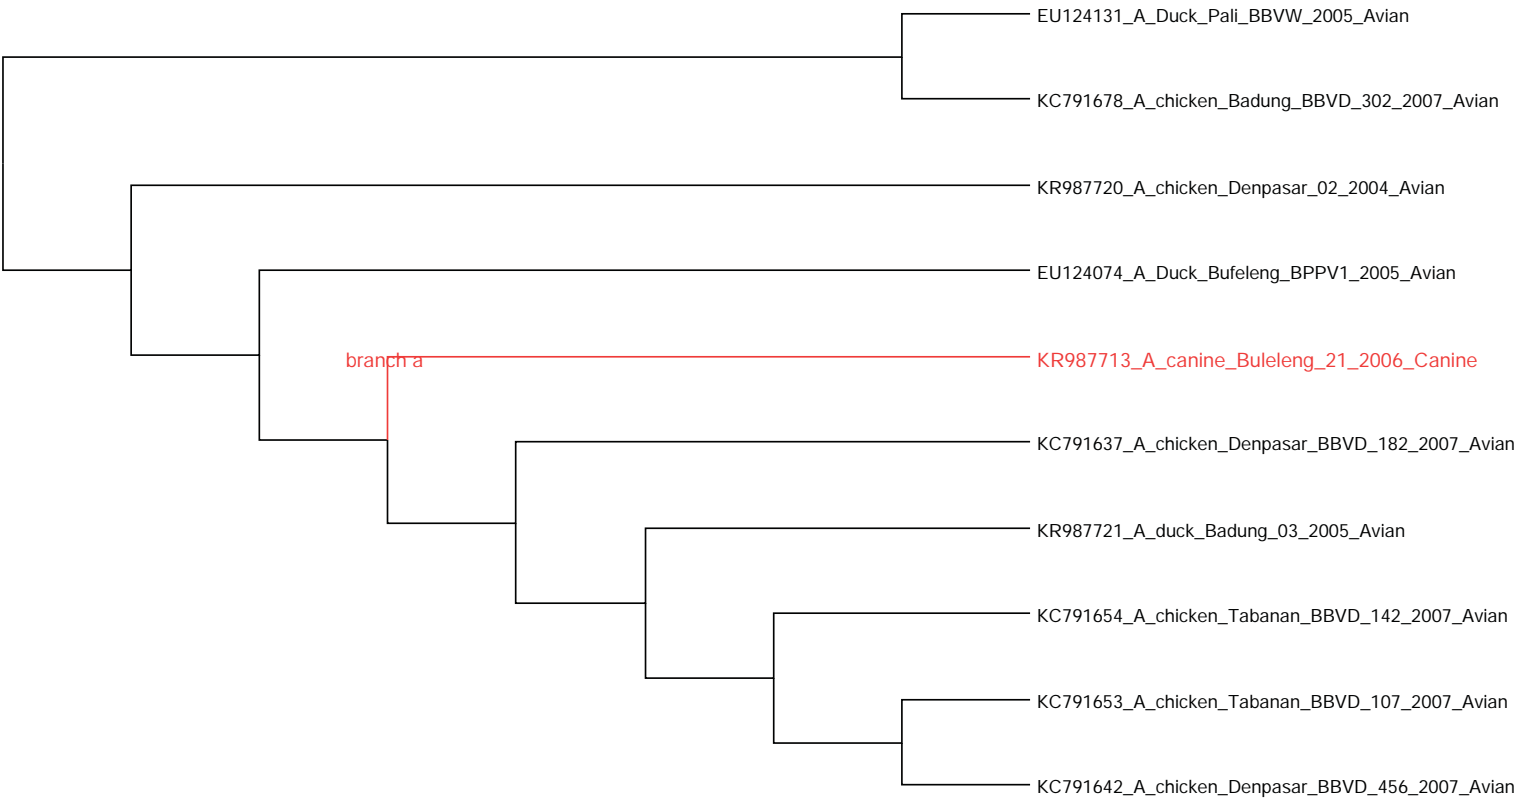

# NA1-Group76

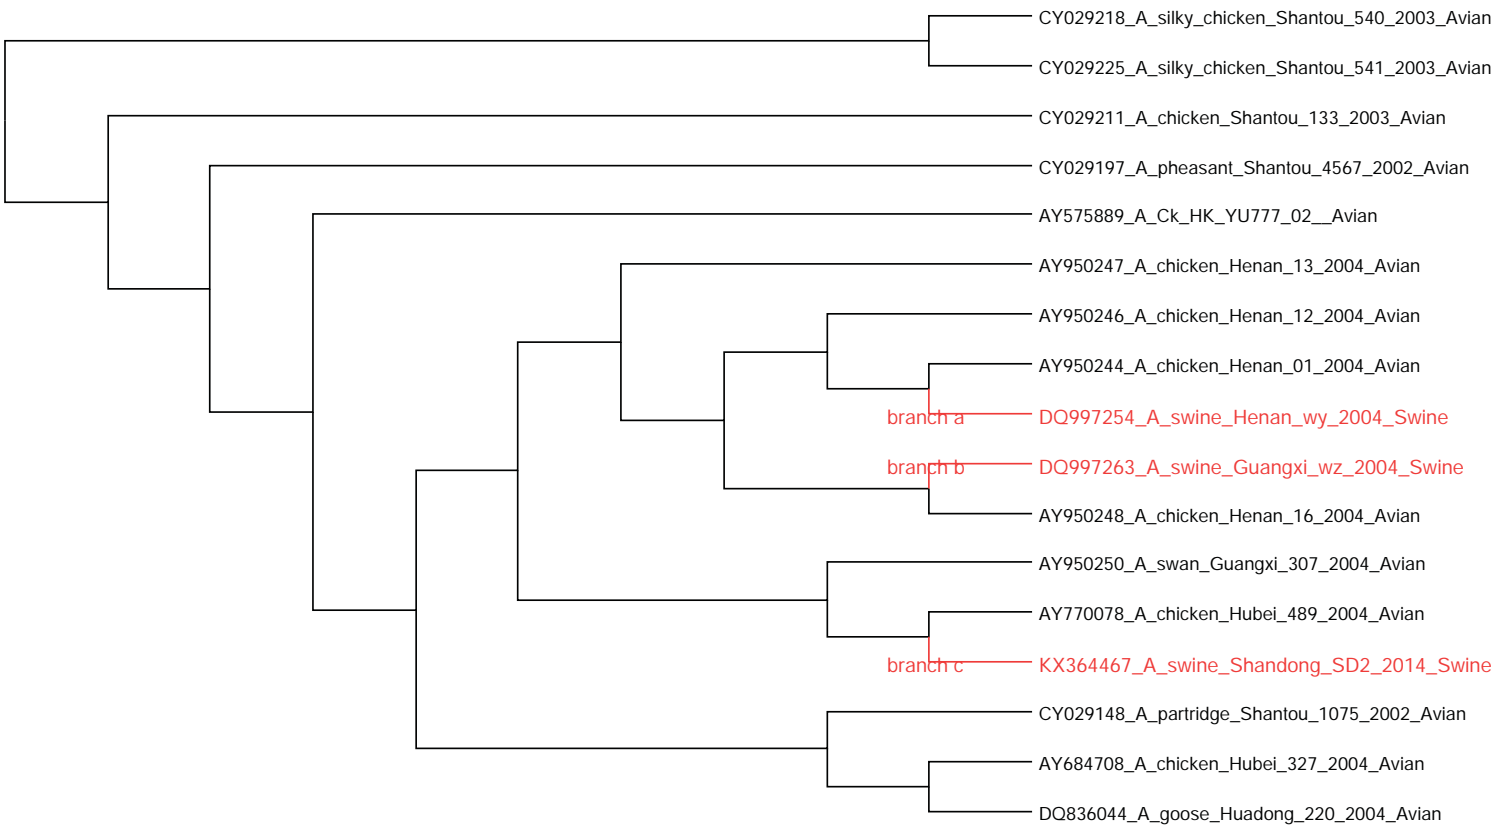

# NA1-Group77

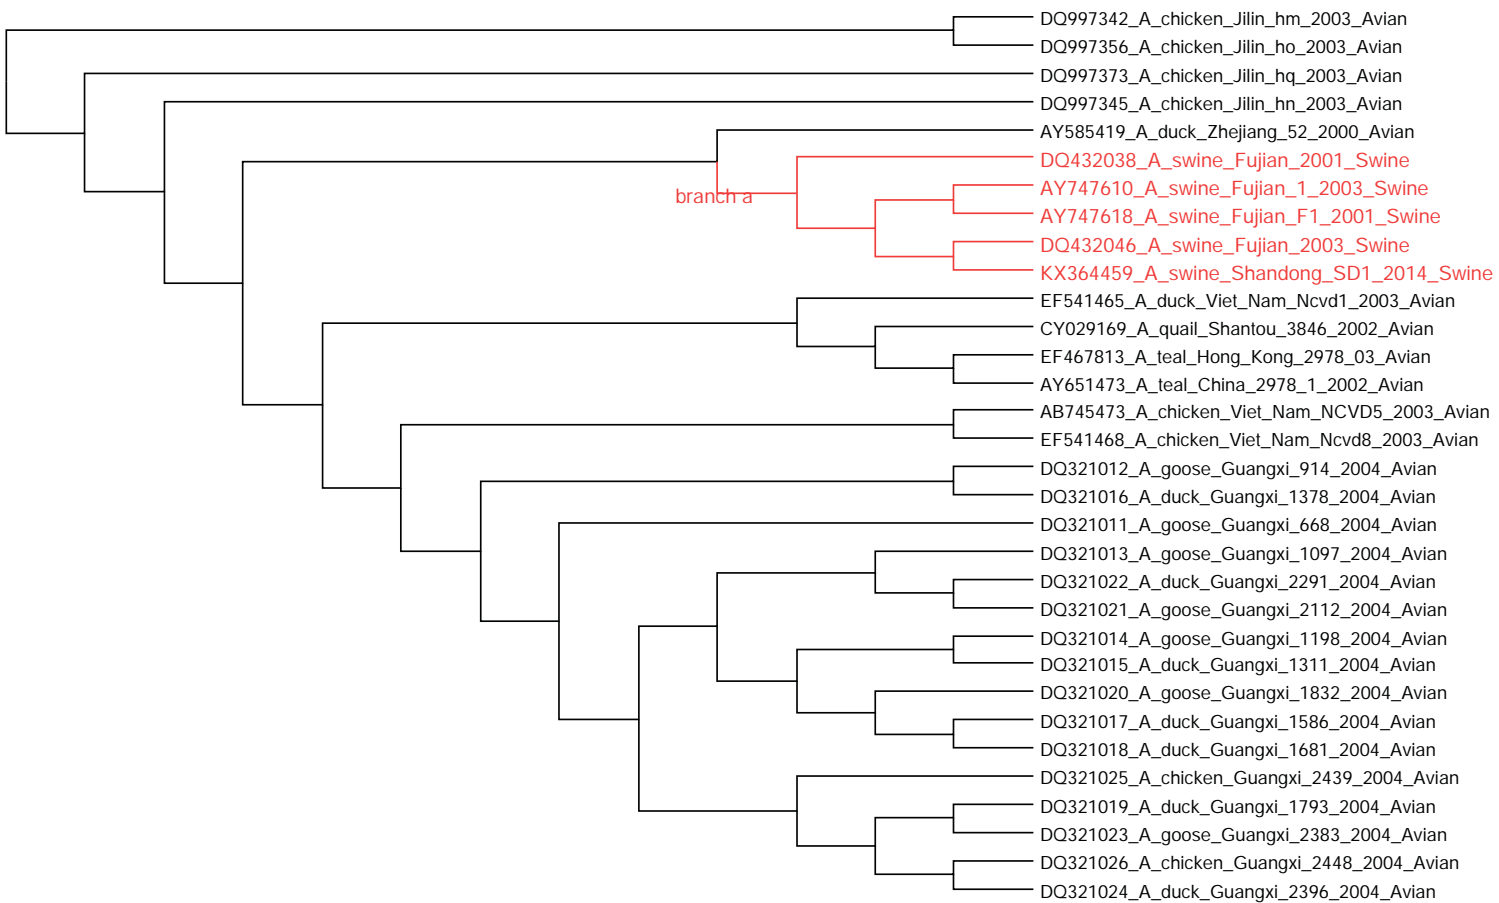

# NA1-Group78

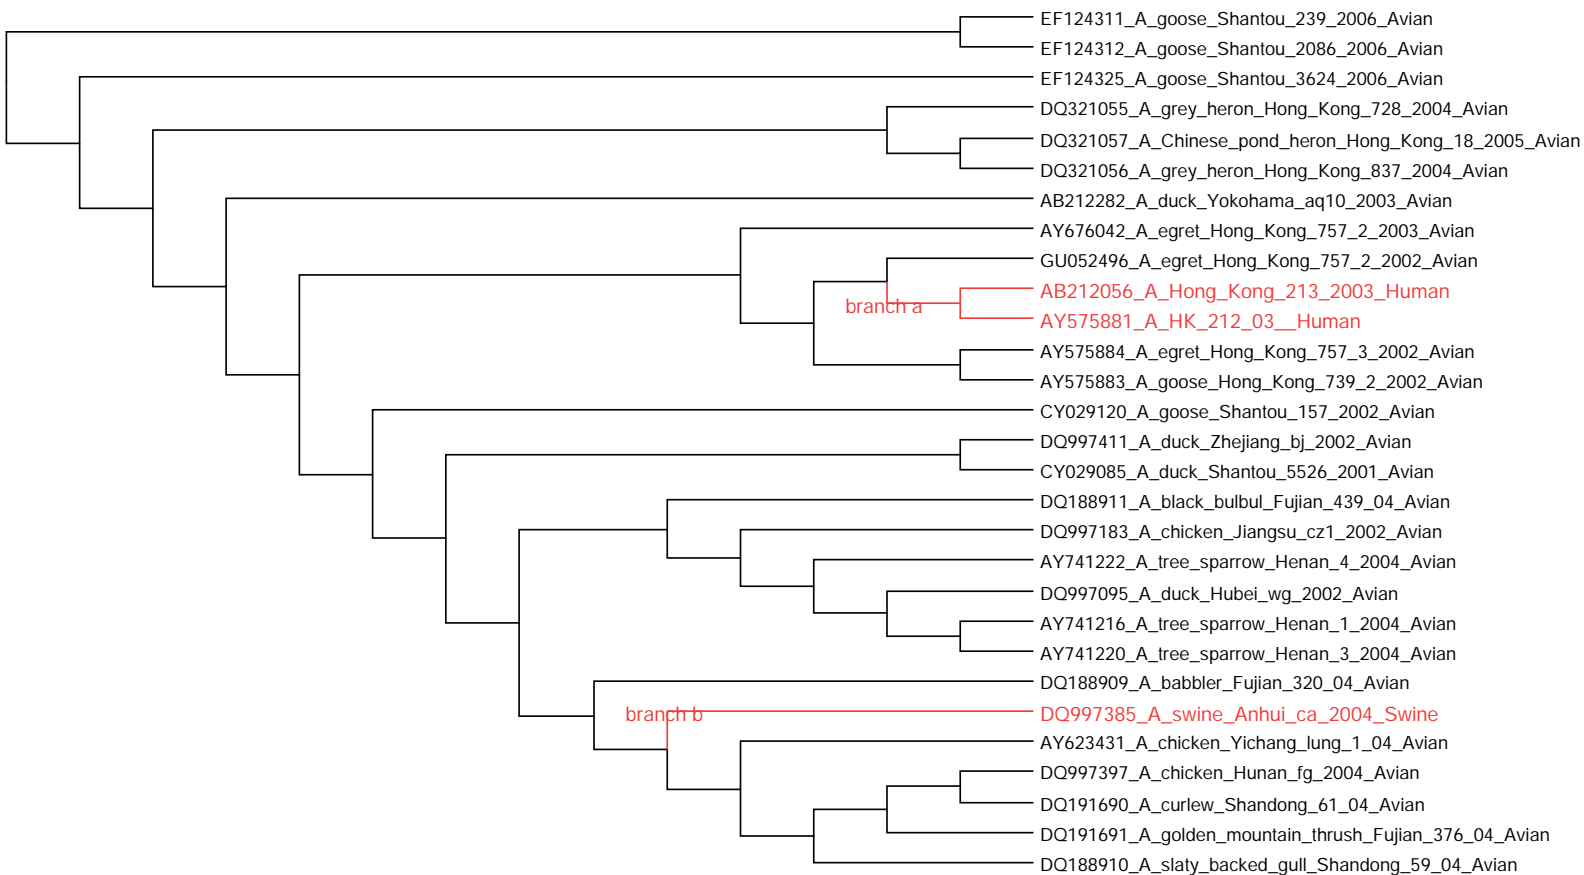

# NA1-Group79

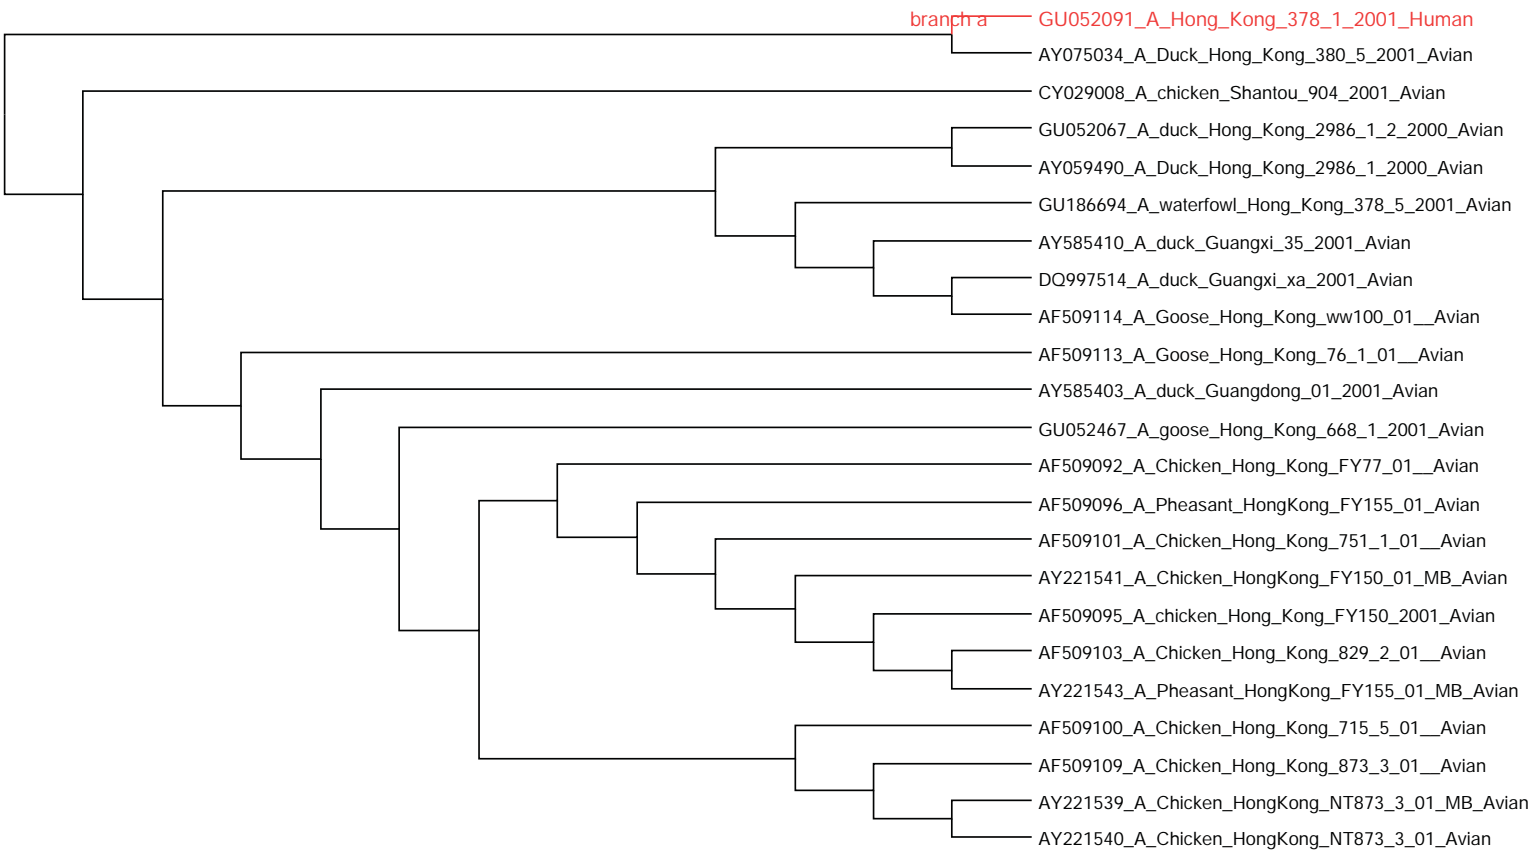

# NA1-Group80

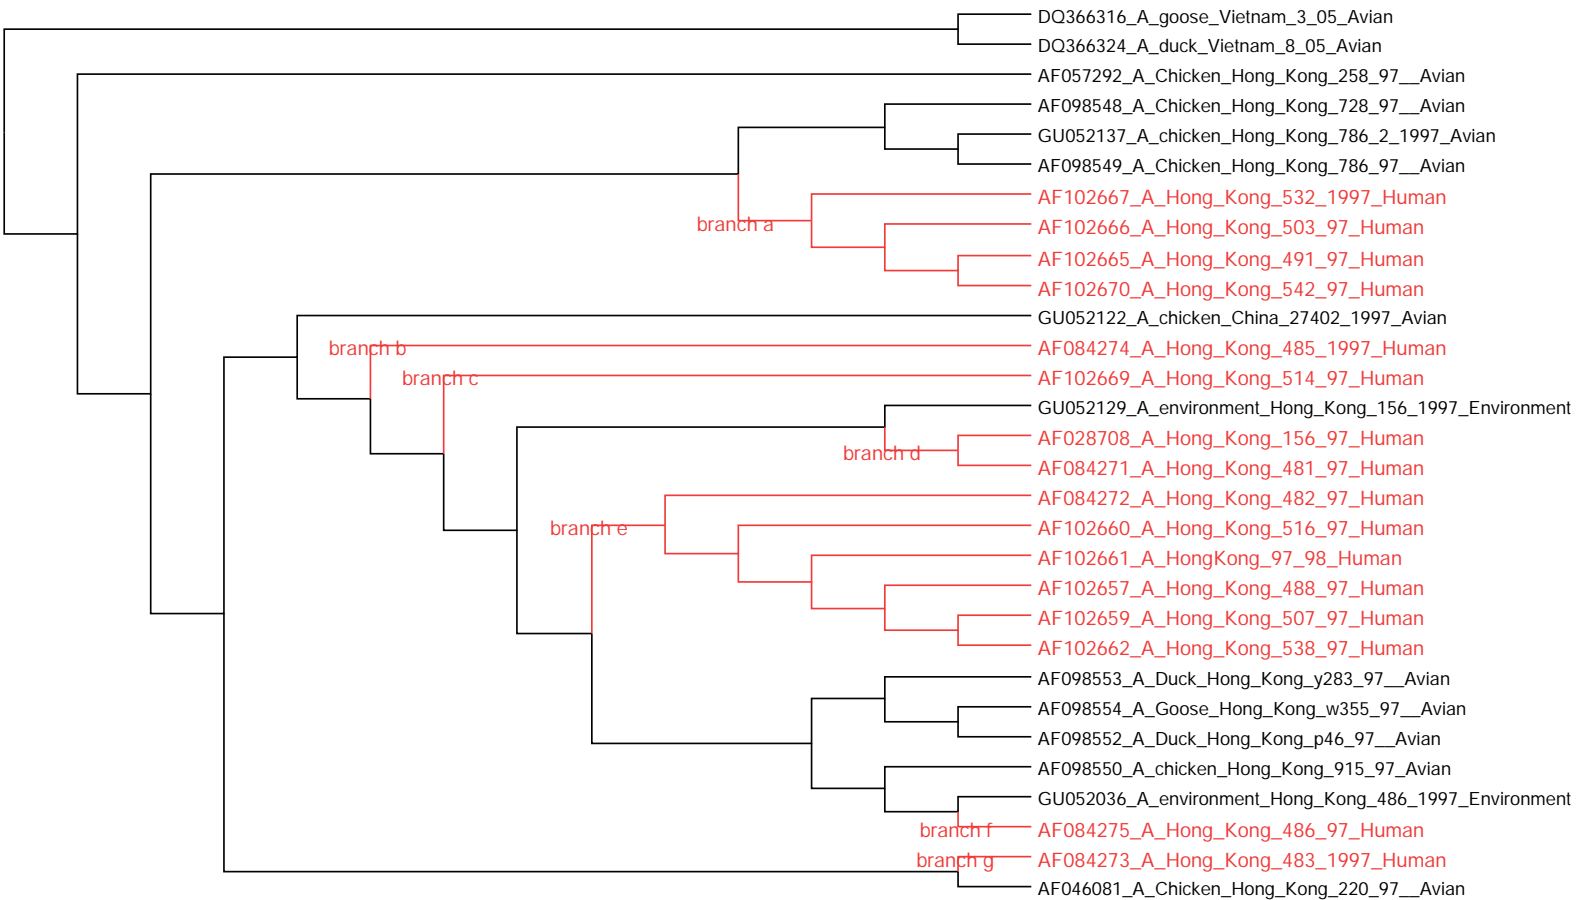



# NA1-Group81

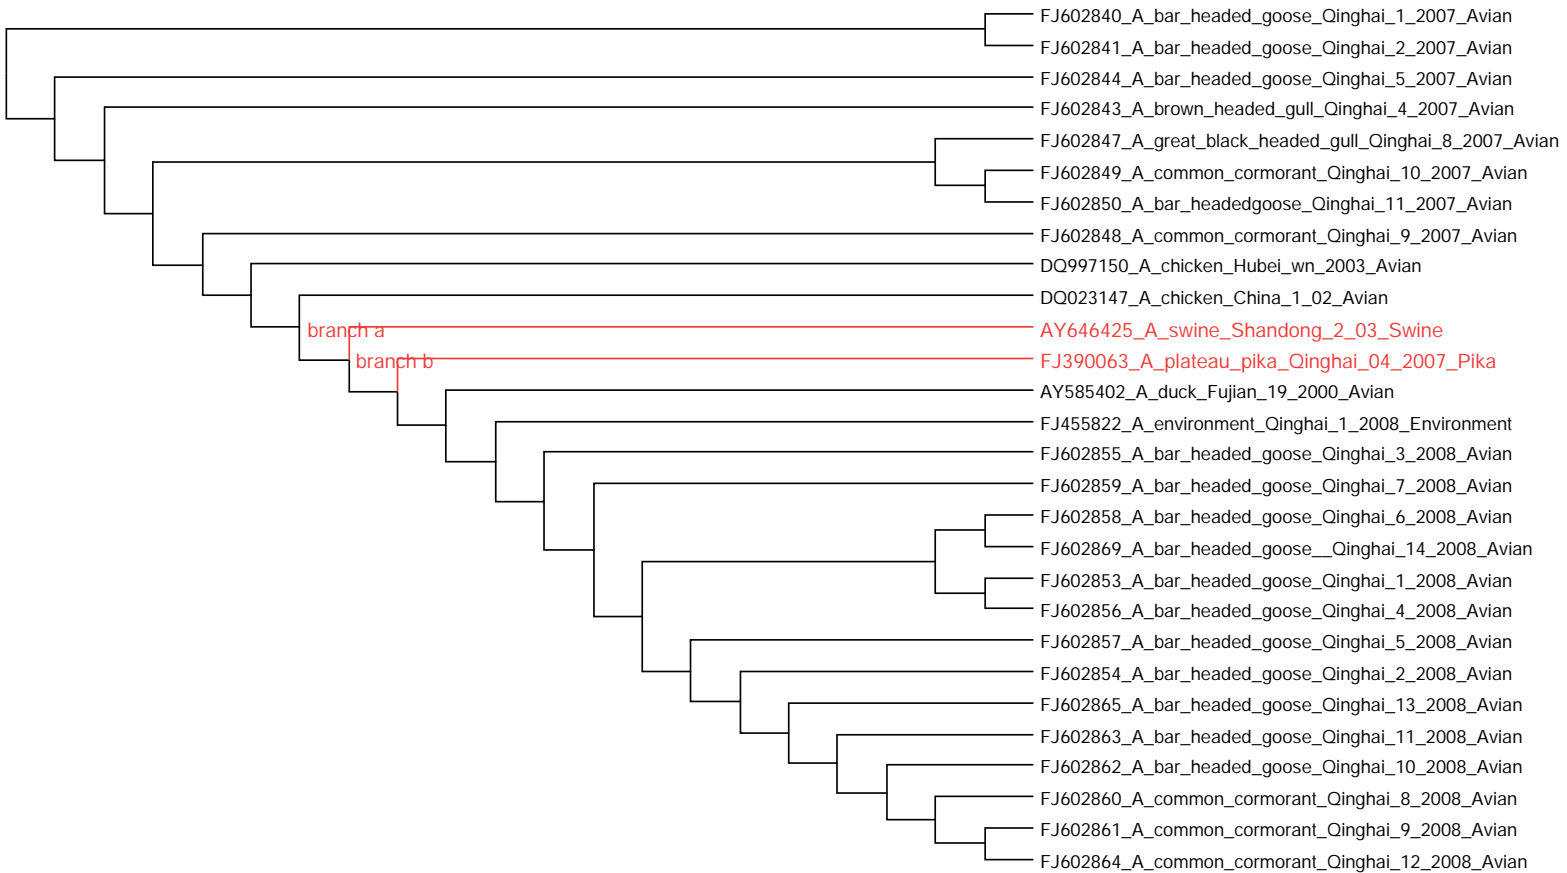

# NA1-Group82

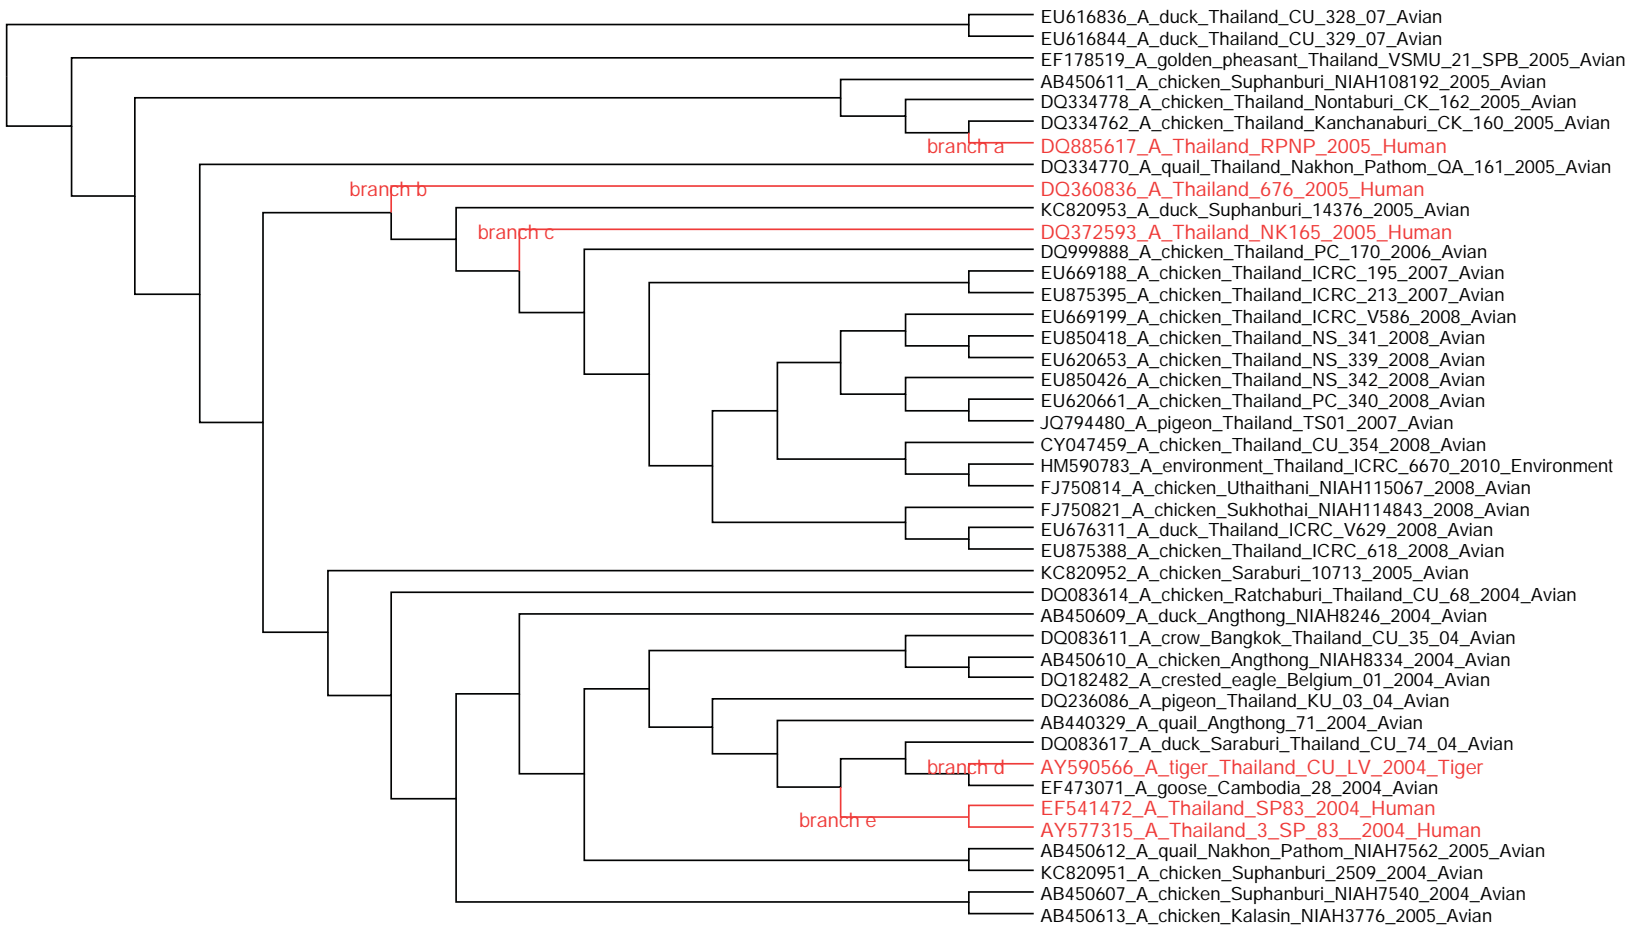

Phylogenetic tree showing relationships among 100 avian species. The tree is rooted at the bottom left and branches out to the right. Species names are listed on the right, with some names in red. Bootstrap values are indicated by numbers at the nodes. The tree is divided into several major clades, including Galliformes, Charadriiformes, and Columbiformes. The tree is labeled with 'branch' and 'branch' at the top right.

Species names (from top to bottom):

- AV55151 A. Thailand\_1\_KAN\_1\_2004\_Human
- DO885611 A. Thailand\_MKF\_2005\_Human
- DO885613 A. Thailand\_NKNP\_2005\_Human
- DO236078 A. cat\_Thailand\_KU\_02\_04\_Cat
- DO083615 A. duck\_Nakhon\_Pathom\_Thailand\_CU\_71\_04\_Avian
- AV649383 A. chicken\_Thailand\_CH\_2\_2004\_Avian
- DO885620 A. Thailand\_M60\_2005\_Human
- AV627886 A. Thailand\_5\_KK\_494\_2004\_Human
- AB450600 A. quail\_Phathumthani\_NIAH2711\_2004\_Avian
- AB576204 A. pigeon\_Thailand\_VSMU\_7\_NPT\_2004\_Avian
- EF54171 A. Thailand\_Kan353\_2004\_Human
- DO083608 A. chicken\_Saraburi\_Thailand\_CU\_27\_2004\_Avian
- DO083605 A. chicken\_Ayuthaya\_Thailand\_CU\_24\_04\_Avian
- AV770992 A. chicken\_Ayuthaya\_Thailand\_CU\_23\_04\_Avian
- AB450608 A. chicken\_Suphanburi\_NIAH7618\_2004\_Avian
- DO083607 A. rollers\_Bangkok\_Thailand\_CU\_26\_04\_Avian
- AB450602 A. chicken\_Narathiwat\_NIAH1703\_2004\_Avian
- DO321066 A. chicken\_Malaysia\_5858\_2004\_Avian
- KC684447 A. chicken\_Malaysia\_5744\_2004\_Avian
- AV972543 A. tiger\_Thailand\_CU\_14\_04\_Tiger
- AB450625 A. open\_bill\_stork\_Thailand\_VSMU\_29\_NSN\_2005\_Avian
- AB450620 A. pigeon\_Thailand\_VSMU\_13\_KRI\_2005\_Avian
- DO083618 A. chicken\_Praichinburi\_Thailand\_CU\_104\_04\_Avian
- AB450622 A. tree\_sparrow\_Thailand\_VSMU\_14\_KRI\_2005\_Avian
- EF512562 A. Prachinburi\_6231\_2004\_Human
- GU186642 A. unknown\_Praichinburi\_Thailand\_6231\_2004\_
- EF178533 A. tiger\_Thailand\_VSMU\_23\_CBI\_2004\_Tiger
- AV972546 A. tiger\_Thailand\_CU\_T8\_04\_Tiger
- AB450624 A. tree\_sparrow\_Ratchaburi\_VSMU\_16\_RBR\_2005\_Avian
- AB450623 A. open\_bill\_stork\_Thailand\_VSMU\_15\_ATG\_2005\_Avian
- AB450596 A. chicken\_Kalasin\_NIAH316\_2004\_Avian
- AB450621 A. tree\_sparrow\_Thailand\_VSMU\_12\_KRI\_2005\_Avian
- GO466177 A. Thailand\_NBL\_1\_2006\_Human
- AB450604 A. chicken\_Samutprakan\_NIAH6604\_2004\_Avian
- HO025951 A. Silver\_Pheasant\_Thailand\_VSMU\_1\_CBI\_2005\_Avian
- AV866476 A. tiger\_Thailand\_CU\_T7\_2004\_Tiger
- AV972545 A. tiger\_Thailand\_CU\_T6\_04\_Tiger
- EF178507 A. tree\_sparrow\_Thailand\_VSMU\_16\_RBR\_2005\_Avian
- DO30175 A. dog\_Thailand\_Suphanburi\_KU\_08\_04\_Canine
- AV842936 A. tiger\_Thailand\_CU\_T3\_2004\_Tiger
- AV972544 A. tiger\_Thailand\_CU\_T5\_04\_Tiger
- AB450603 A. chicken\_Loel\_NIAH2373\_2004\_Avian
- DO083606 A. crow\_Bangkok\_Thailand\_CU\_25\_04\_Avian
- DO321065 A. quail\_Malaysia\_5309\_2005\_Avian
- AB450605 A. chicken\_Sawen\_NIAH01502\_2004\_Avian
- CY047453 A. chicken\_Thailand\_CU\_353\_2008\_Avian
- AB450618 A. common\_myra\_Thailand\_VSMU\_10\_BRM\_2005\_Avian
- EF112324 A. open\_billed\_stork\_Nakhonsawan\_BBD2316f\_05\_Avian
- EF112342 A. open\_billed\_stork\_Nakhonsawan\_BBD2516f\_05\_Avian
- EF112332 A. open\_billed\_stork\_Nakhonsawan\_BBA2611M\_05\_Avian
- EF112332 A. open\_billed\_stork\_Nakhonsawan\_BBA2611M\_05\_Avian
- EF112328 A. open\_billed\_stork\_Nakhonsawan\_BBD3209M\_05\_Avian
- EF112339 A. open\_billed\_stork\_Nakhonsawan\_BBD4011M\_05\_Avian
- EF112330 A. open\_billed\_stork\_Nakhonsawan\_BBD3509M\_05\_Avian
- EF112329 A. open\_billed\_stork\_Nakhonsawan\_BBD3309M\_05\_Avian
- EF112334 A. open\_billed\_stork\_Nakhonsawan\_BBA2811M\_05\_Avian
- EF112341 A. open\_billed\_stork\_Nakhonsawan\_BBD4411M\_05\_Avian
- EF112326 A. open\_billed\_stork\_Nakhonsawan\_BBD2416f\_05\_Avian
- EF112327 A. open\_billed\_stork\_Nakhonsawan\_BBD3009M\_05\_Avian
- DO990005 A. open\_billed\_stork\_Nakhonsawan\_BBA3011M\_2005\_Avian
- EF112335 A. open\_billed\_stork\_Nakhonsawan\_BBA2911M\_05\_Avian
- AB450606 A. chicken\_Nakhon\_Sawen\_NIAH01503\_2004\_Avian
- EF112323 A. open\_billed\_stork\_Nakhonsawan\_BBD1821J\_05\_Avian
- EF112320 A. open\_billed\_stork\_Nakhonsawan\_BBD1421J\_05\_Avian
- EF112322 A. open\_billed\_stork\_Nakhonsawan\_BBD1721J\_05\_Avian
- EF112319 A. open\_billed\_stork\_Nakhonsawan\_BBD1221J\_05\_Avian
- EF112321 A. open\_billed\_stork\_Nakhonsawan\_BBD1621J\_05\_Avian
- EF112340 A. open\_billed\_stork\_Nakhonsawan\_BBD4211M\_05\_Avian
- DO98989 A. open\_billed\_stork\_Nakhonsawan\_BBD1521J\_2005\_Avian
- EF112343 A. open\_billed\_stork\_Nakhonsawan\_BBD3616M\_05\_Avian
- EF112344 A. open\_billed\_stork\_Nakhonsawan\_BBA0627M\_05\_Avian
- EF112333 A. open\_billed\_stork\_Nakhonsawan\_BBA2711M\_05\_Avian
- DO98997 A. open\_billed\_stork\_Nakhonsawan\_BBD2616f\_2005\_Avian
- CY047463 A. chicken\_Thailand\_CU\_355\_2008\_Avian
- EF112331 A. open\_billed\_stork\_Nakhonsawan\_BBA2111M\_05\_Avian

NA1-Group83

# NA1-Group83

# NA1-Group84

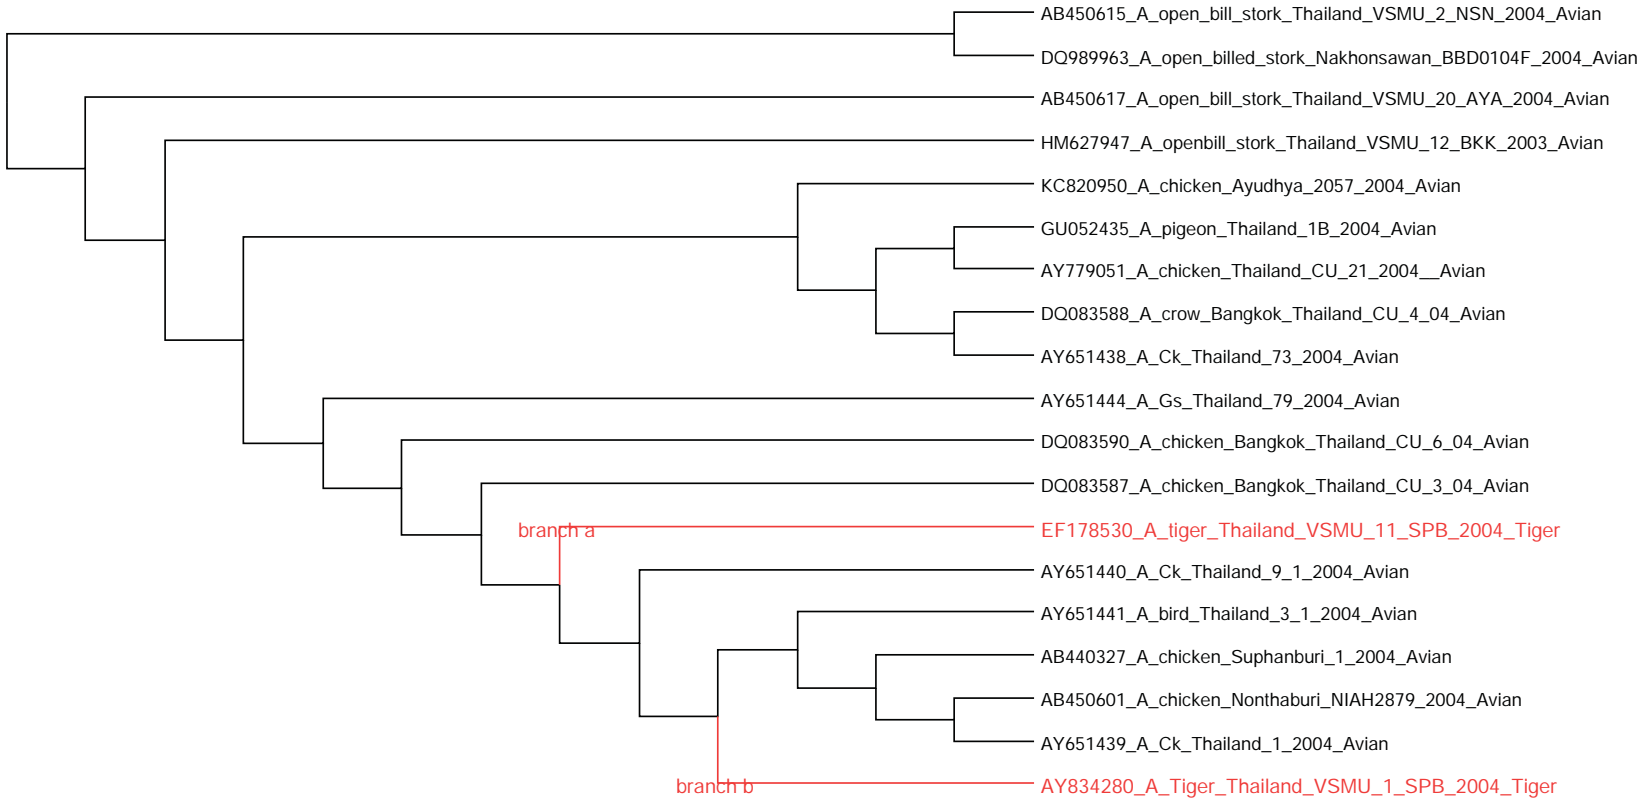

# NA1-Group85

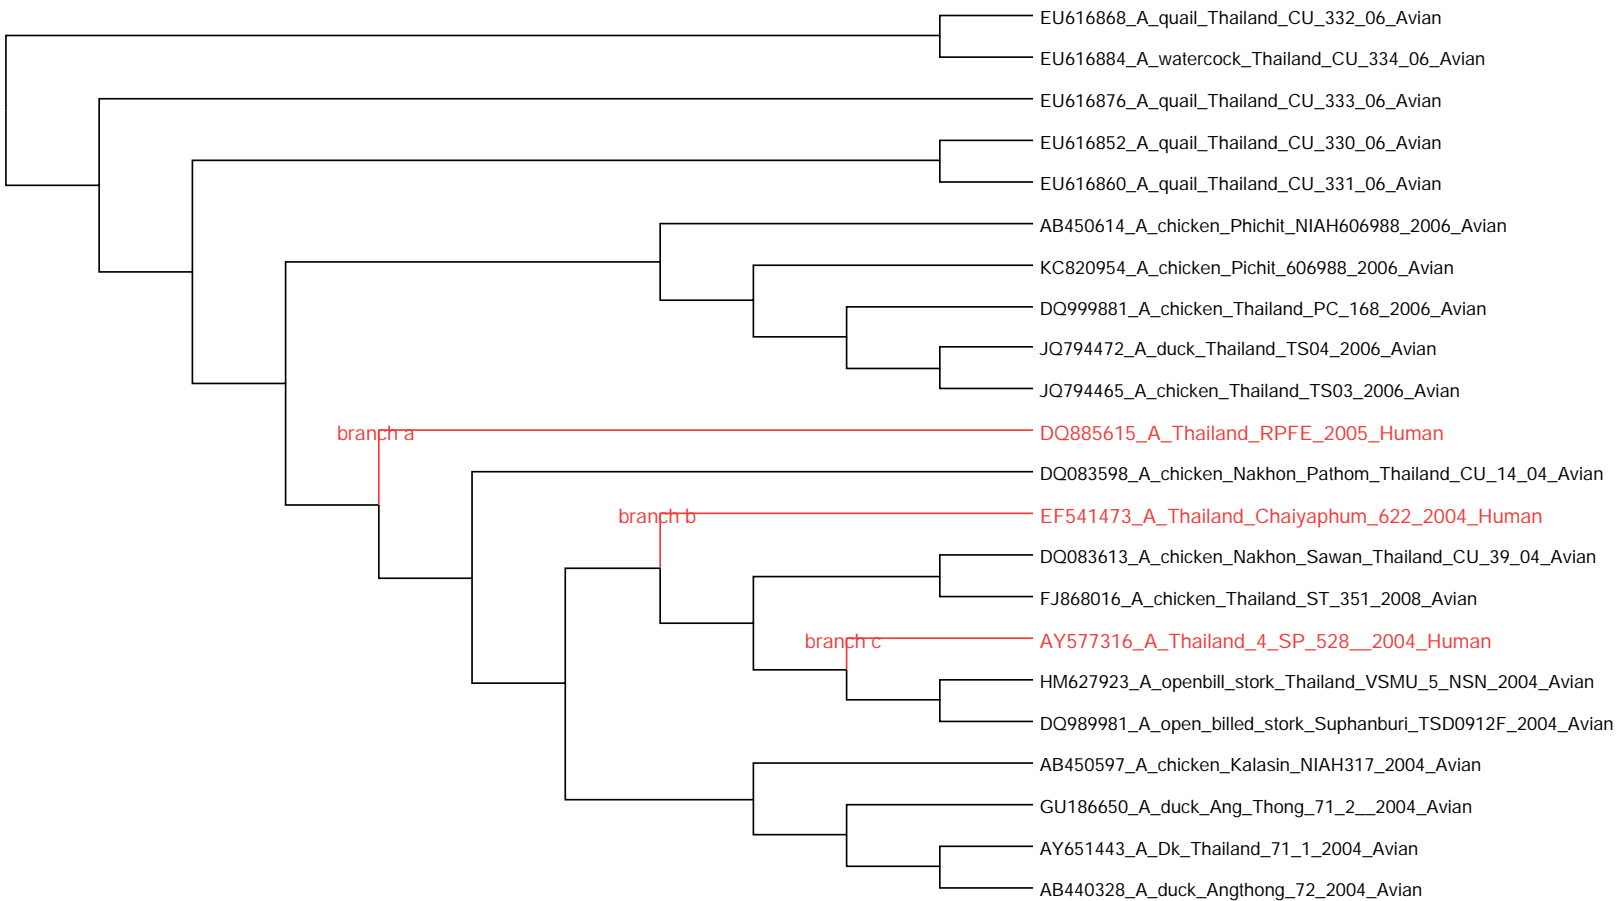

# NA1-Group86

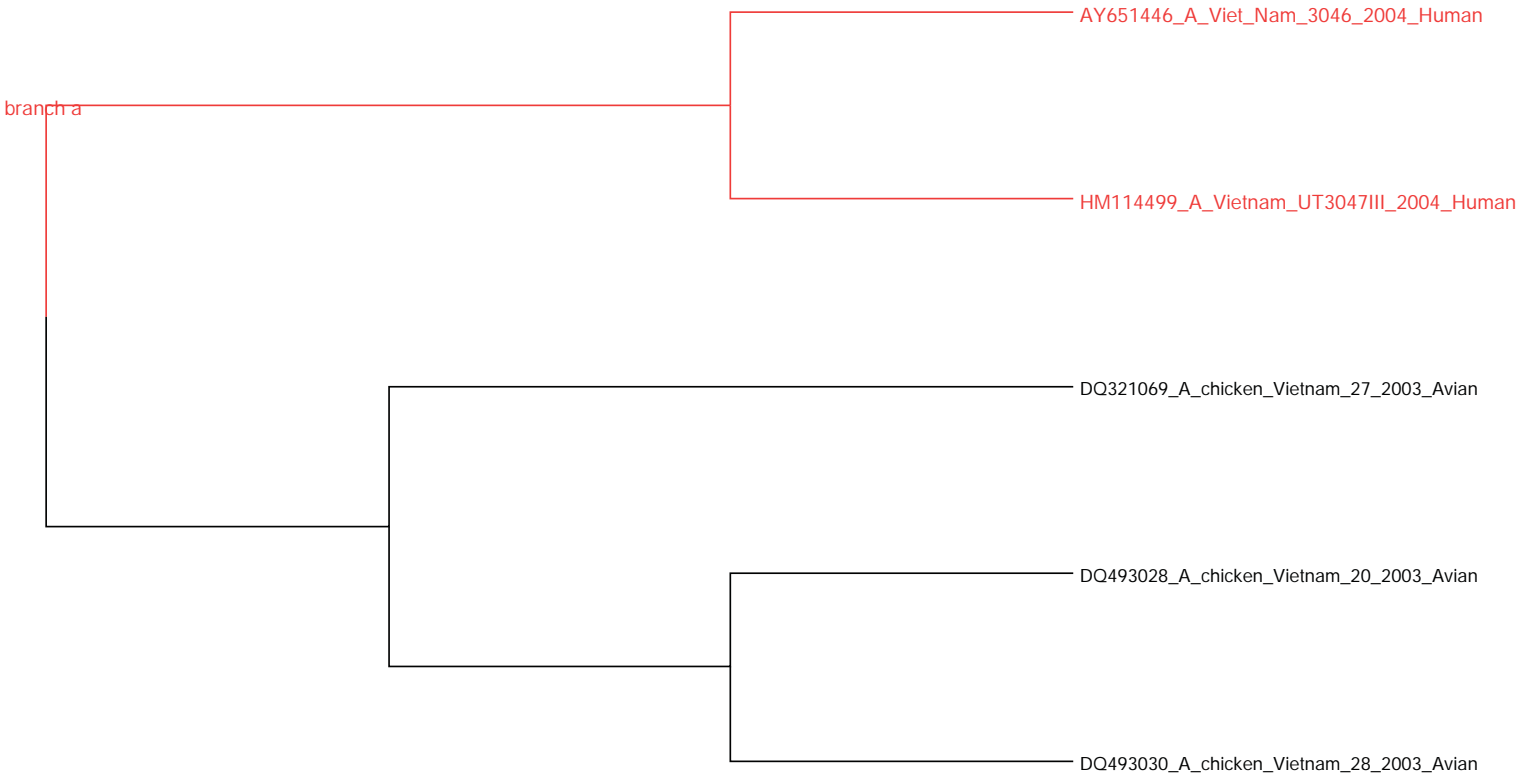

# NA1-Group87

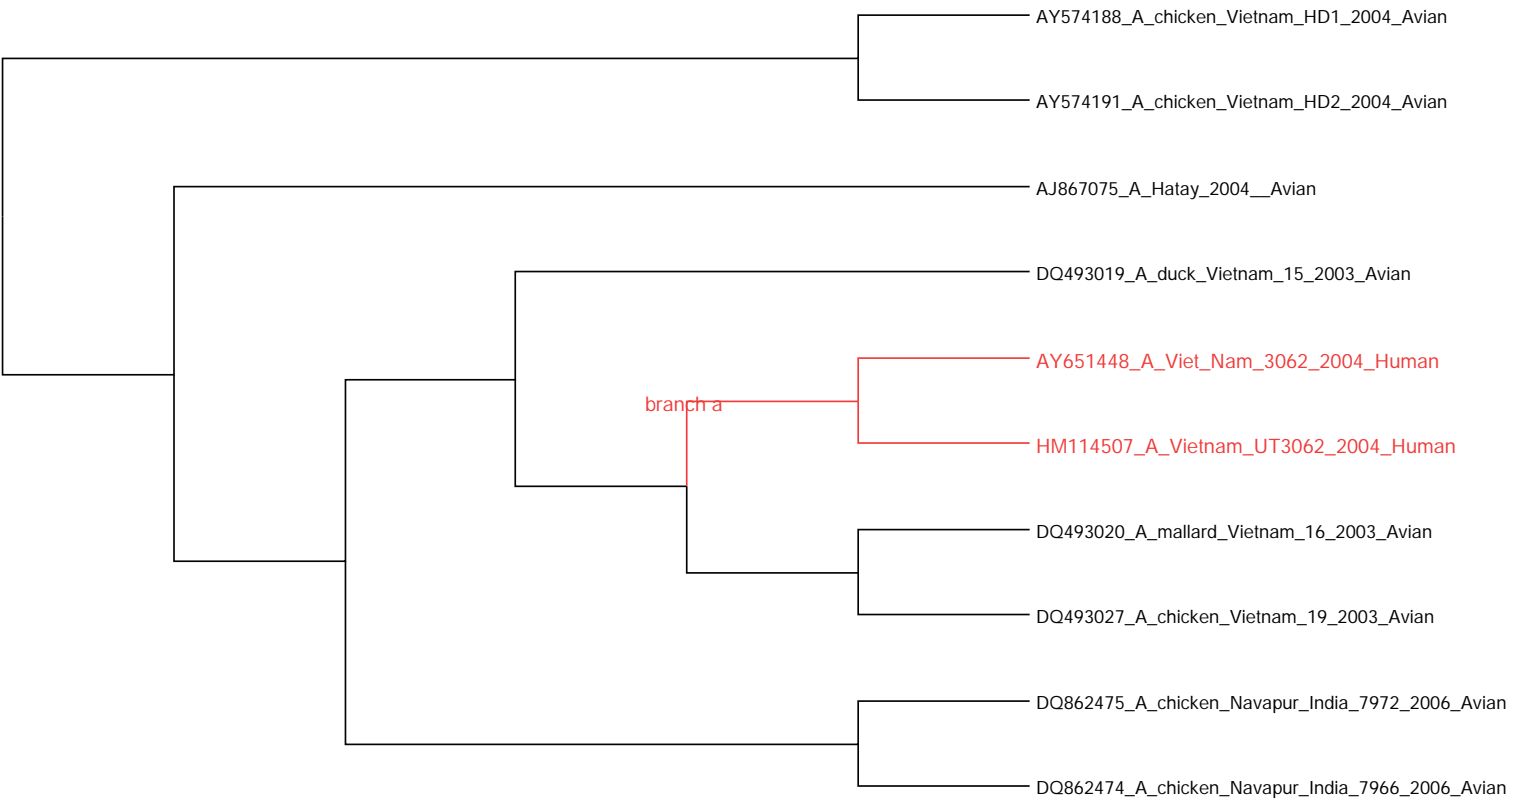

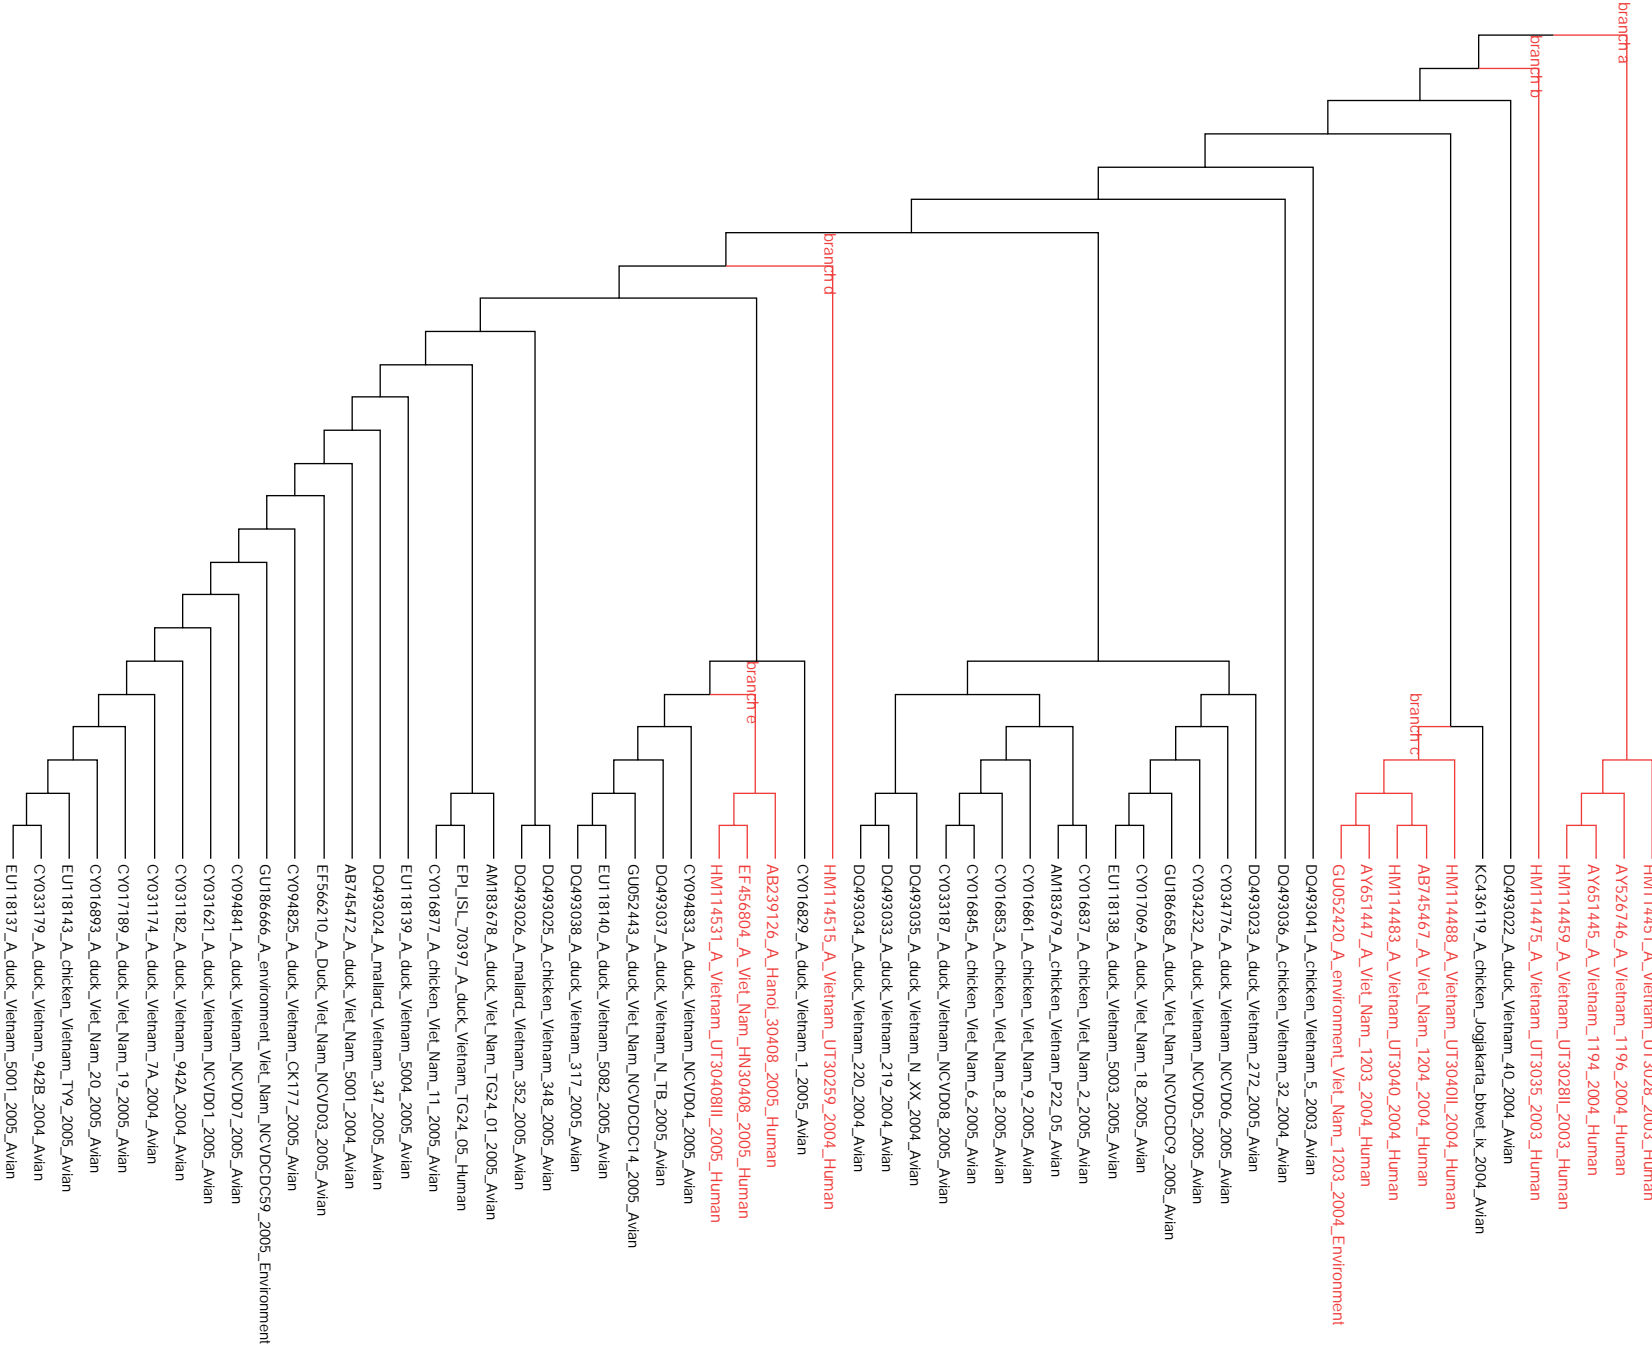

NA1-Group88

# NA1-Group88



# NA1-Group89

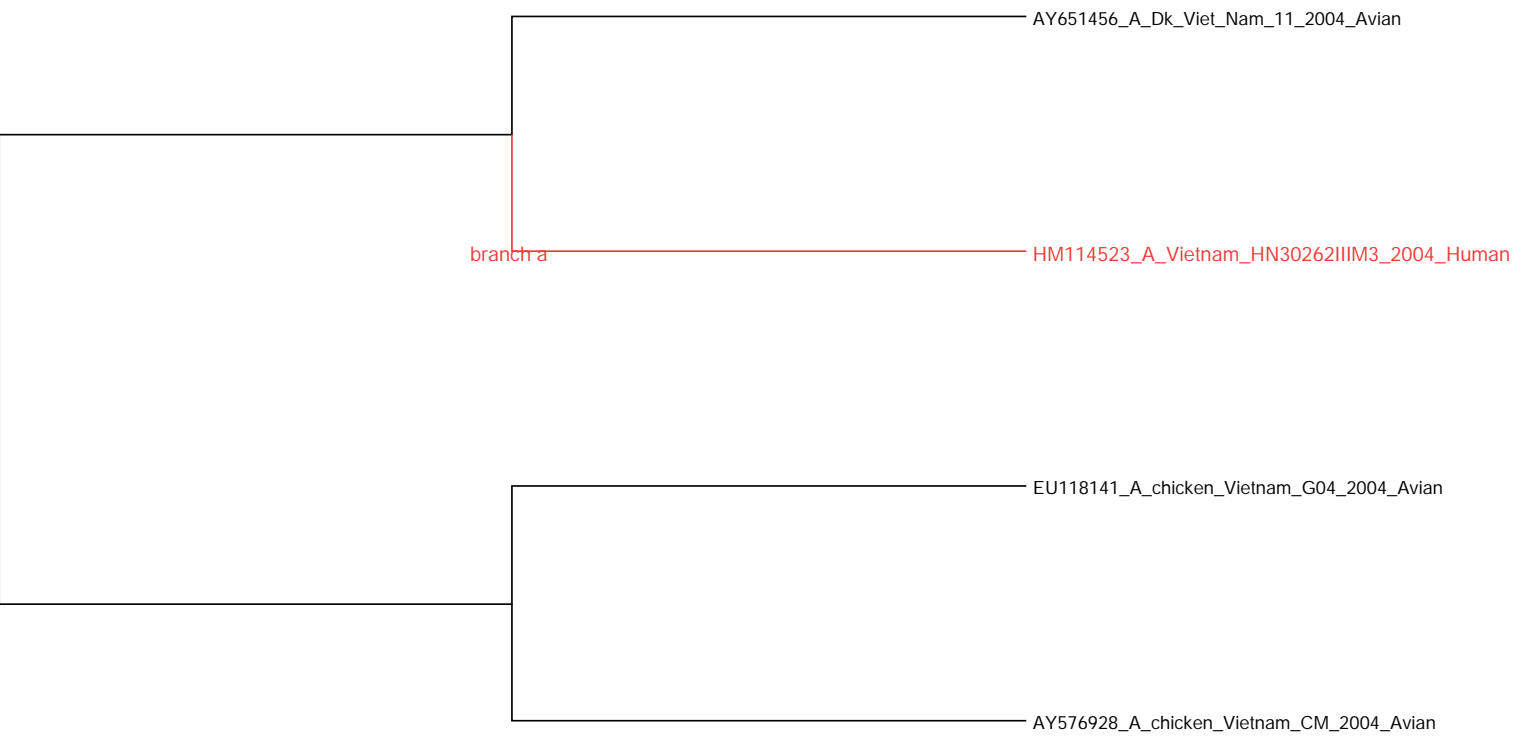

# NA1-Group90

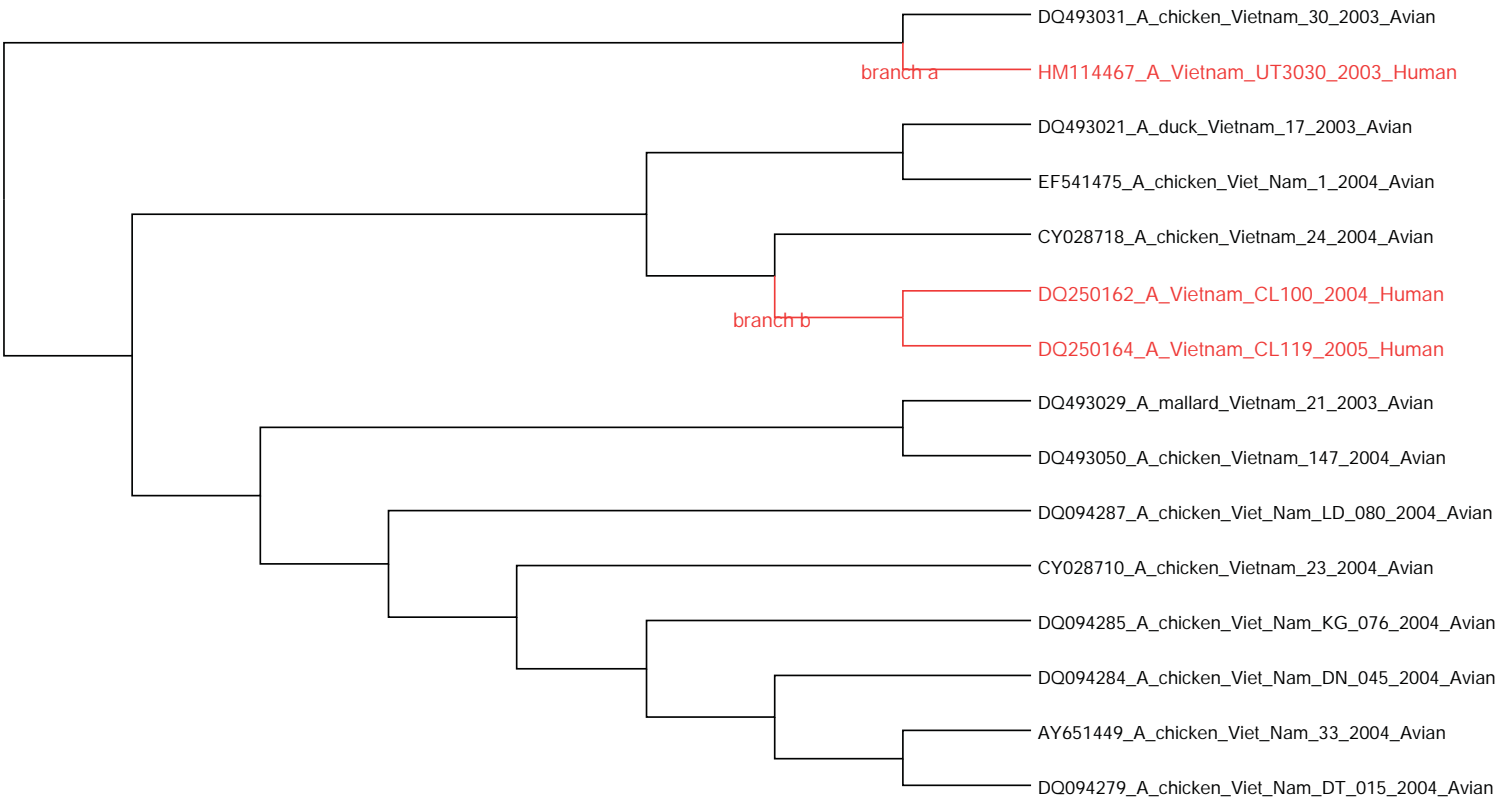

# NA1-Group91

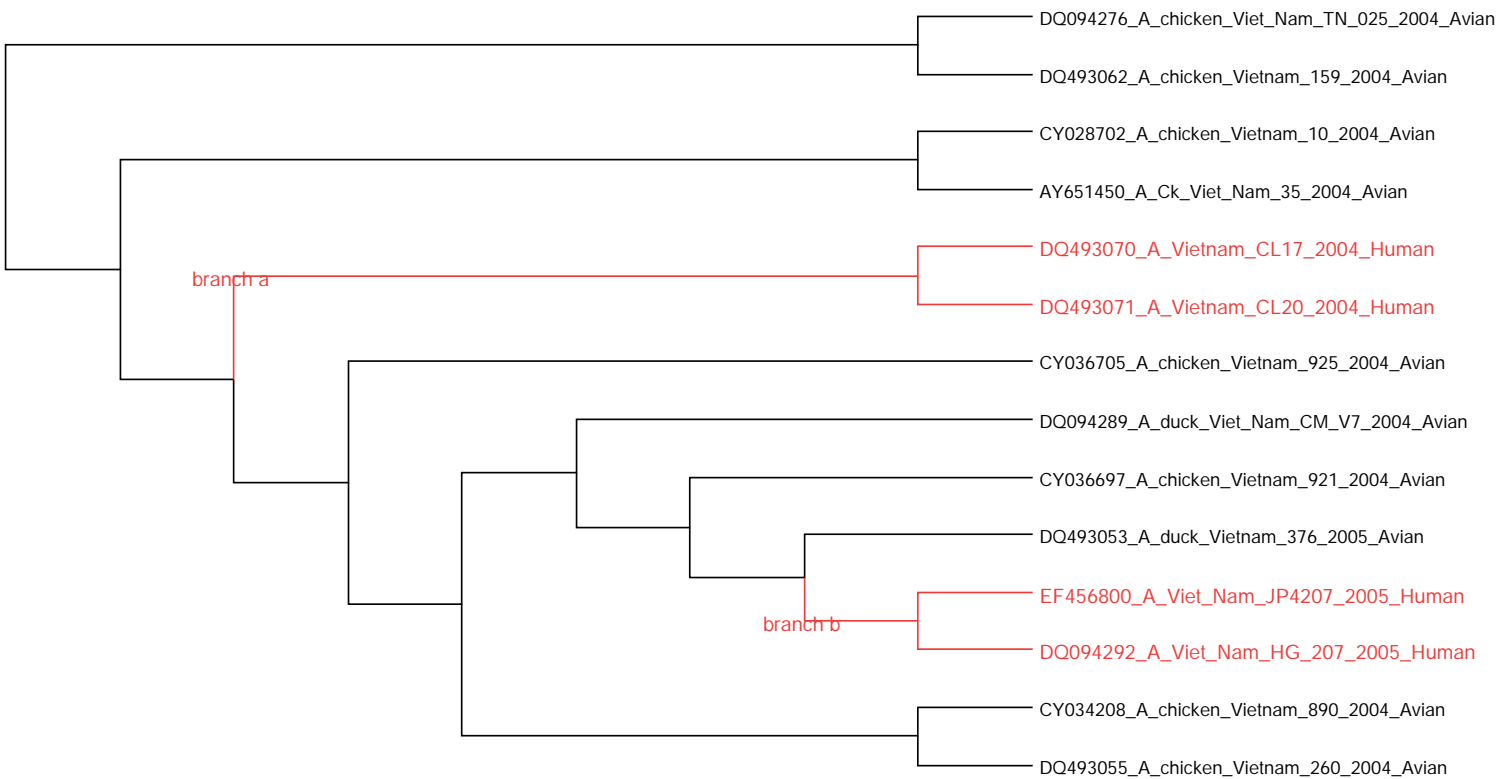

# NA1-Group92

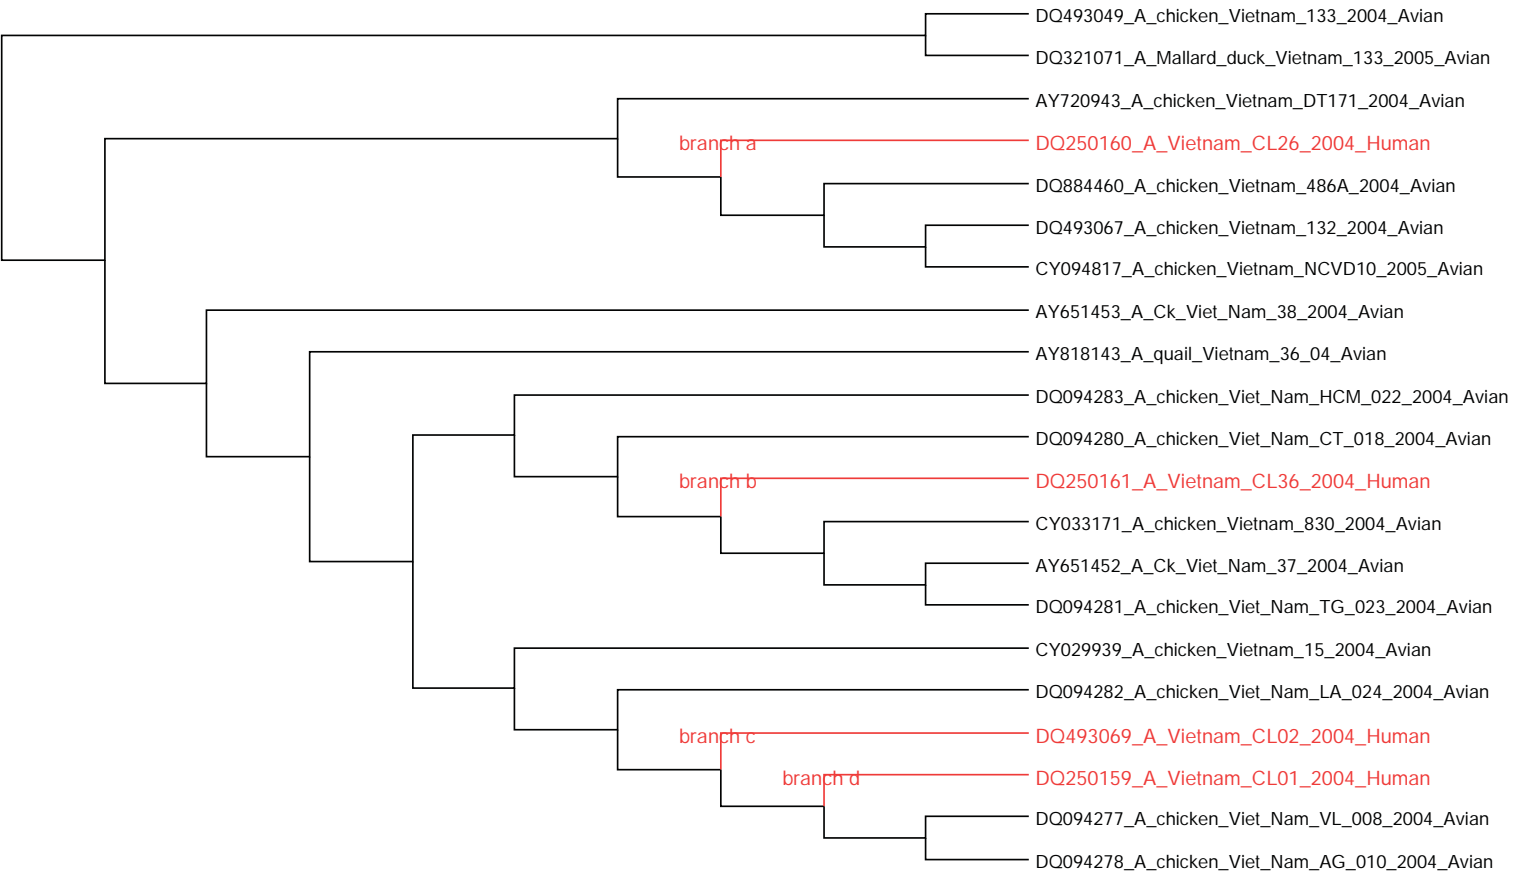

# NA1-Group93

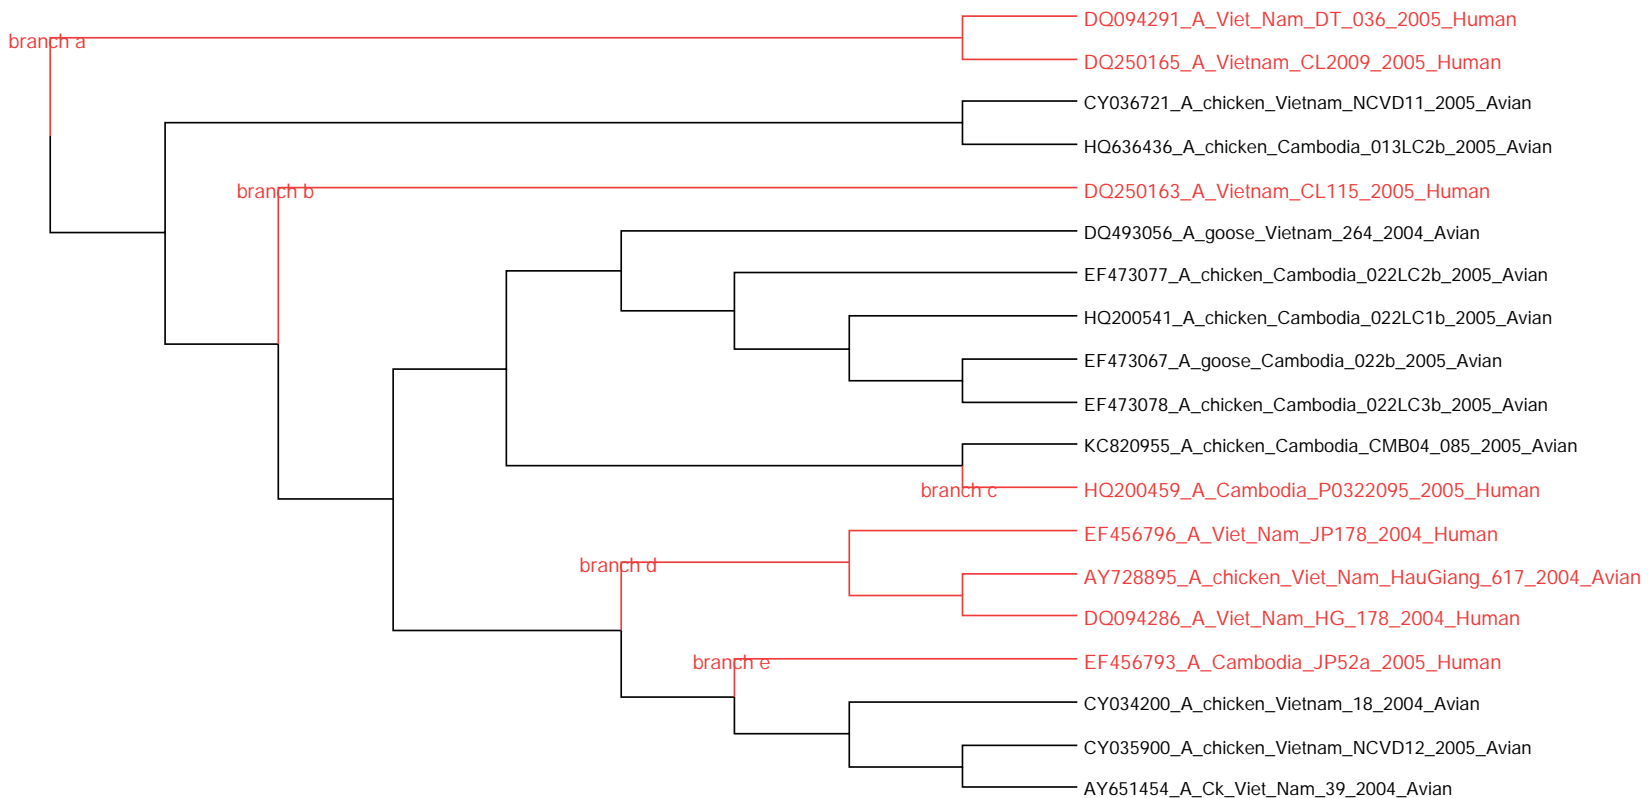

# NA1-Group94

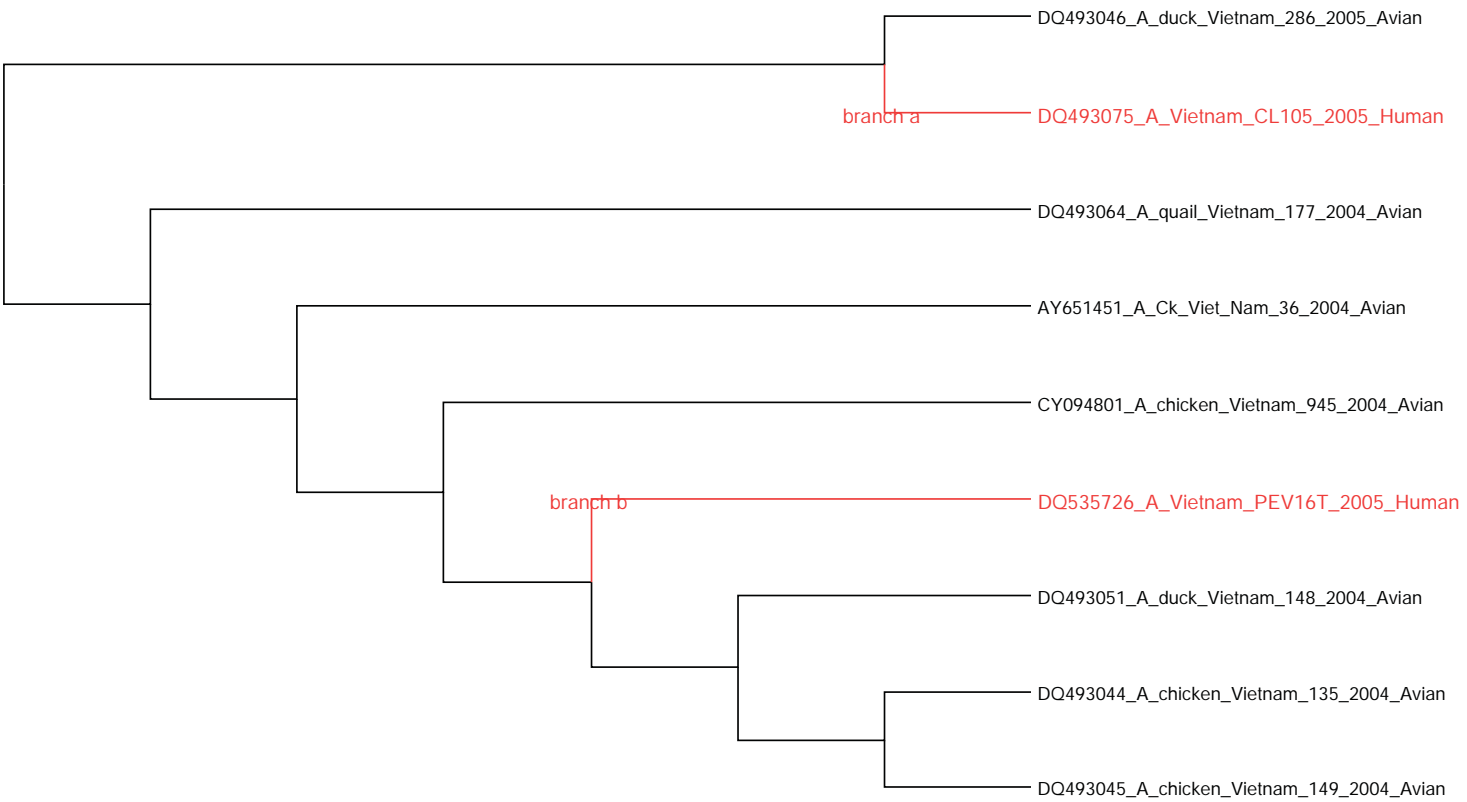

# NA1-Group95

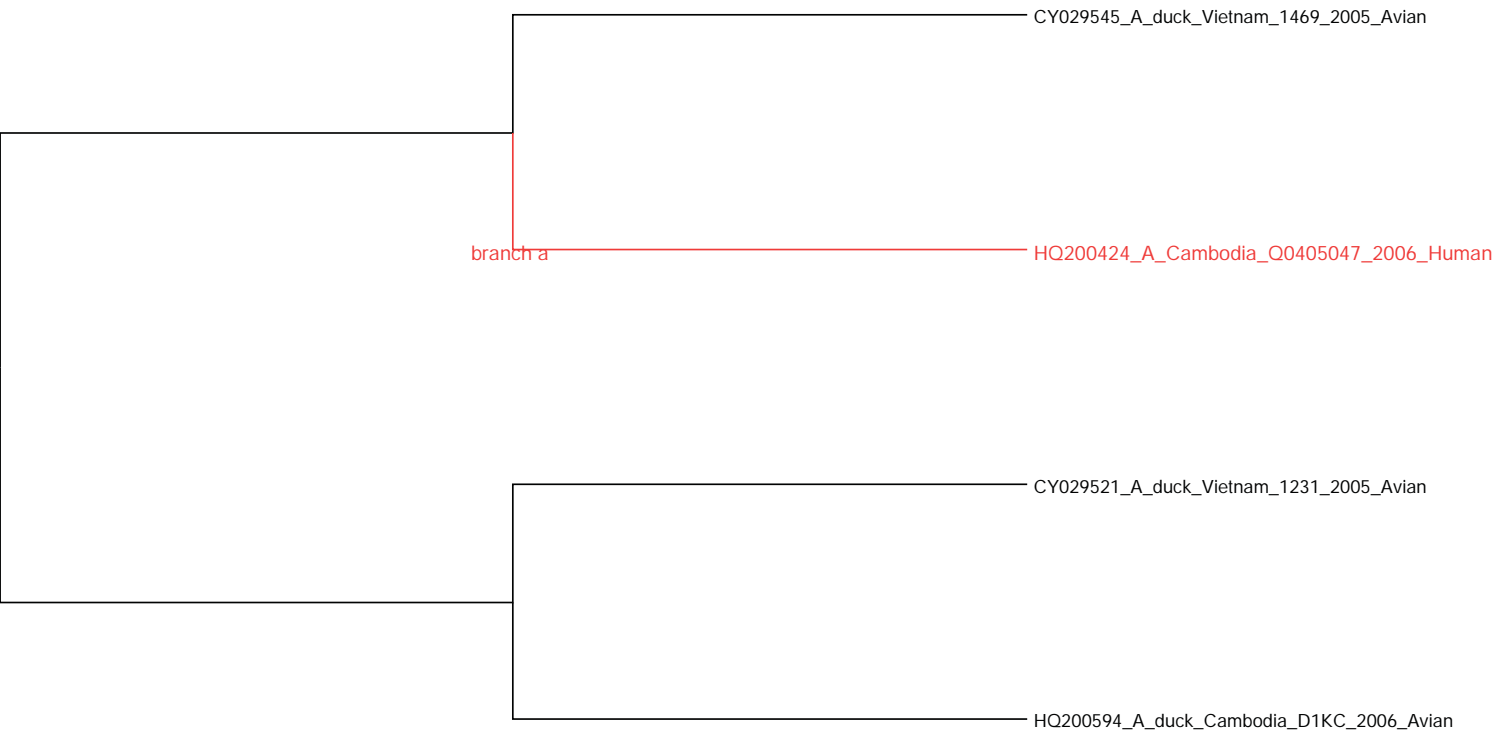

# NA1-Group96

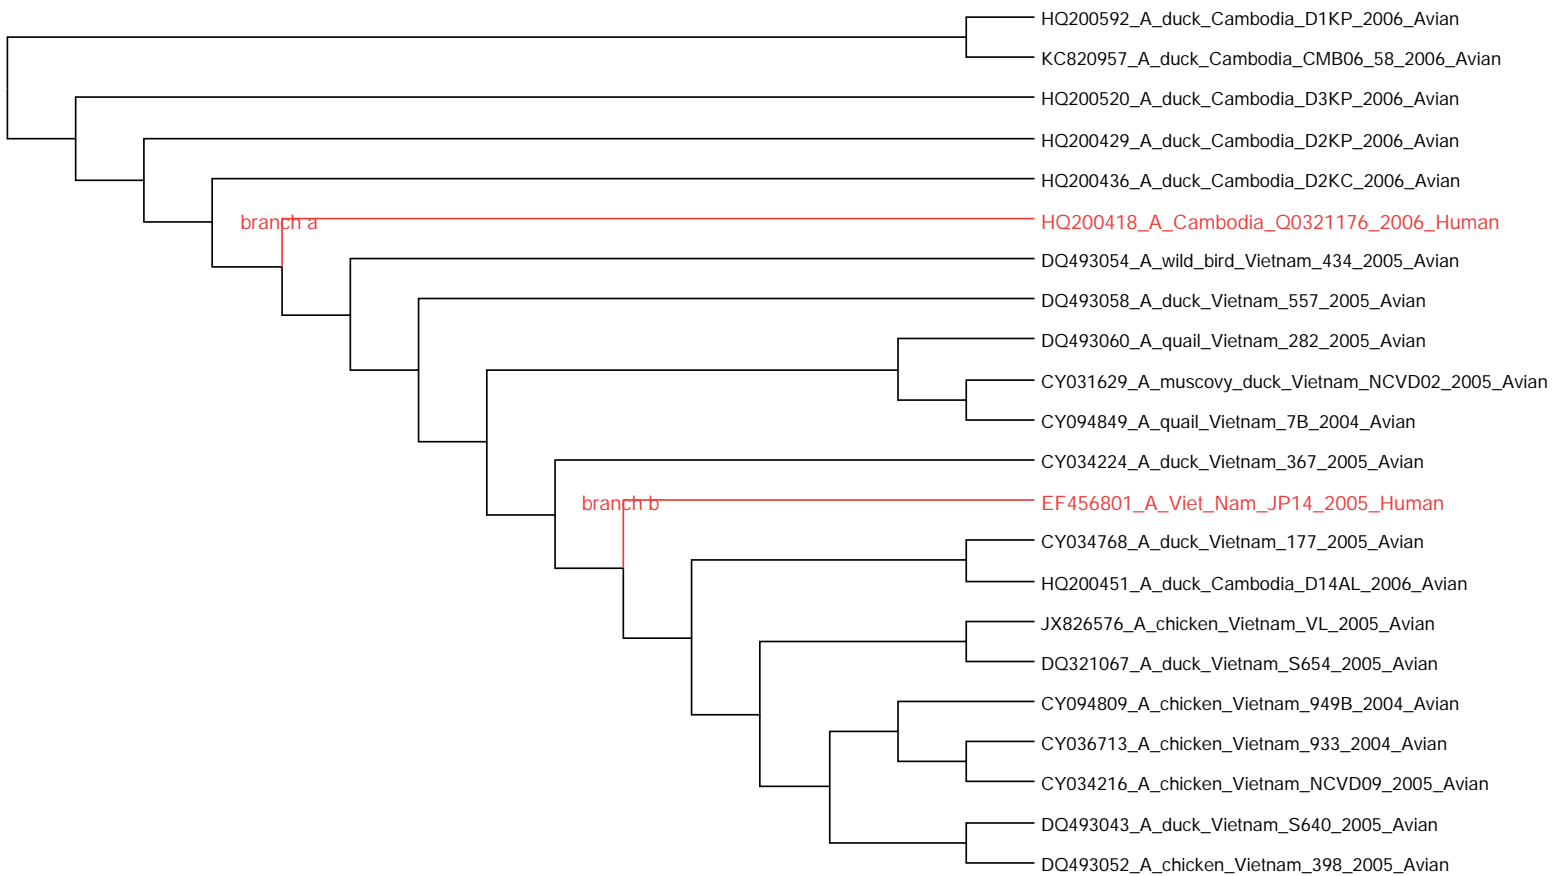



# NA1-Group97

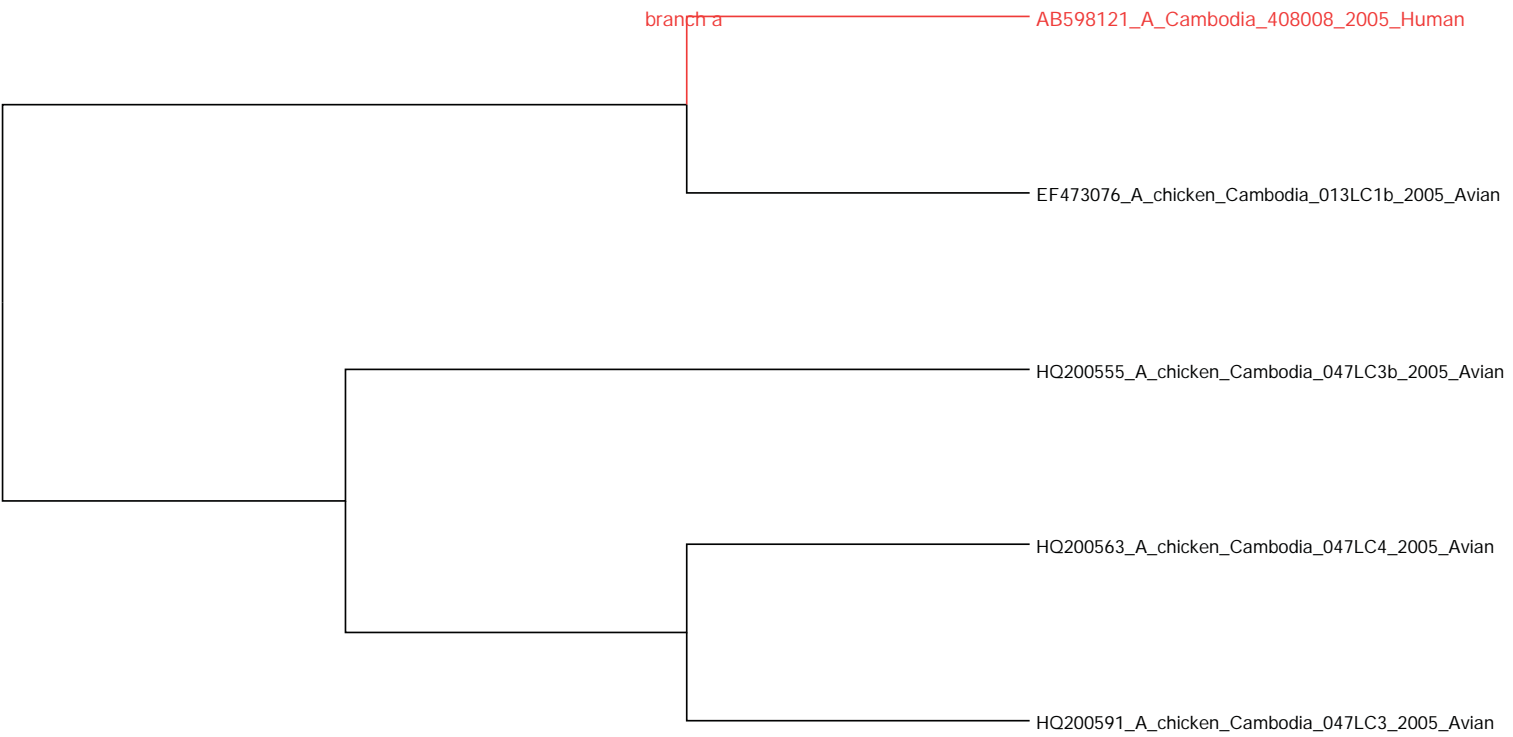

# NA1-Group98

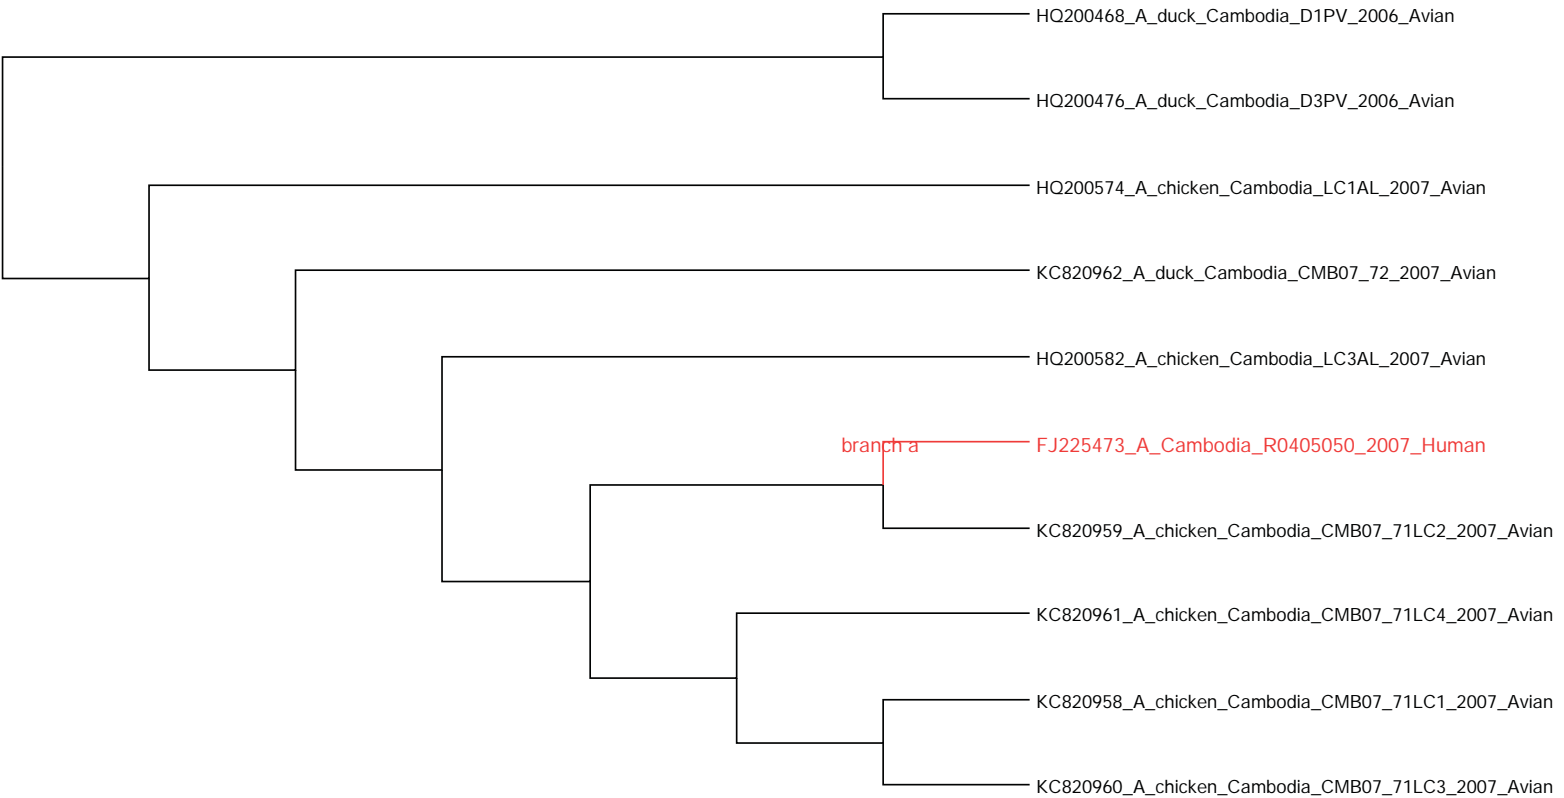

# NA1-Group99

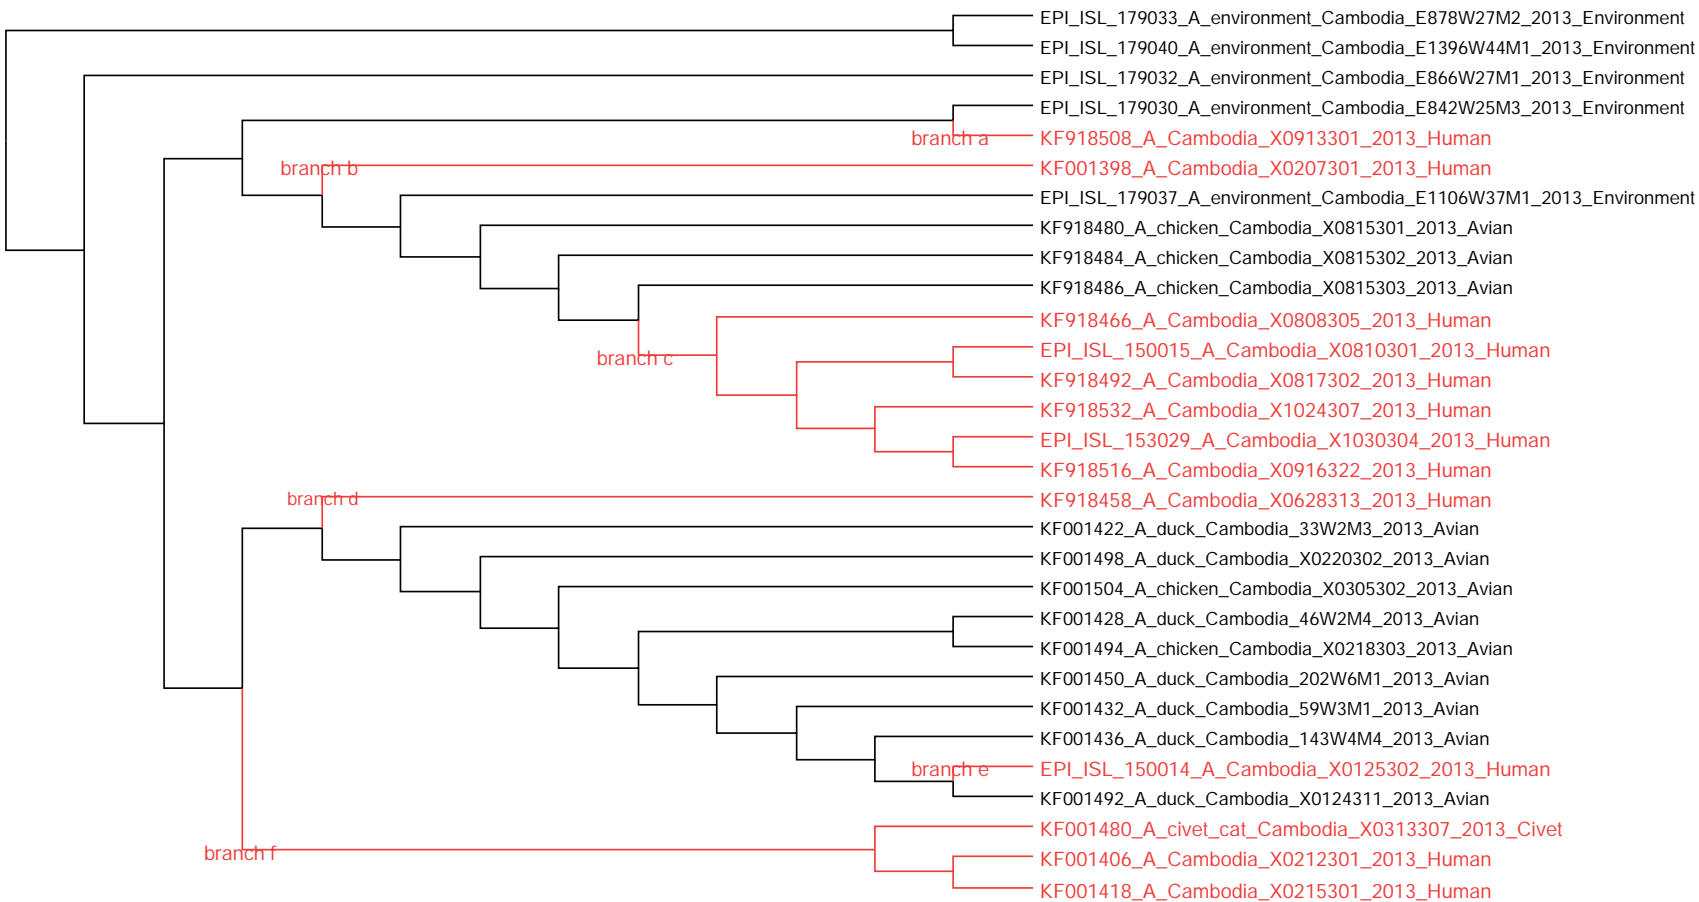

# NA1-Group100

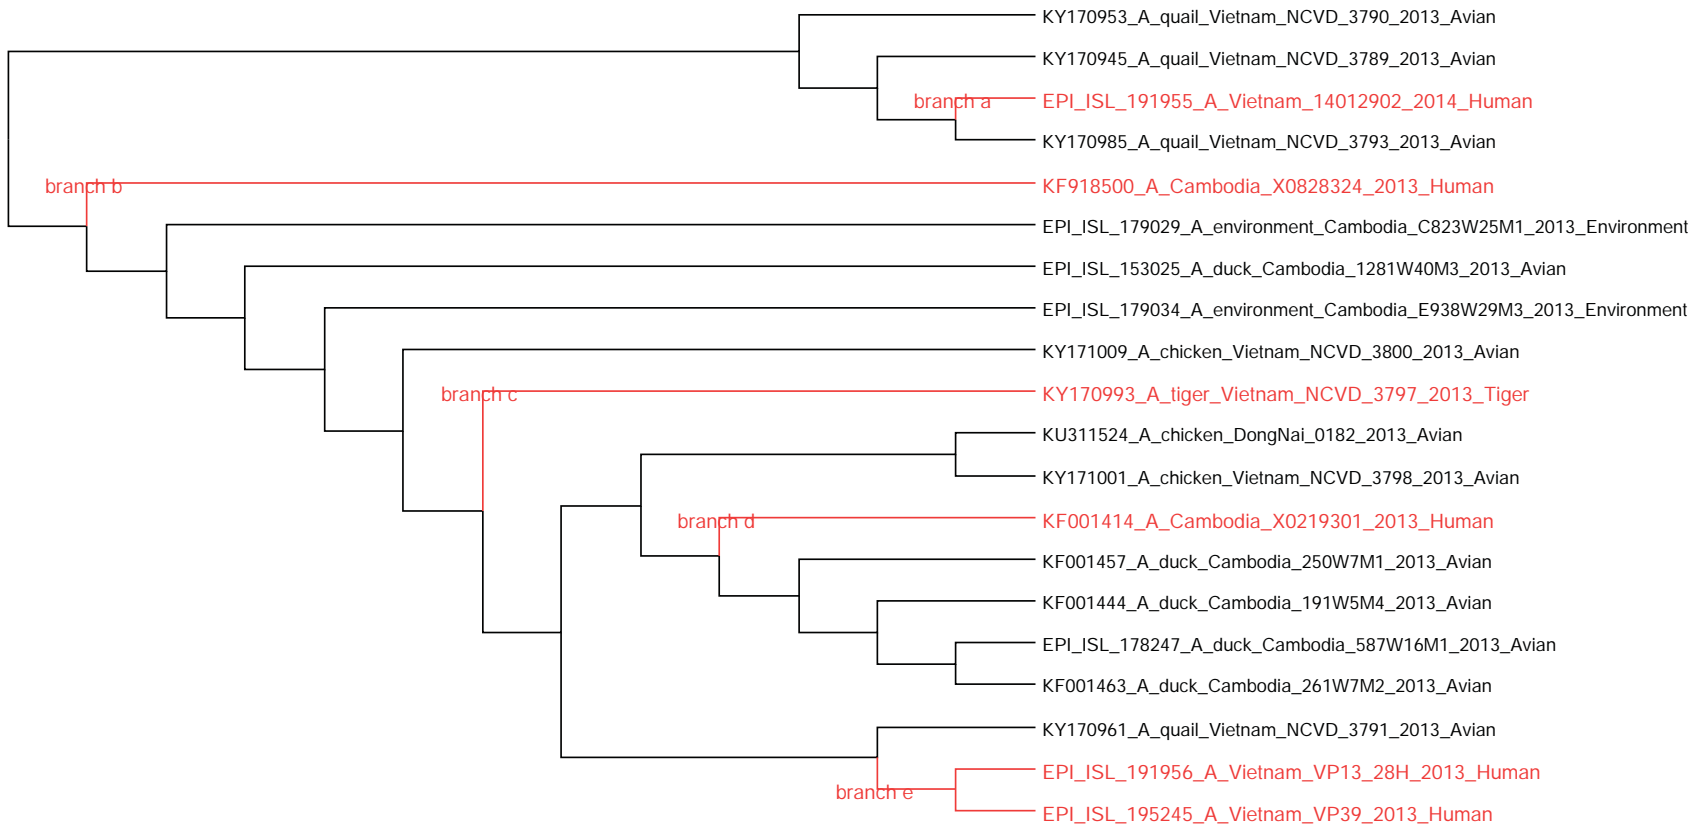

# NA1-Group101

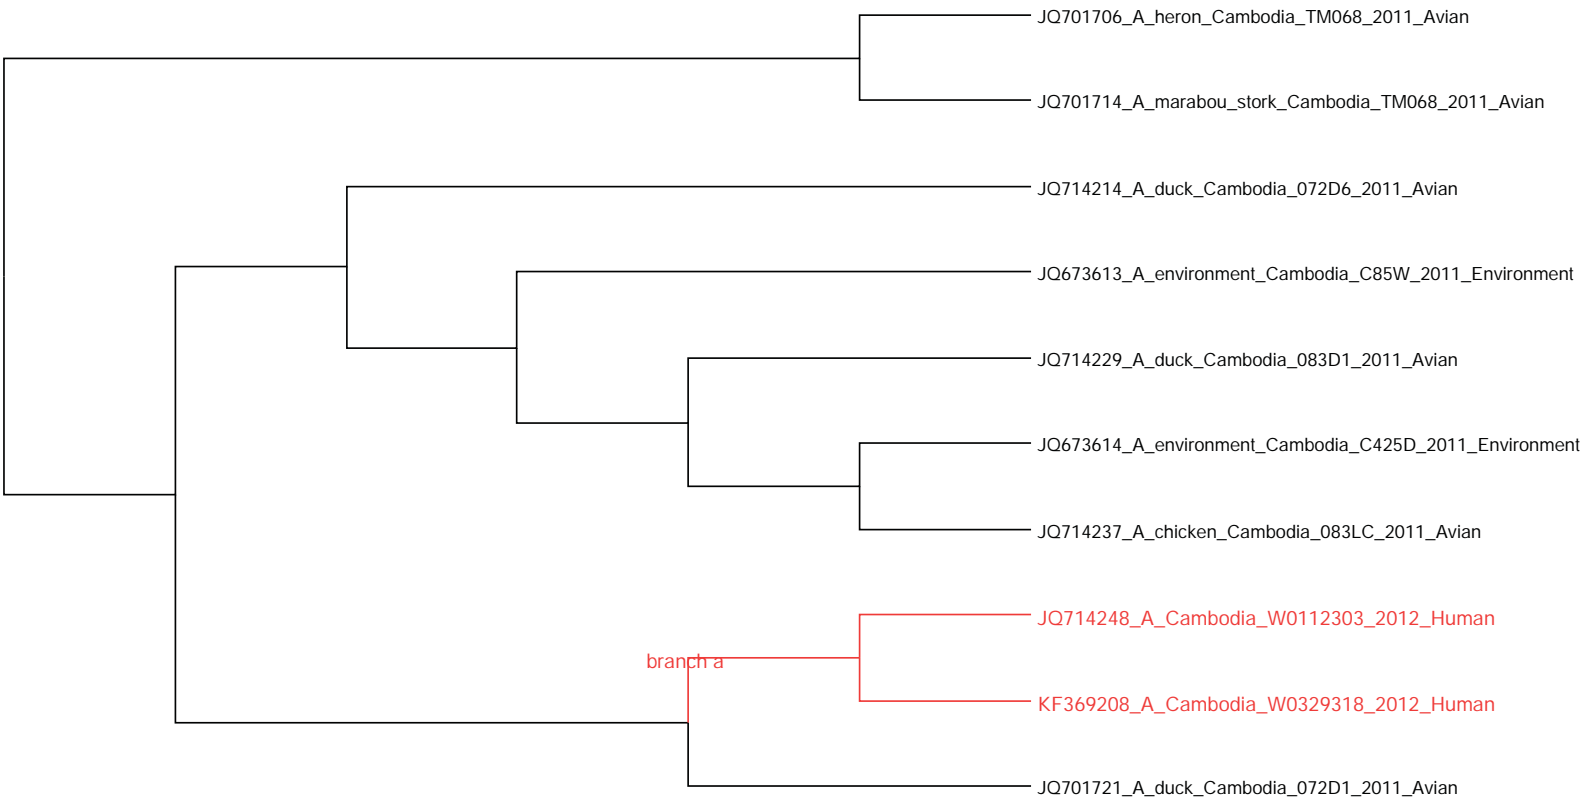

# NA1-Group102

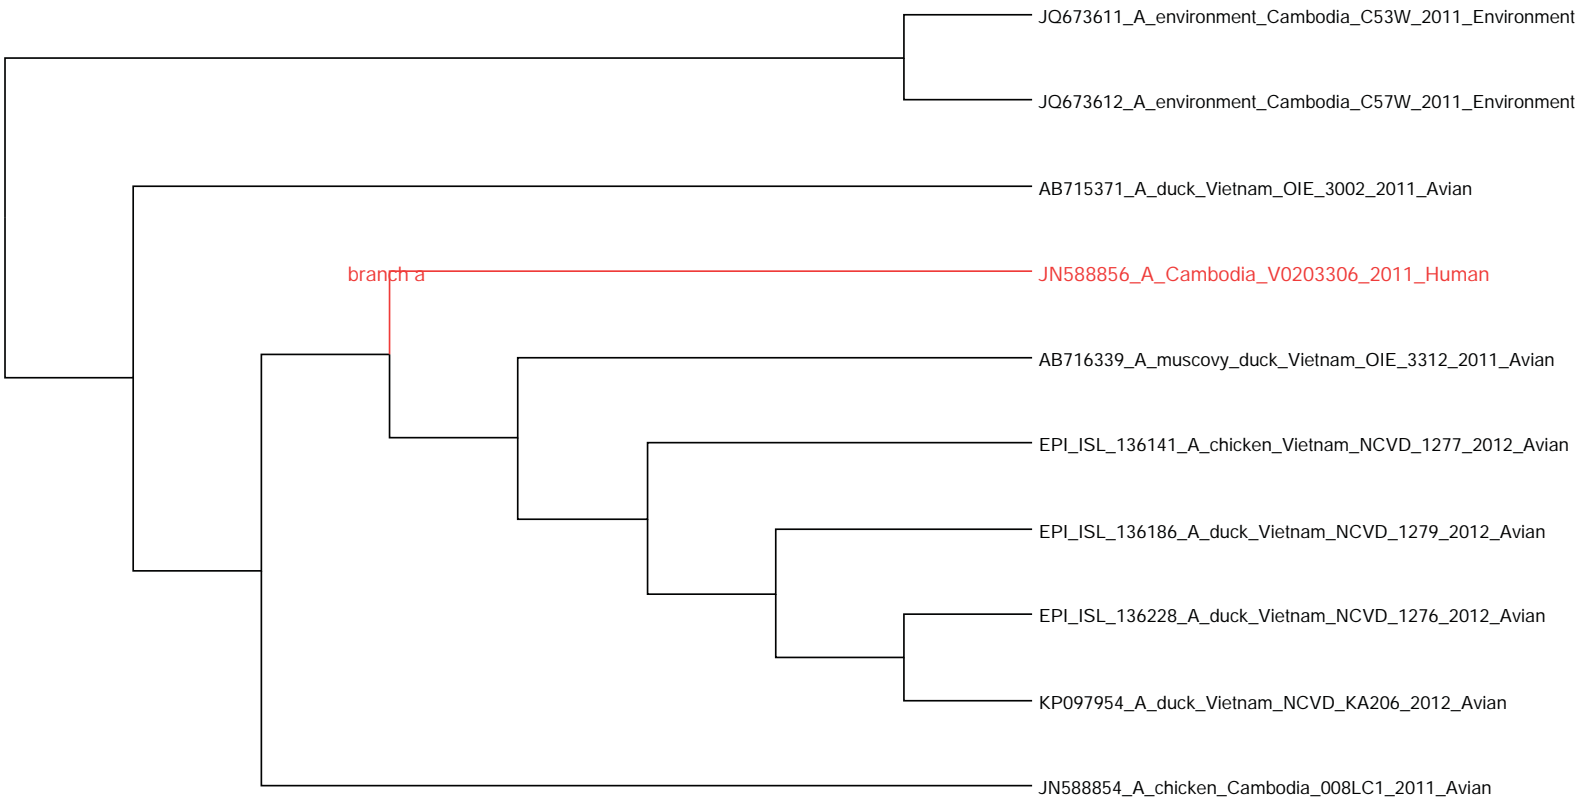

# NA1-Group103

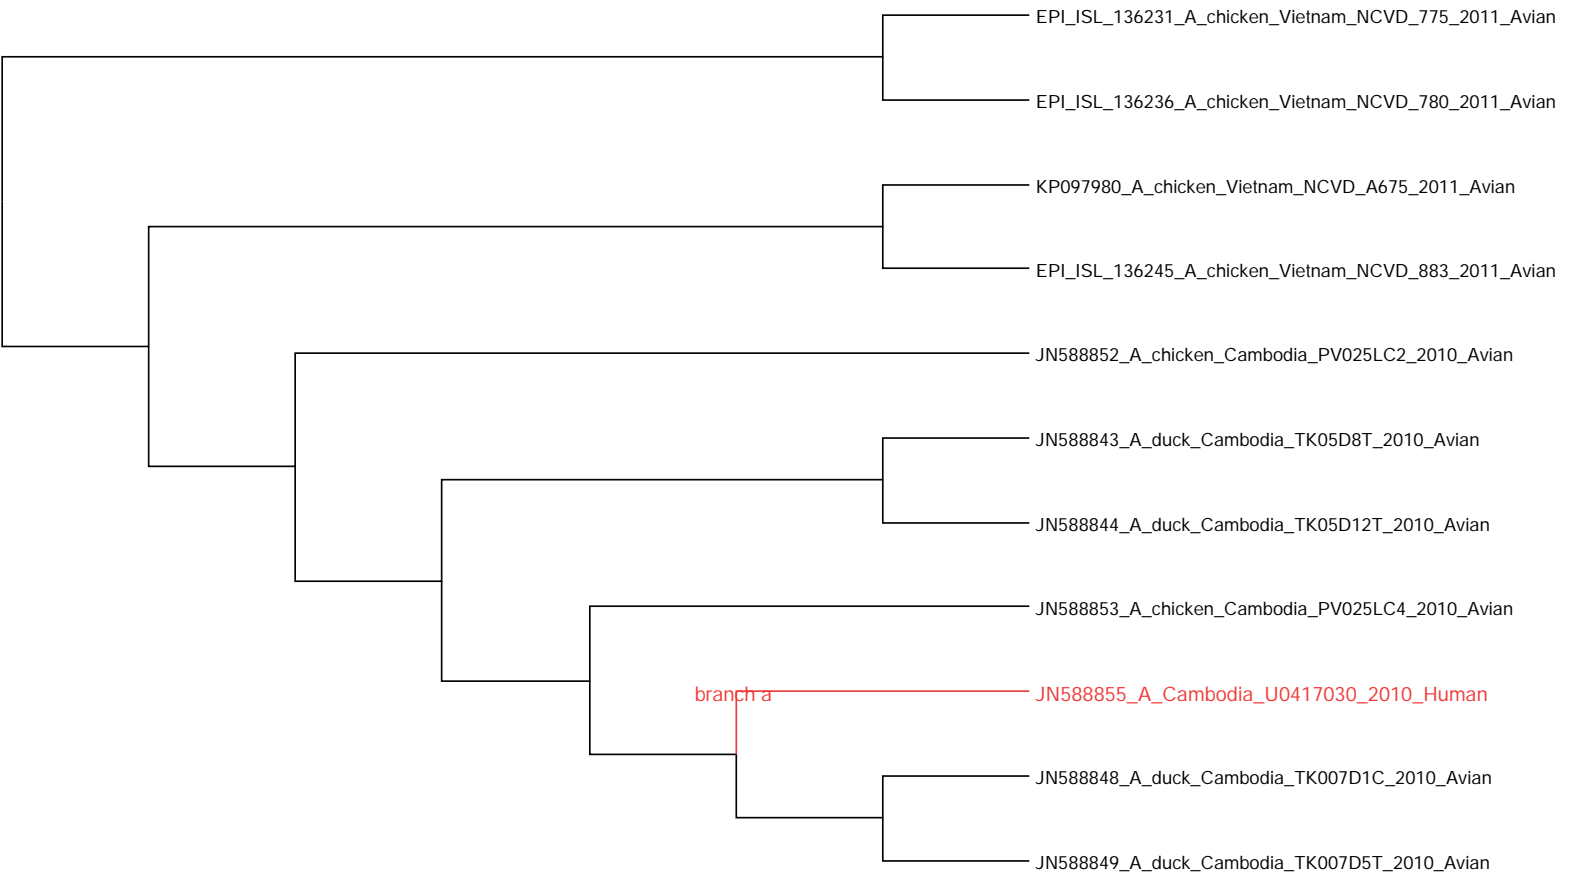

# NA1-Group104

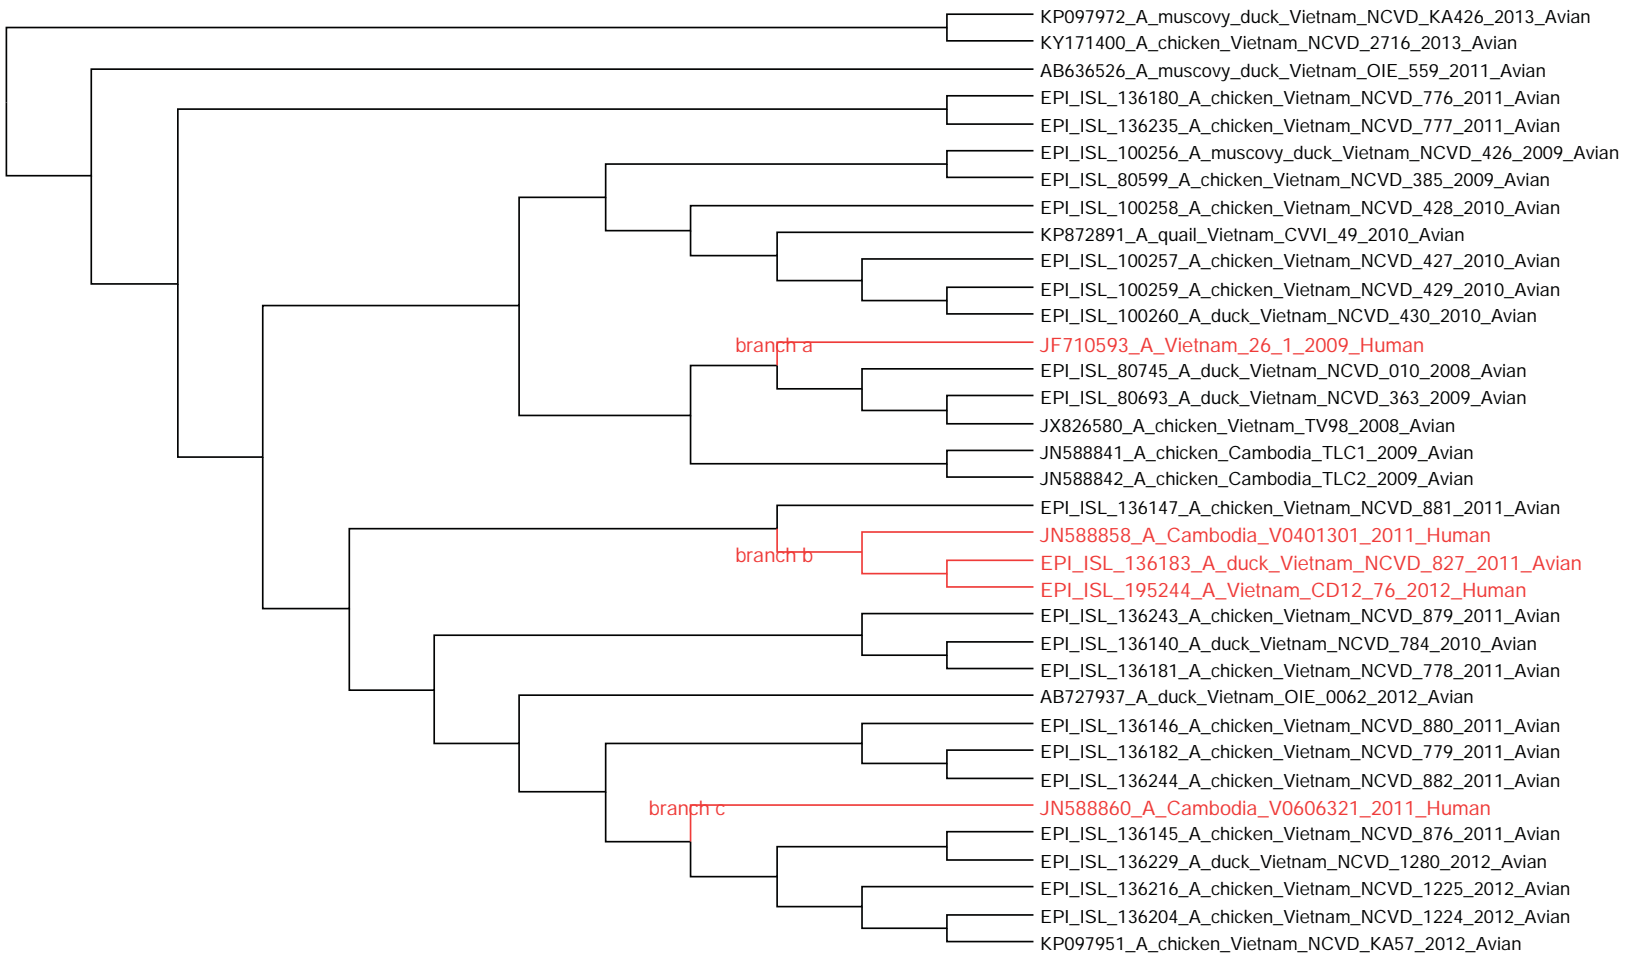



# NA6\_Group1

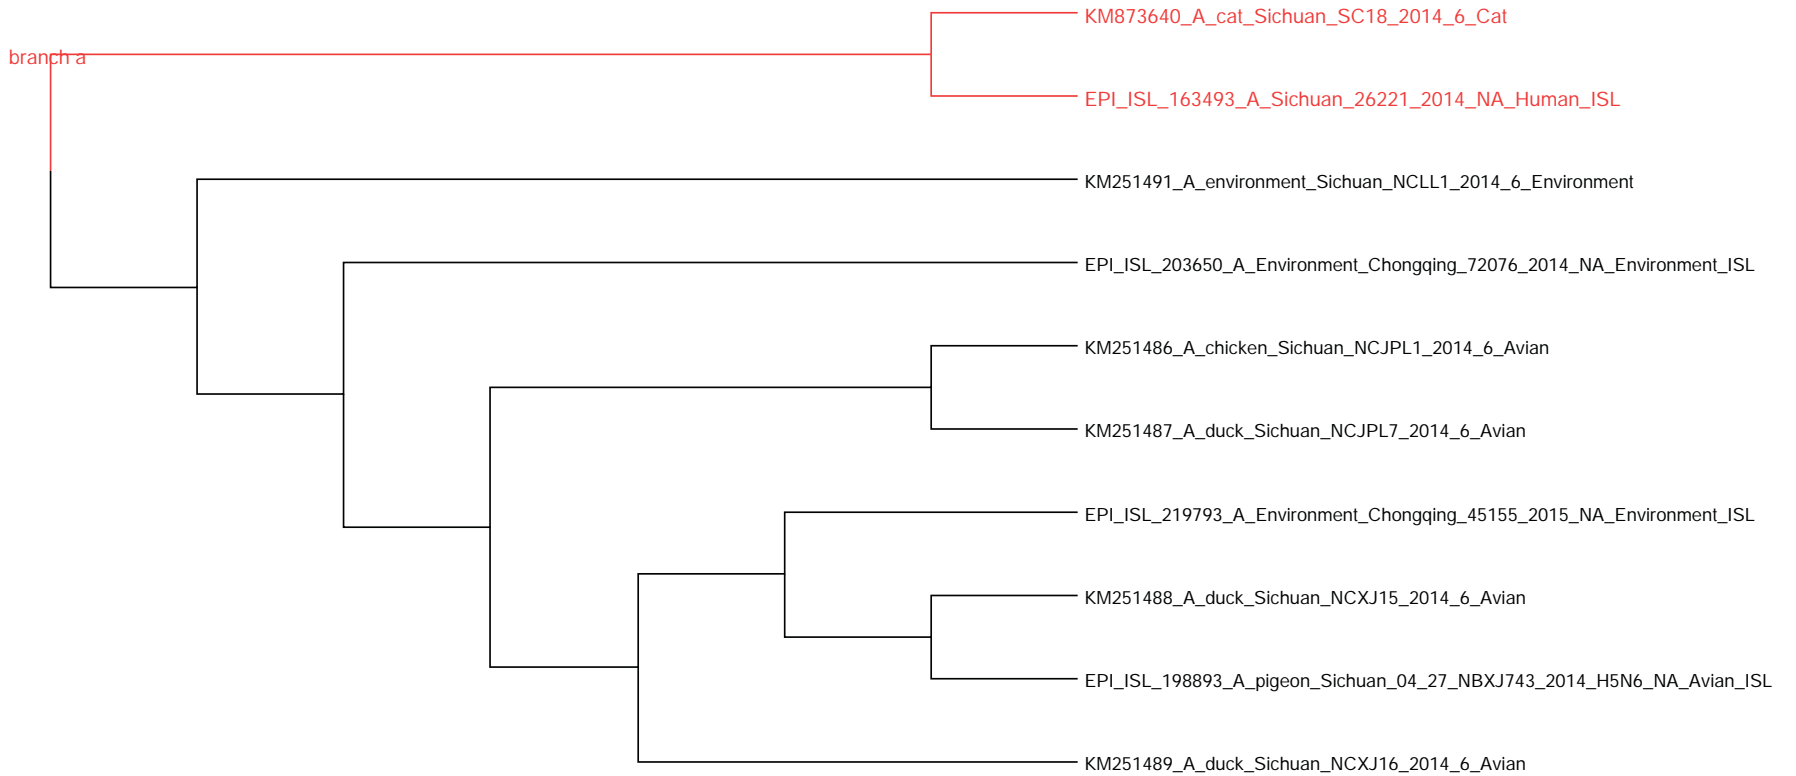

# NA6\_Group2

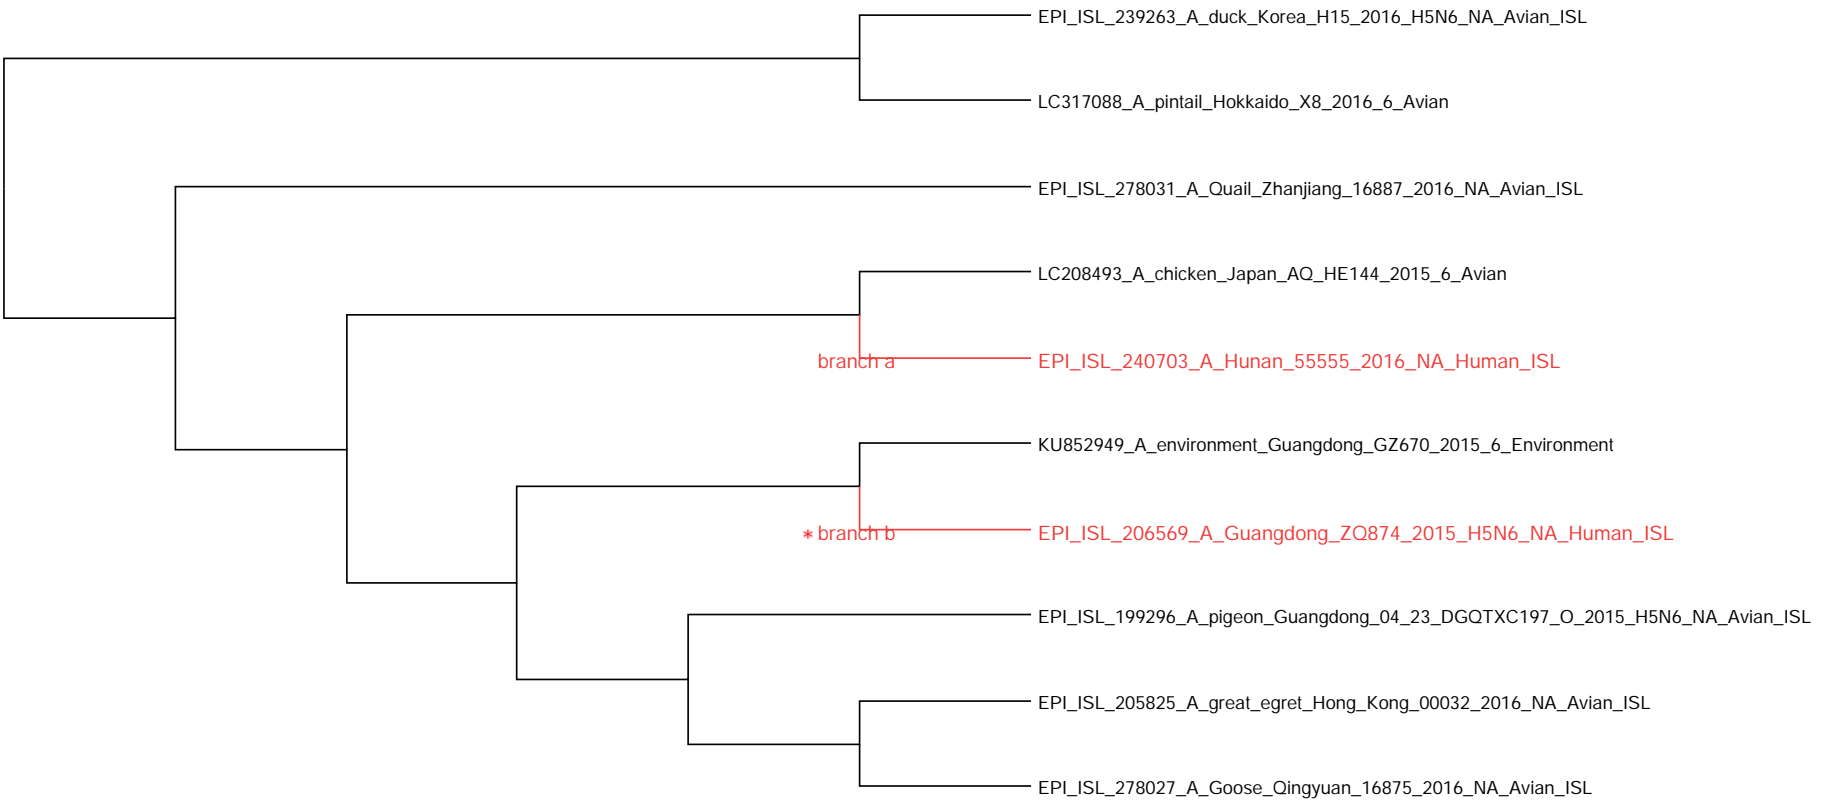

# NA6\_Group3

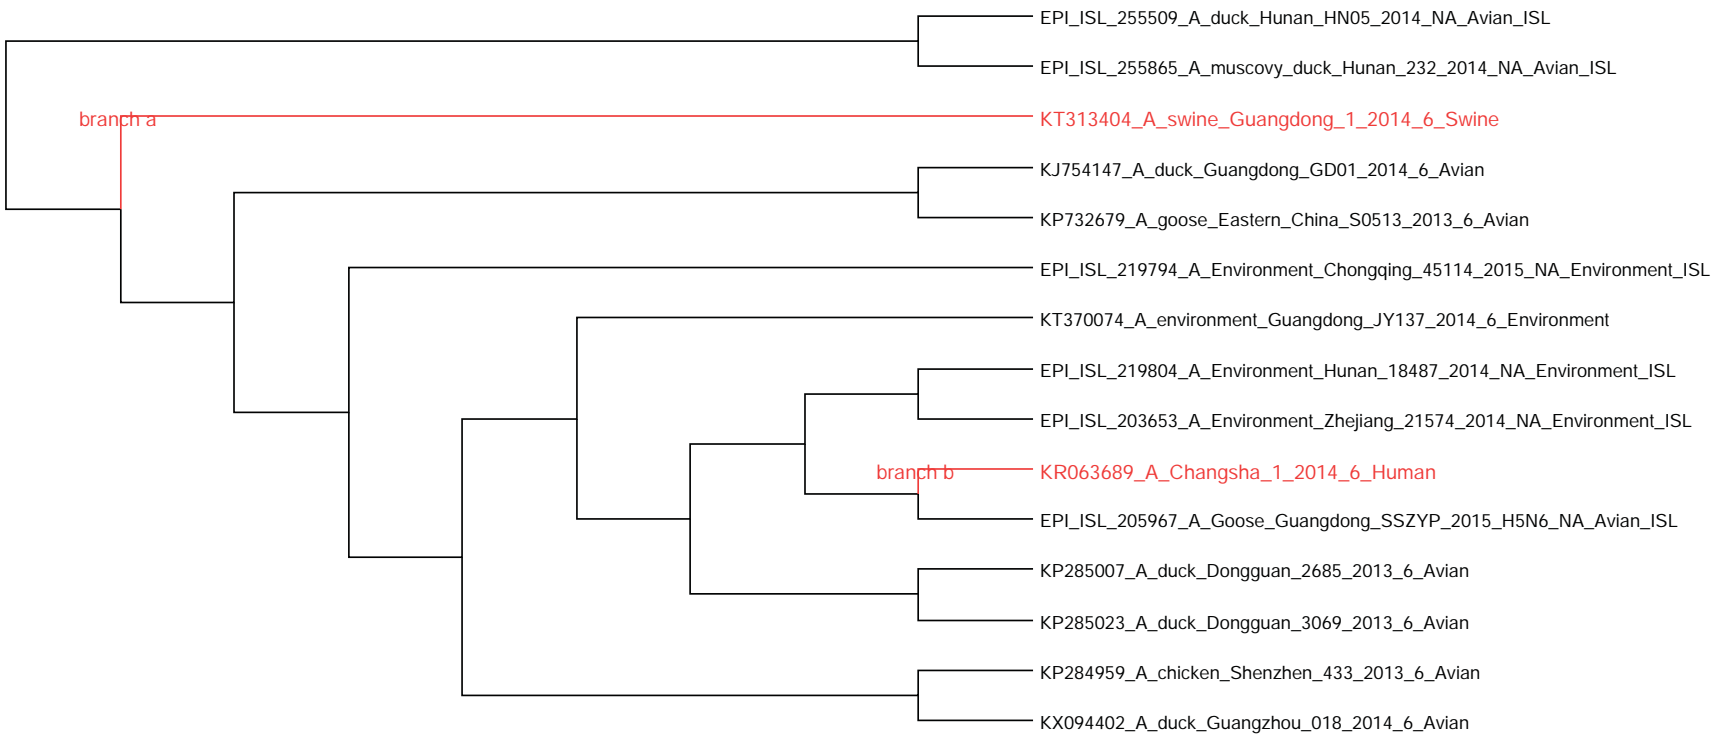

# NA6\_Group4

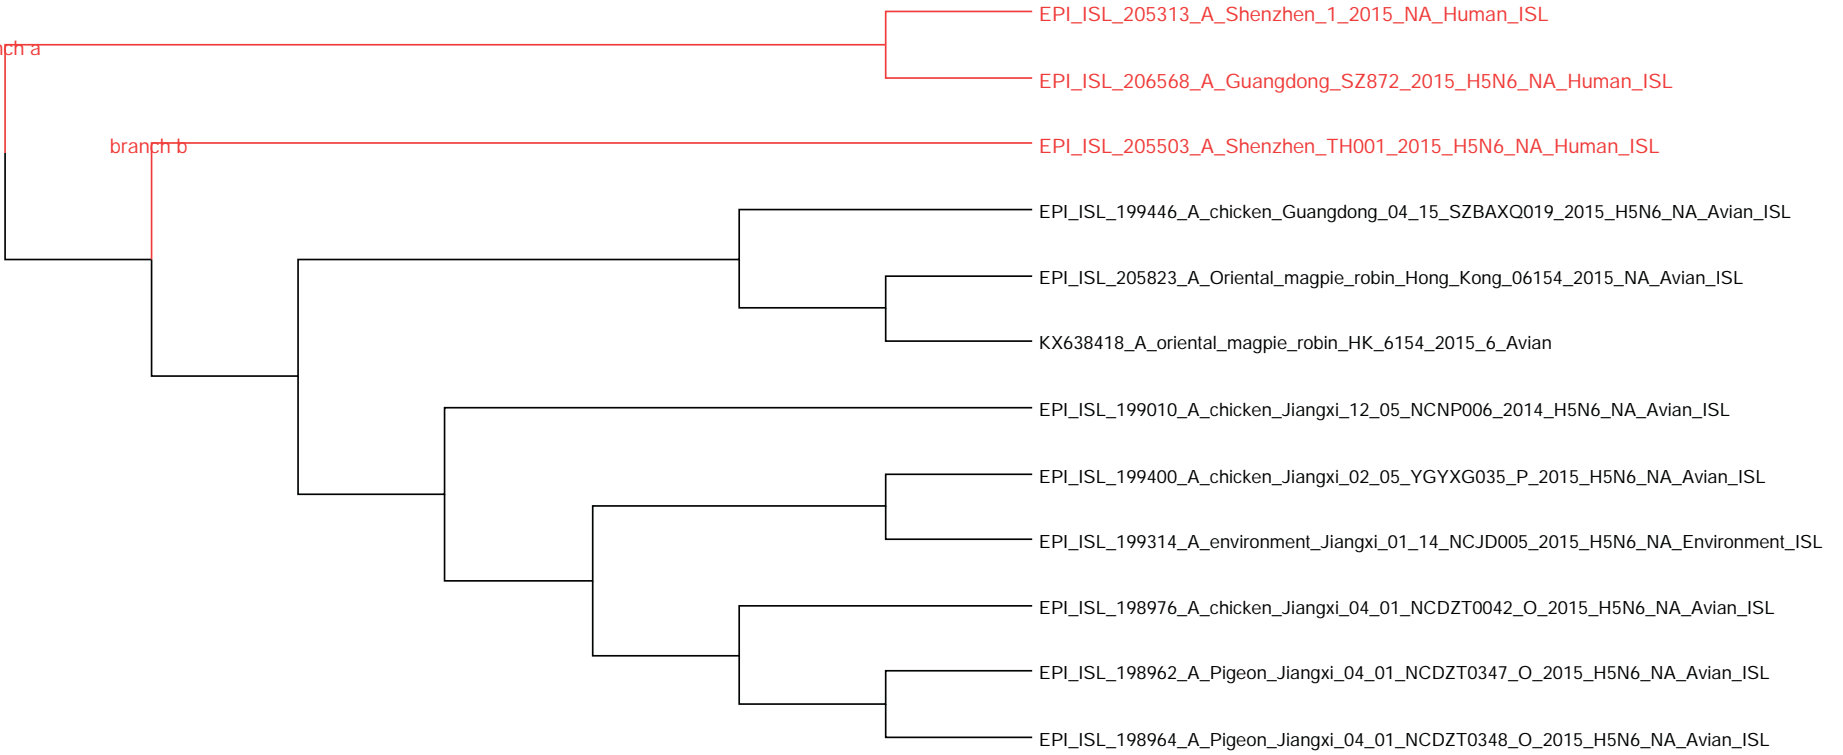

# NA6\_Group5

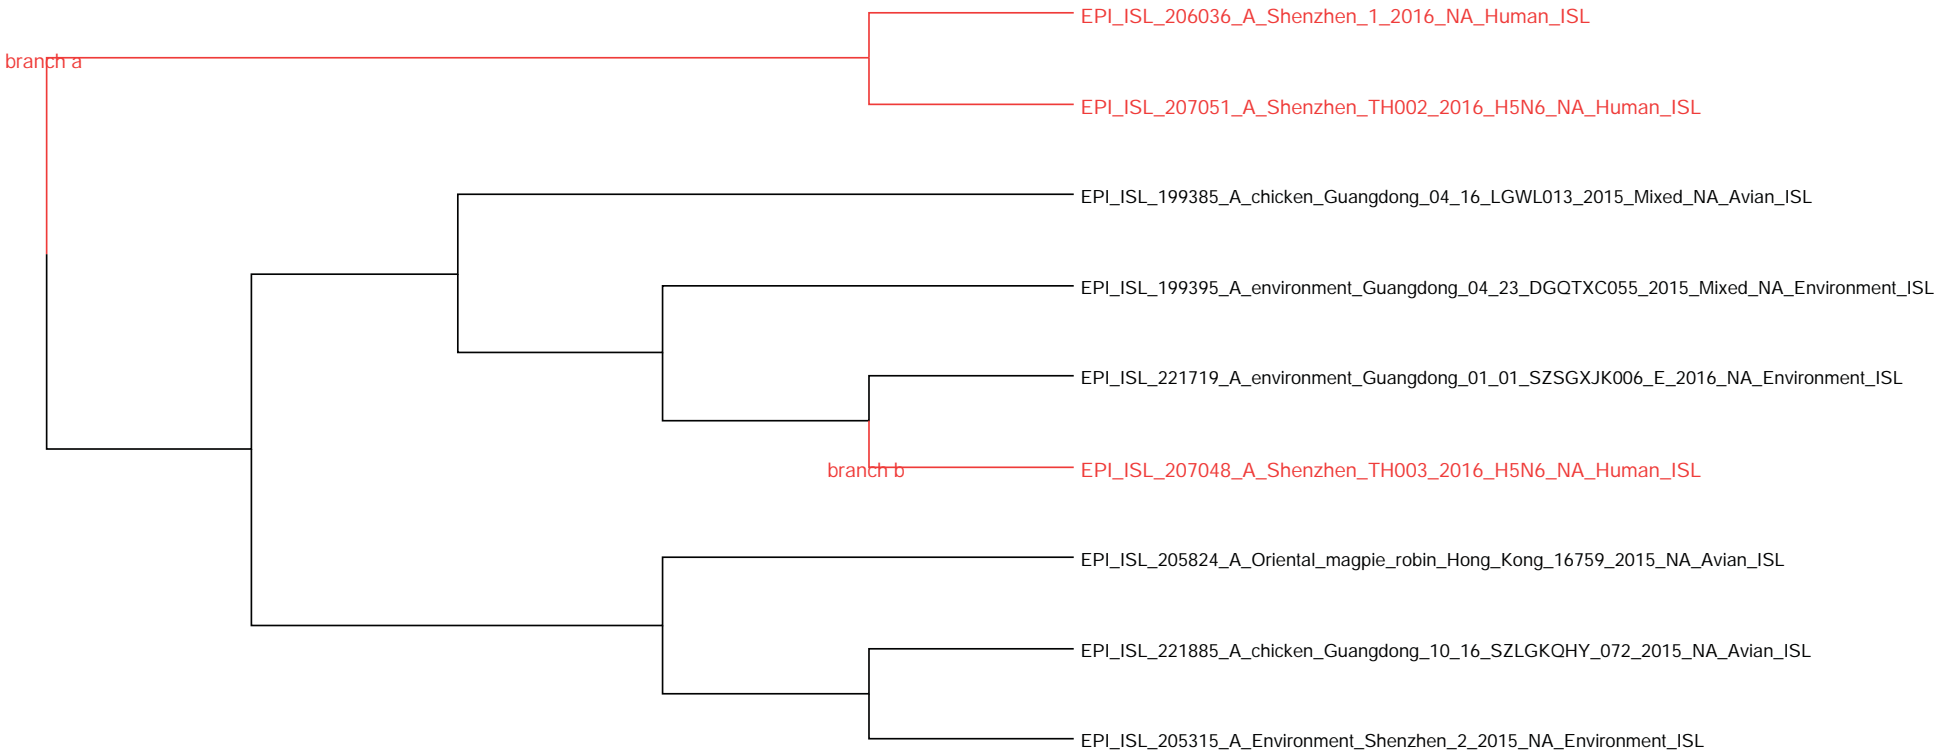

# NA6\_Group6

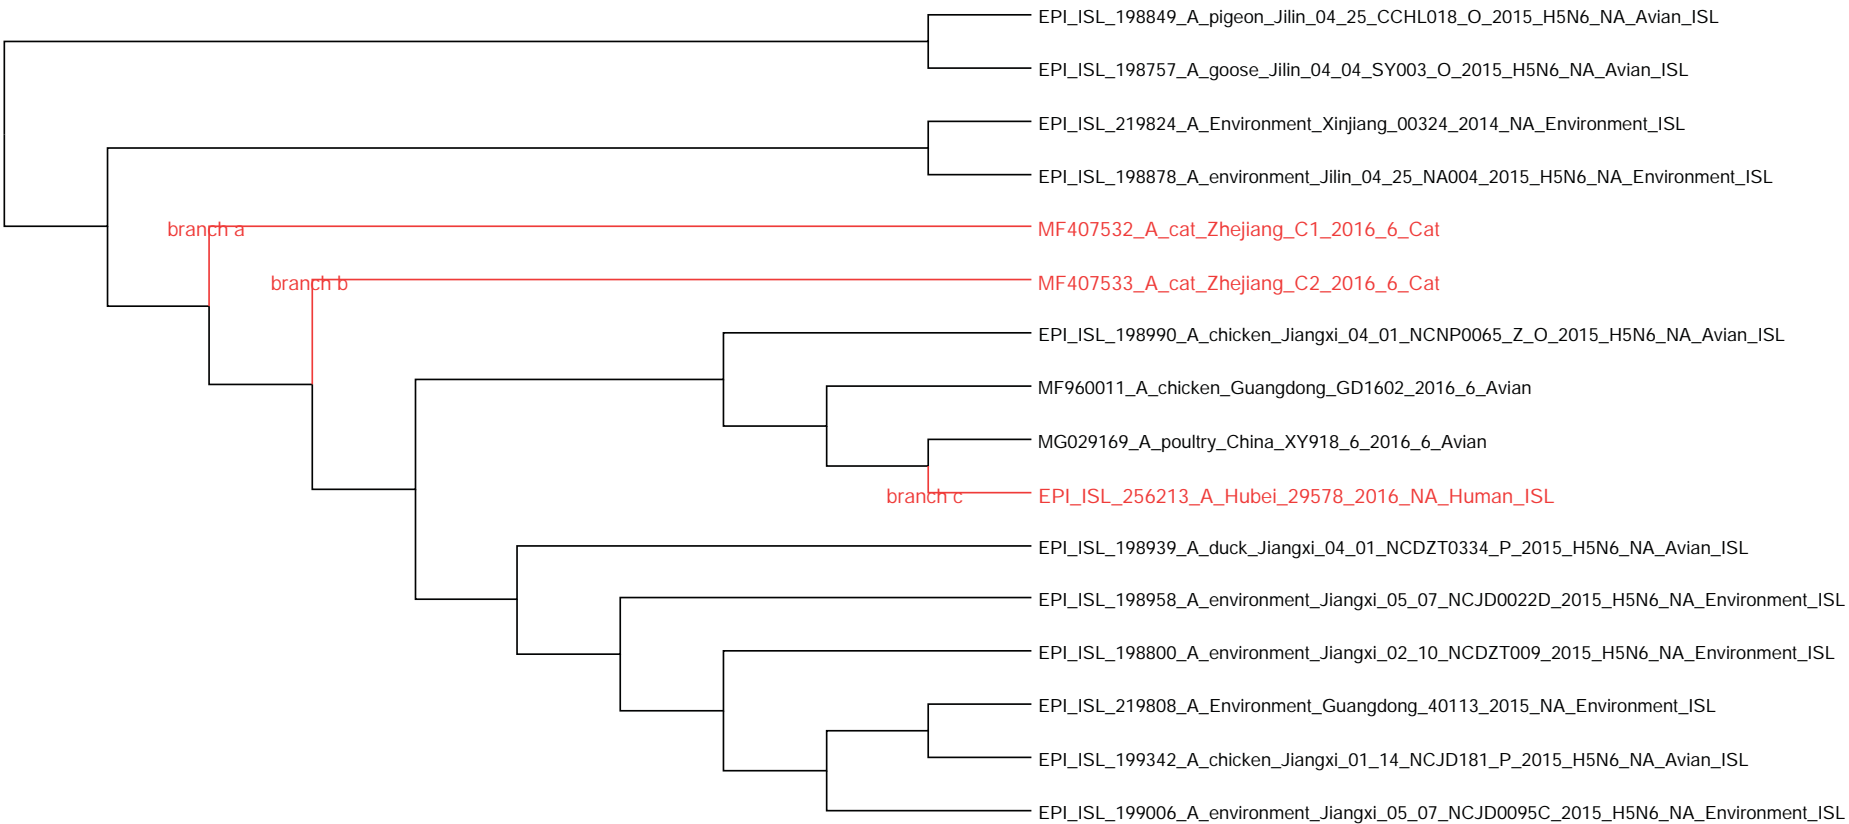

# NA6\_Group7

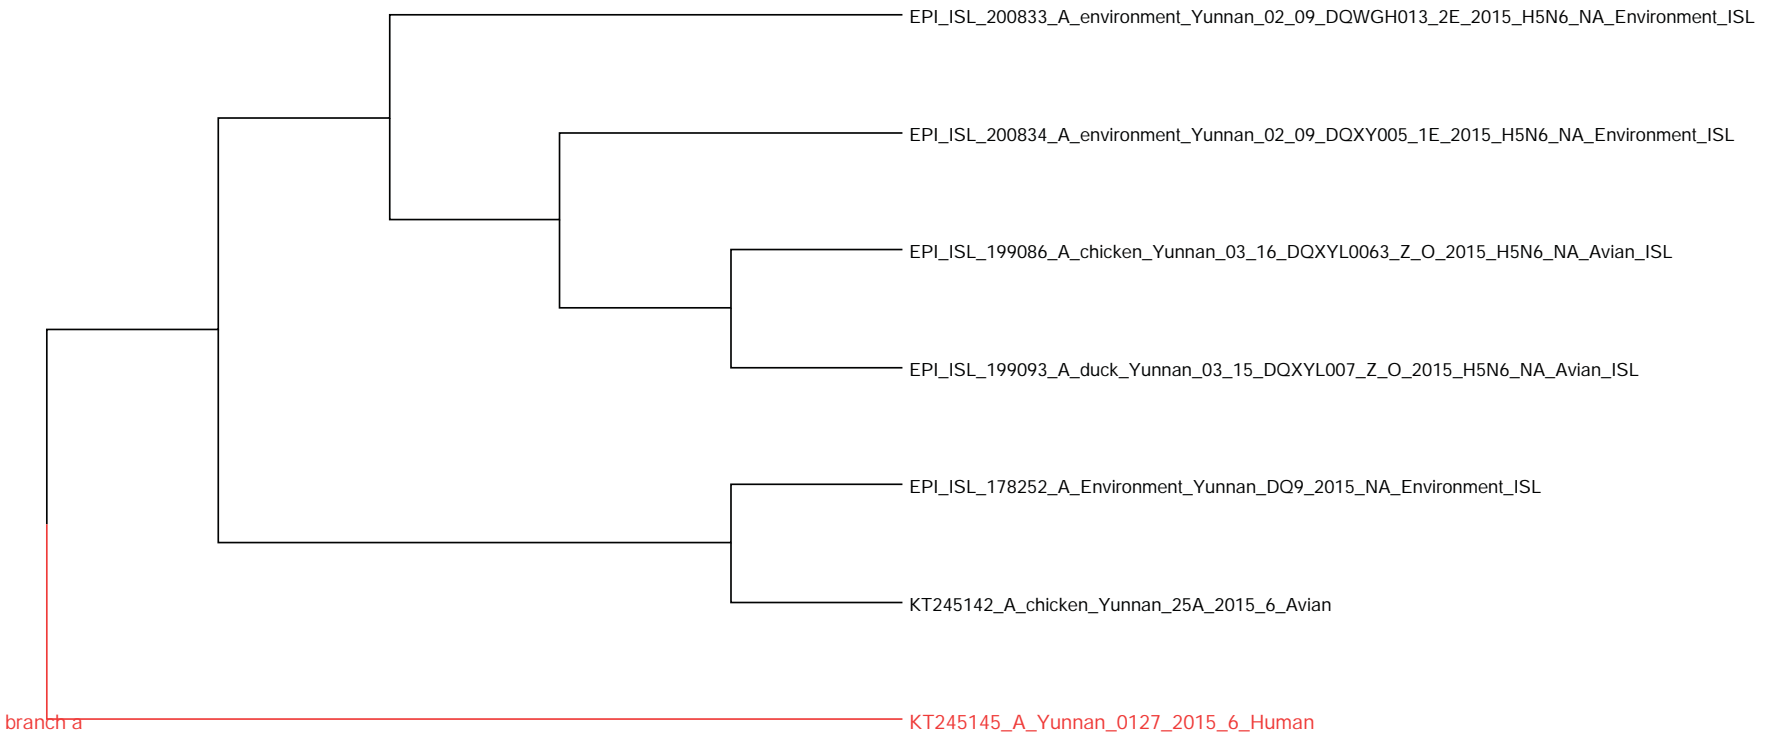

# NA6\_Group8

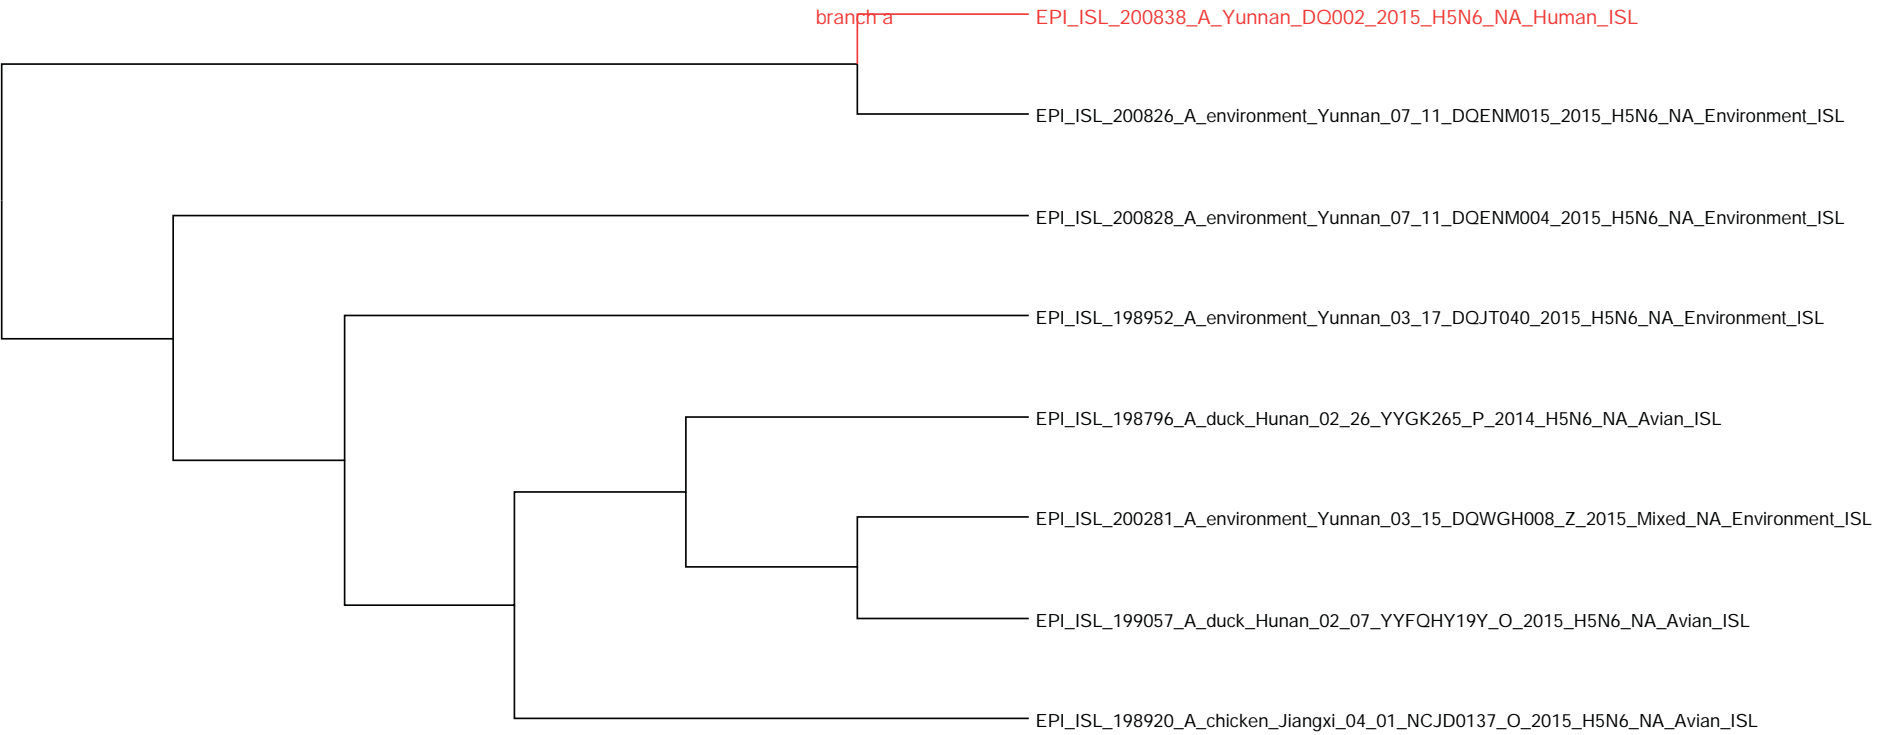



# NA6\_Group9

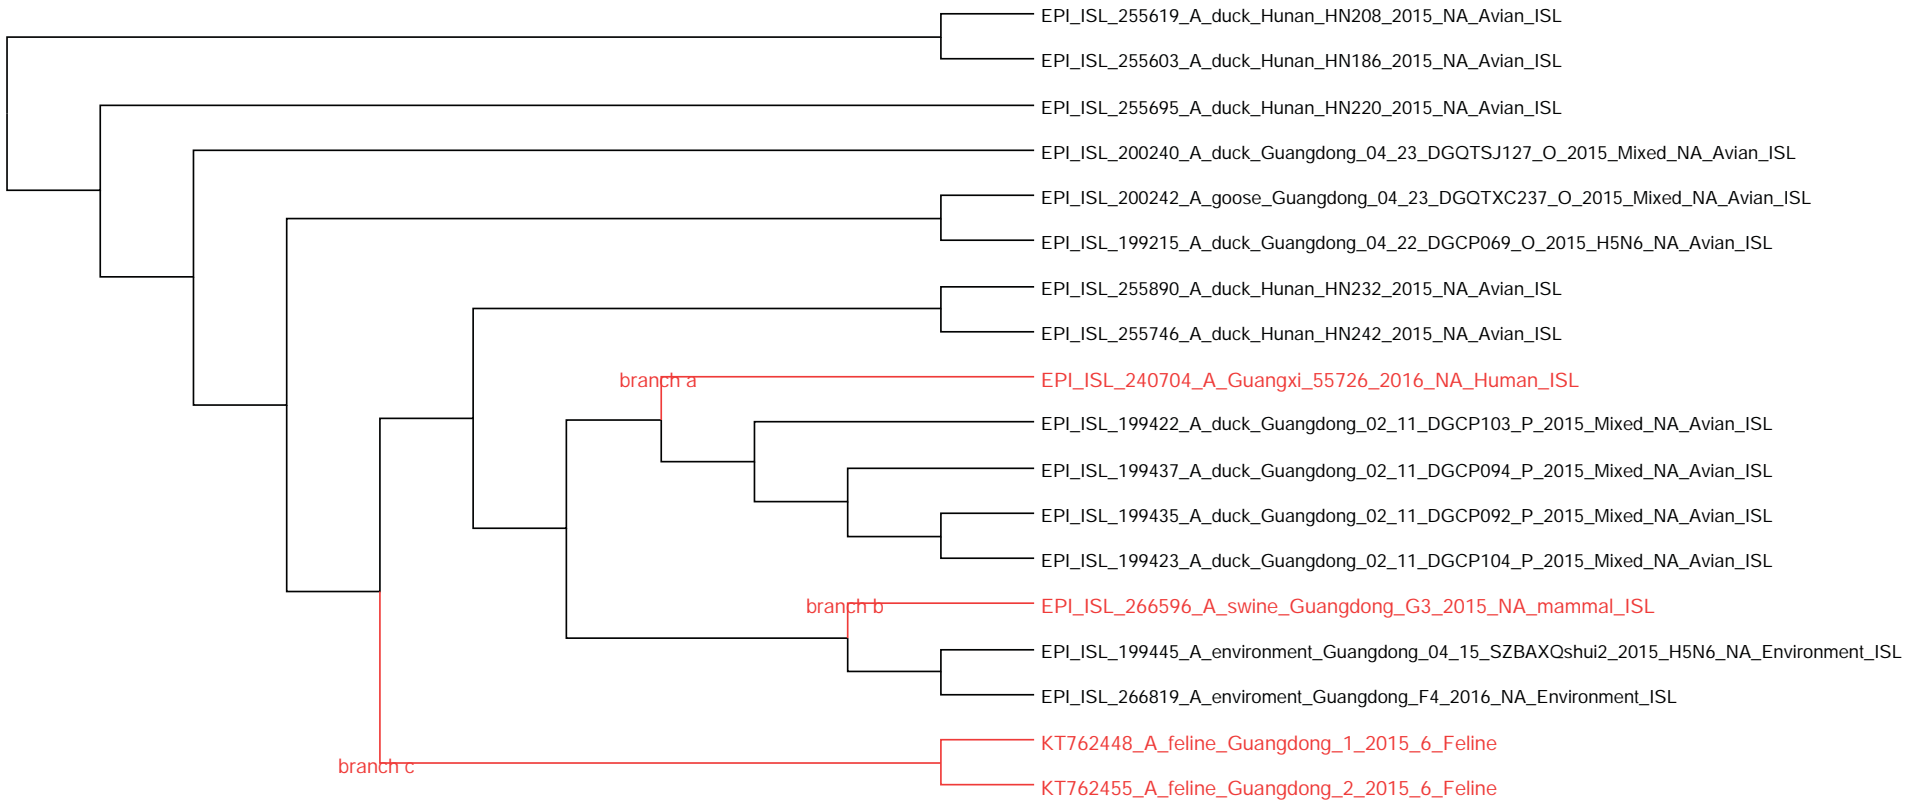

# NA6\_Group10

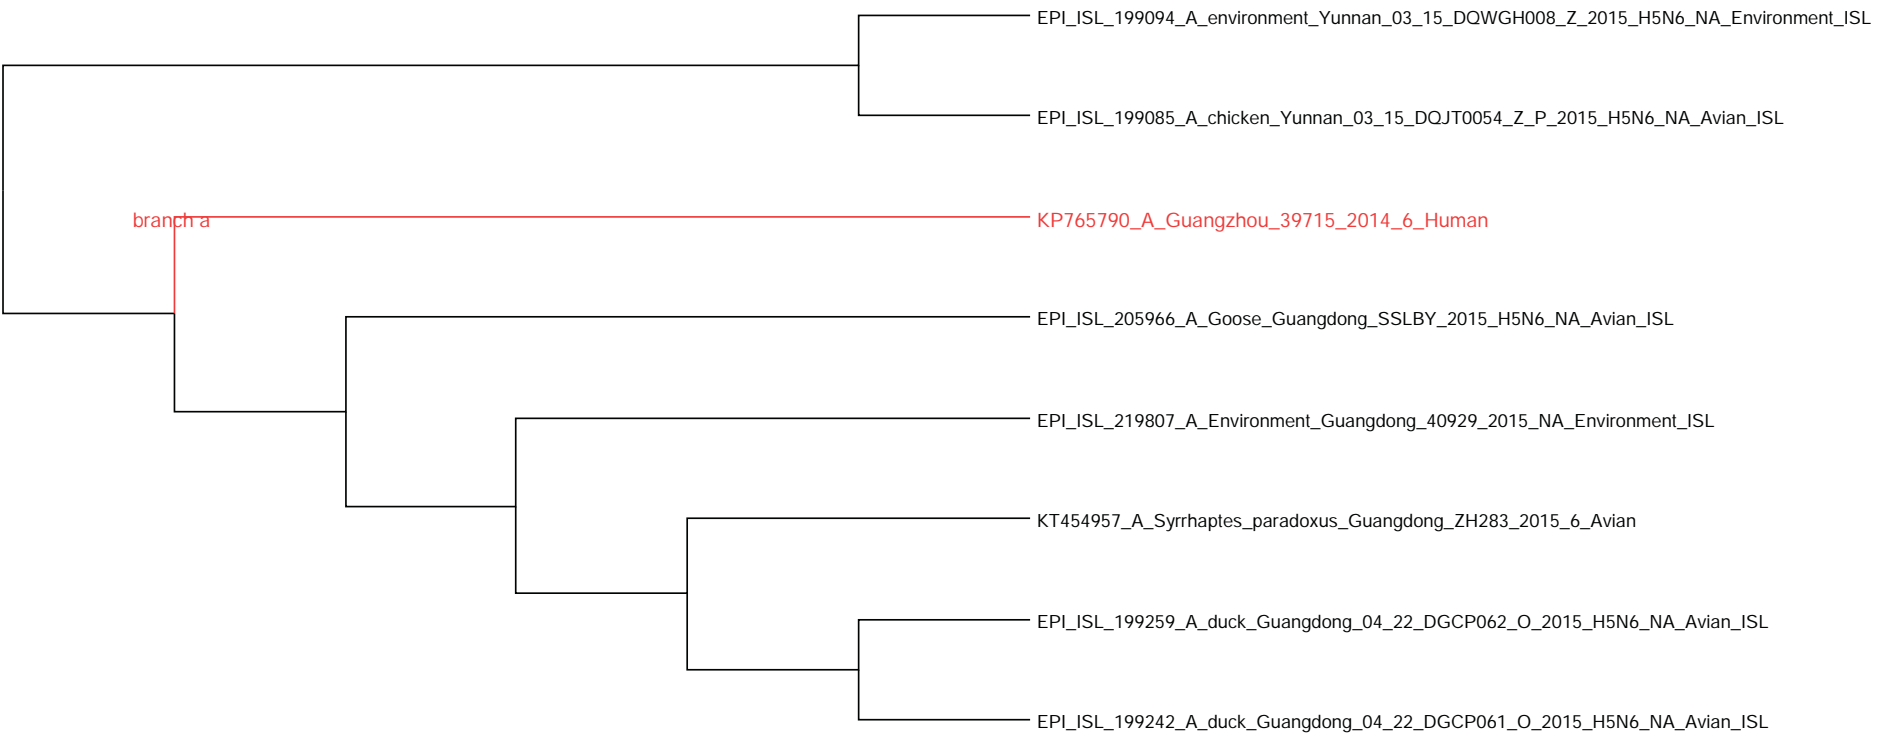

Supplement: Supplementary file [file 15450314]
